# Supplementary material for: Mitochondria-Targeted COUPY Photocages: Synthesis and Visible-Light Photoactivation in Living Cells
Source: PubMed Central journal article supplement (PMC10242765; doi:10.1021/acs.joc.3c00387), 2023-05-20
Supplement: jo3c00387_si_001.pdf [file jo3c00387_si_001.pdf]

## SUPPORTING INFORMATION

### **Mitochondria-targeted COUPY photocages: synthesis and visible-light photoactivation in living cells.**

Marta López-Corrales,<sup>1</sup> Anna Rovira,<sup>1</sup> Albert Gandioso,<sup>1</sup> Santi Nonell,<sup>2</sup> Manel Bosch,<sup>3</sup>  
Vicente Marchán\*.<sup>1</sup>

<sup>1</sup> Departament de Química Inorgànica i Orgànica, Secció de Química Orgànica, Institut de Biomedicina de la Universitat de Barcelona (IBUB), Universitat de Barcelona (UB), Martí i Franqués 1–11, E-08028 Barcelona (Spain).

<sup>2</sup> Institut Químic de Sarrià, Universitat Ramon Llull, Vía Augusta 390, E-08017 Barcelona (Spain)

<sup>3</sup> Unitat de Microscòpia Òptica Avançada, Centres Científics i Tecnològics (CCiTUB), Universitat de Barcelona (UB), Av. Diagonal 643, E- 08028 Barcelona (Spain)

E-mail: [vmarchan@ub.edu](mailto:vmarchan@ub.edu)

## Table of contents

|                                                                                                   |     |
|---------------------------------------------------------------------------------------------------|-----|
| 1.- Reversed-phase HPLC analysis of COUPY-caged compounds ( <b>3-8</b> )                          | S3  |
| 2.- 2D NMR characterization of coumarin scaffolds ( <b>12-14, 17 and 18</b> )                     | S4  |
| 3.- 2D NMR characterization of COUPY-caged compounds ( <b>4-8</b> )                               | S9  |
| 4.- Irradiation experiments                                                                       | S14 |
| 5.- Confocal microscopy studies                                                                   | S26 |
| 6.- $^1\text{H}$ , $^{13}\text{C}$ and $^{19}\text{F}$ NMR spectra and HR ESI-MS of the compounds | S32 |

## 1.- Reversed-phase HPLC analysis of COUPY-caged compounds (3-8).

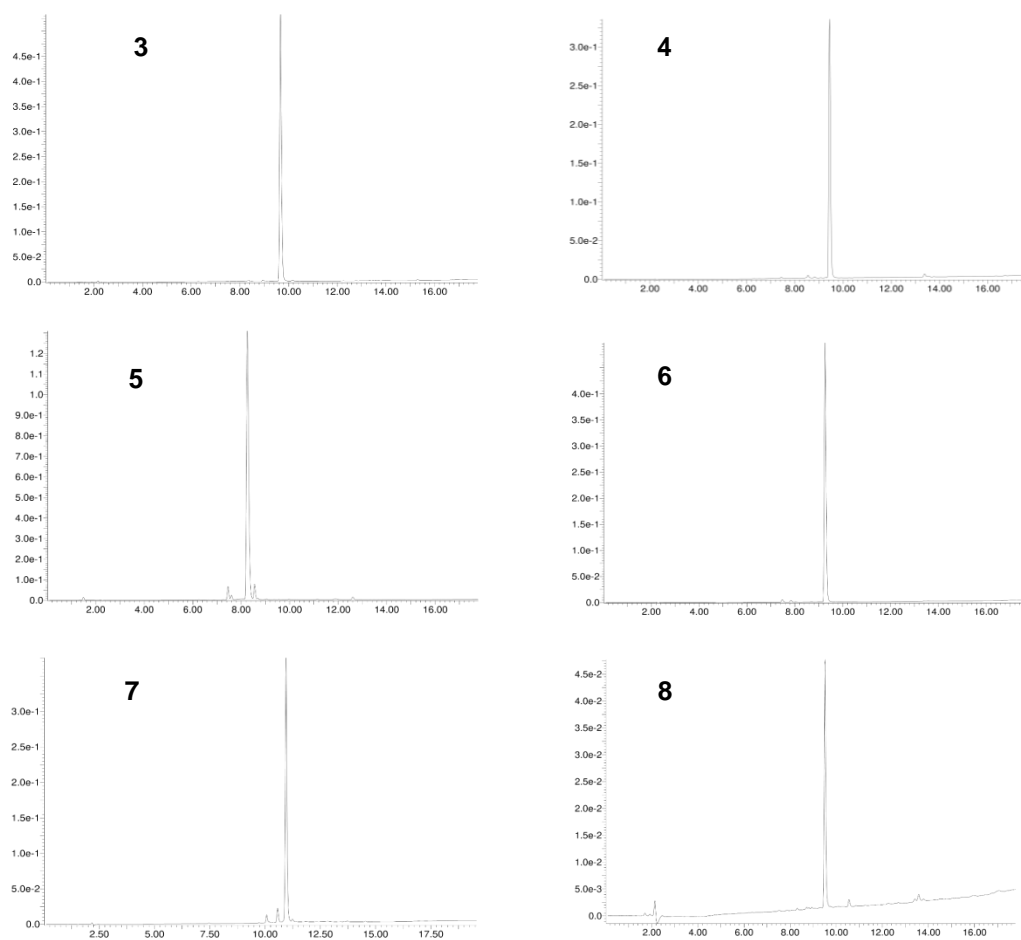

**Figure S1.** Reversed-phase HPLC traces of COUPY-caged compounds (3-8).

## 2.- 2D NMR characterization of coumarin scaffolds (12-14, 17 and 18).

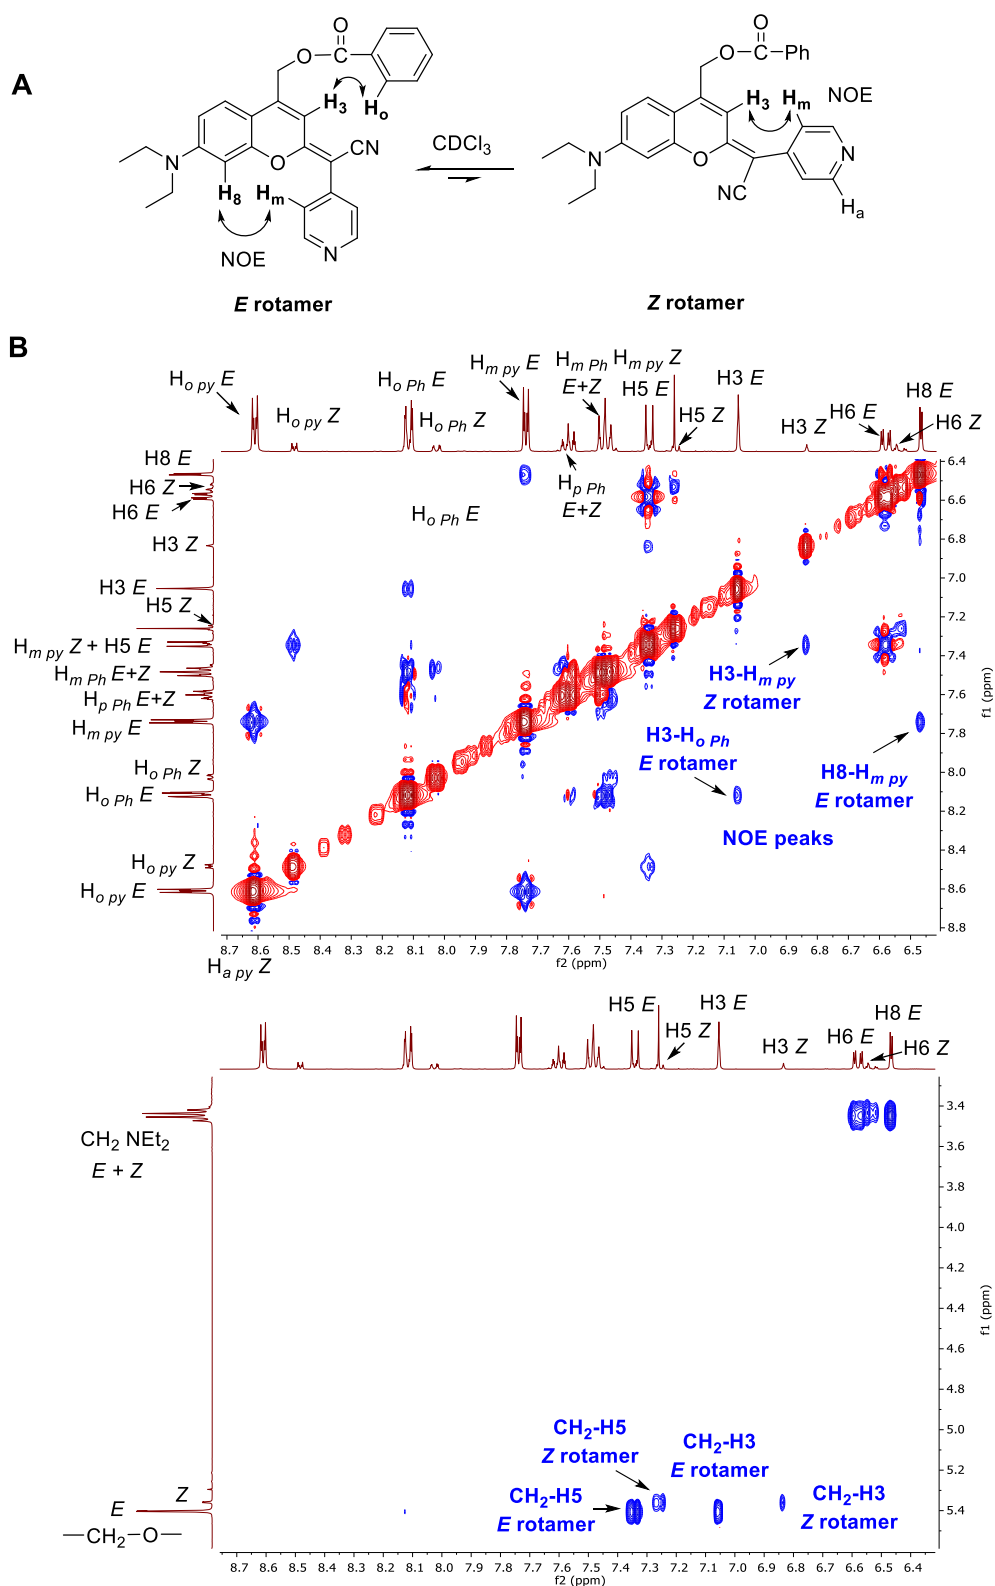

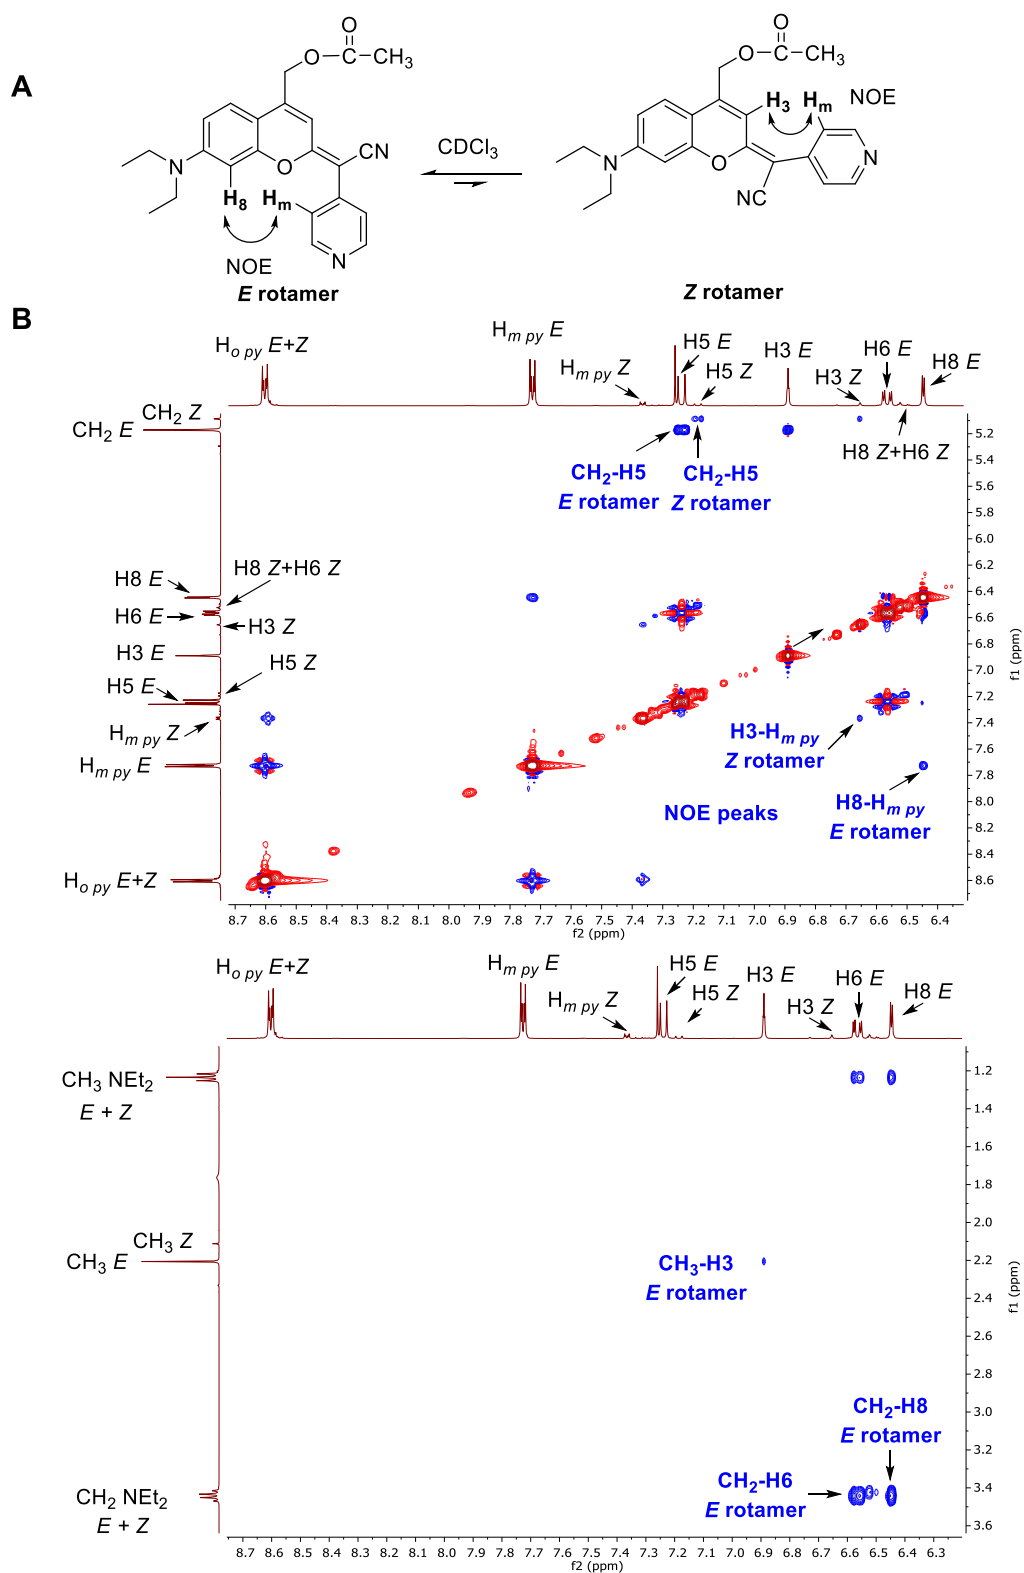

**Figure S3.** Structure of *E* and *Z* rotamers of coumarin **13** with some diagnostic NOE cross-peaks indicated, and expansions of the NOESY spectrum of **13** in  $\text{CDCl}_3$  at 298 K showing some characteristic NOE cross-peaks.

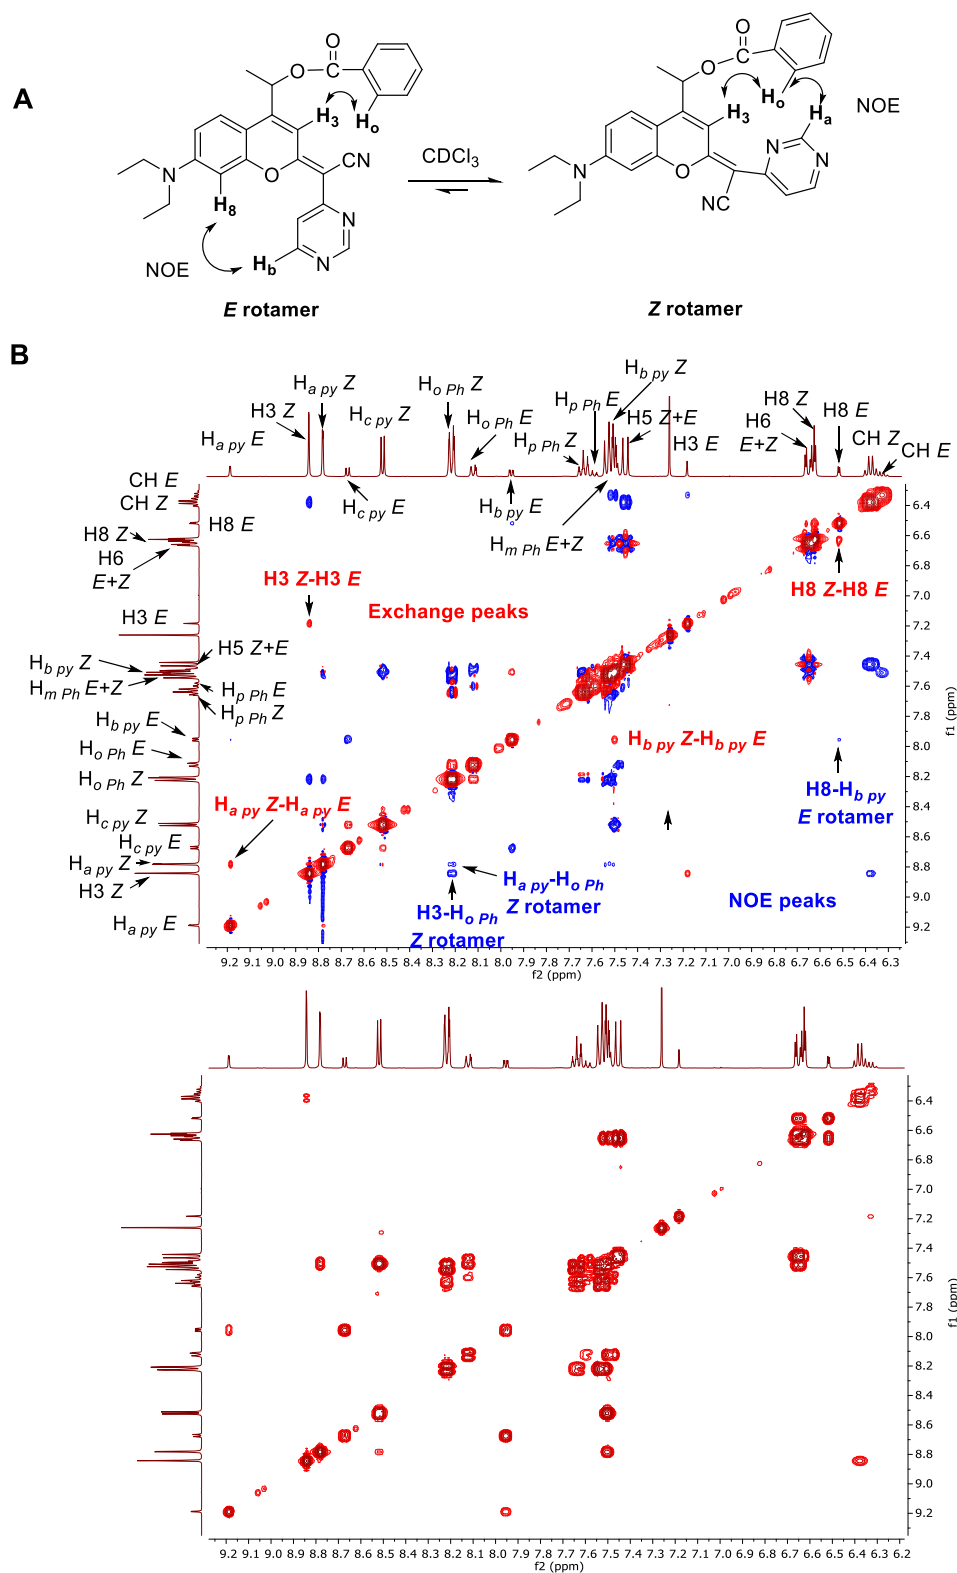

**Figure S4.** Structure of *E* and *Z* rotamers of coumarin **14** with some diagnostic NOE cross-peaks indicated, and expansions of the NOESY spectrum showing some characteristic NOE cross-peaks and exchange cross-peaks between rotamer resonances of the same sign as the diagonal (top) and of the COSY spectrum (bottom) of **14** in  $\text{CDCl}_3$  at 298 K.

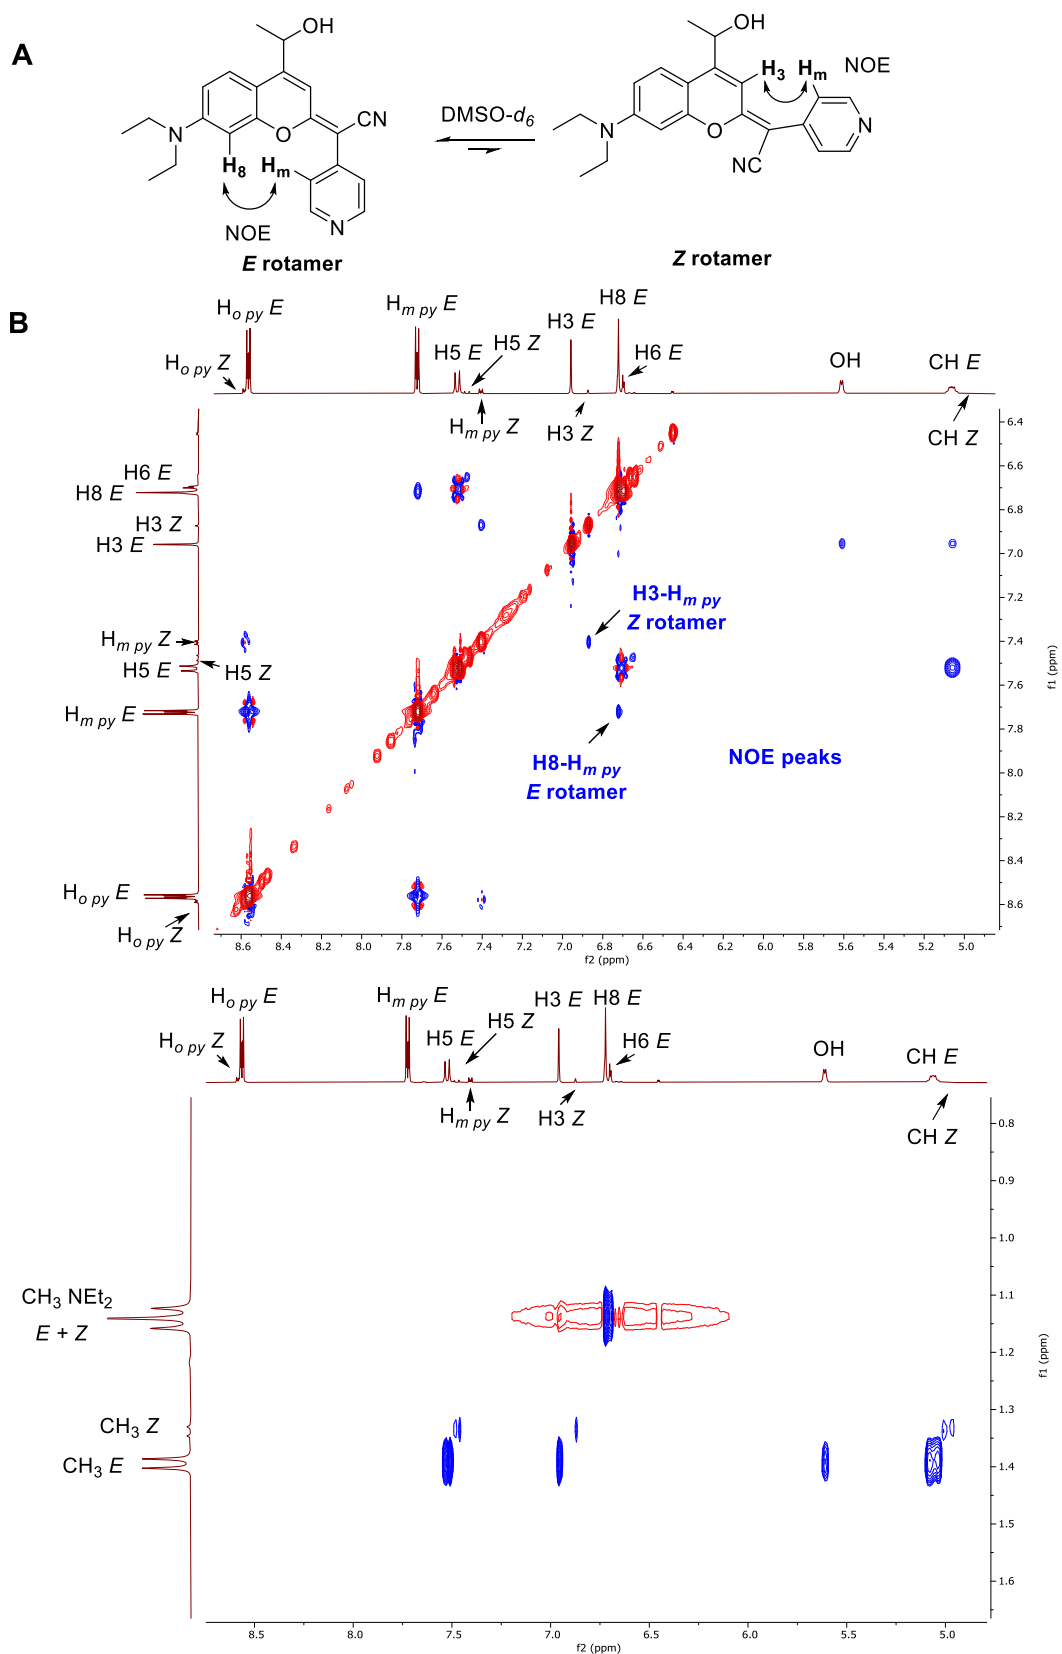

**Figure S5.** Structure of *E* and *Z* rotamers of coumarin **17** with some diagnostic NOE cross-peaks indicated, and expansions of the NOESY spectrum of **17** in DMSO- $d_6$  at 298 K showing some characteristic NOE cross-peaks.

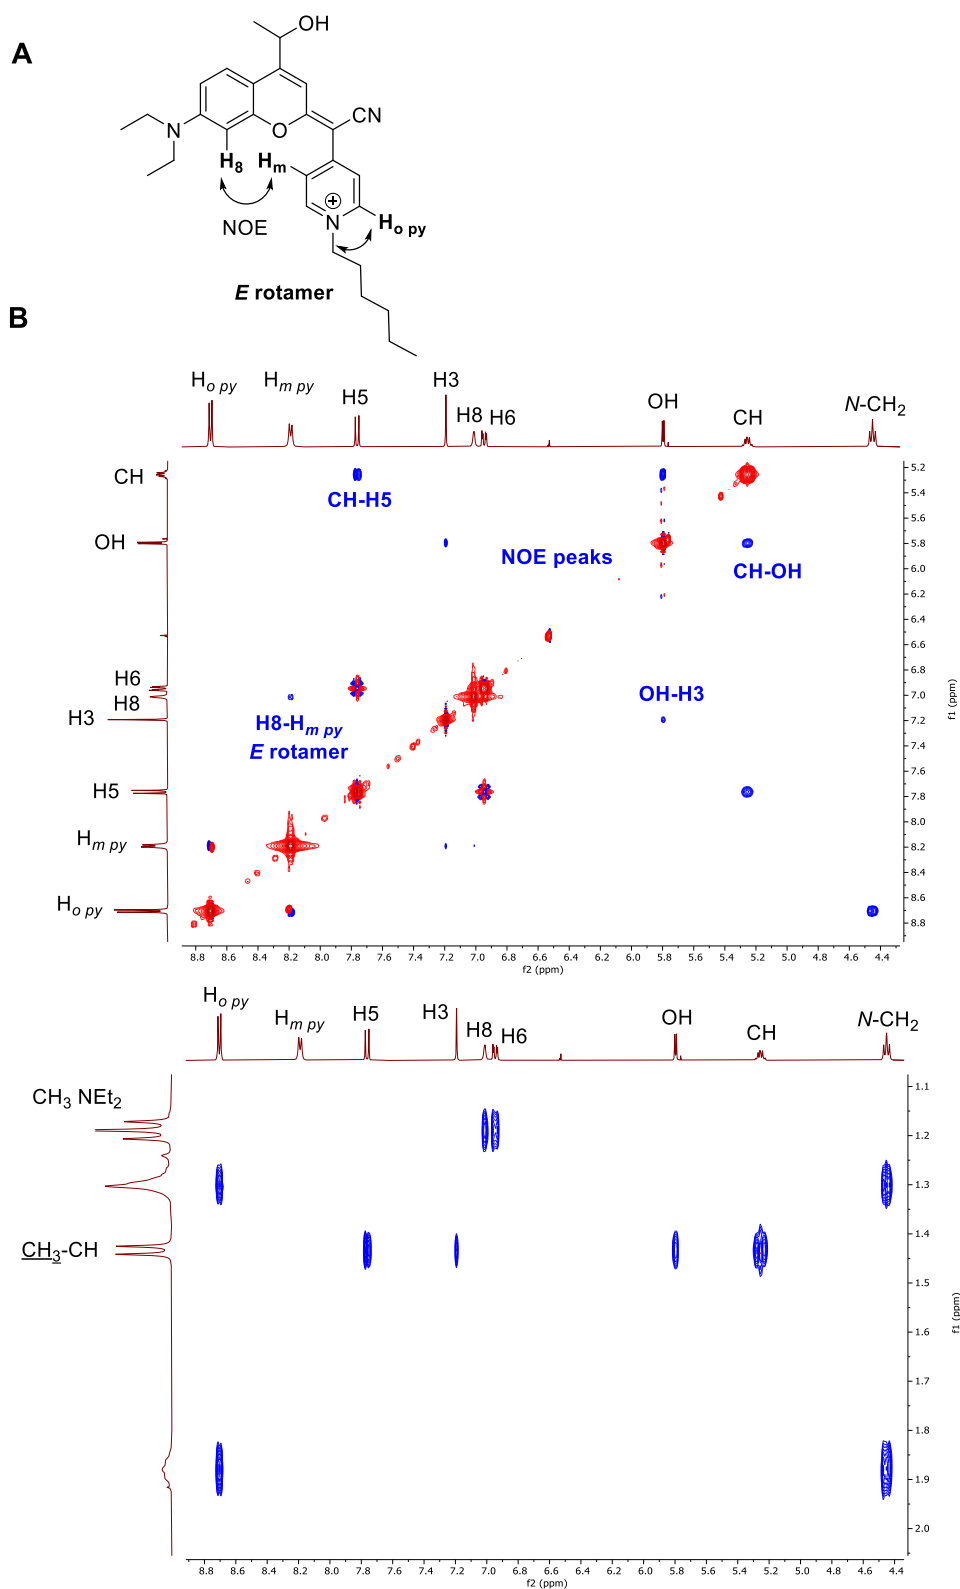

**Figure S6.** Structure of *E* rotamer of coumarin **18** with some diagnostic NOE cross-peaks indicated, and expansions of the NOESY spectrum of **18** in DMSO- $d_6$  at 298 K showing some characteristic NOE cross-peaks.



### 3.- 2D NMR characterization of COUPY-caged compounds (4-8).

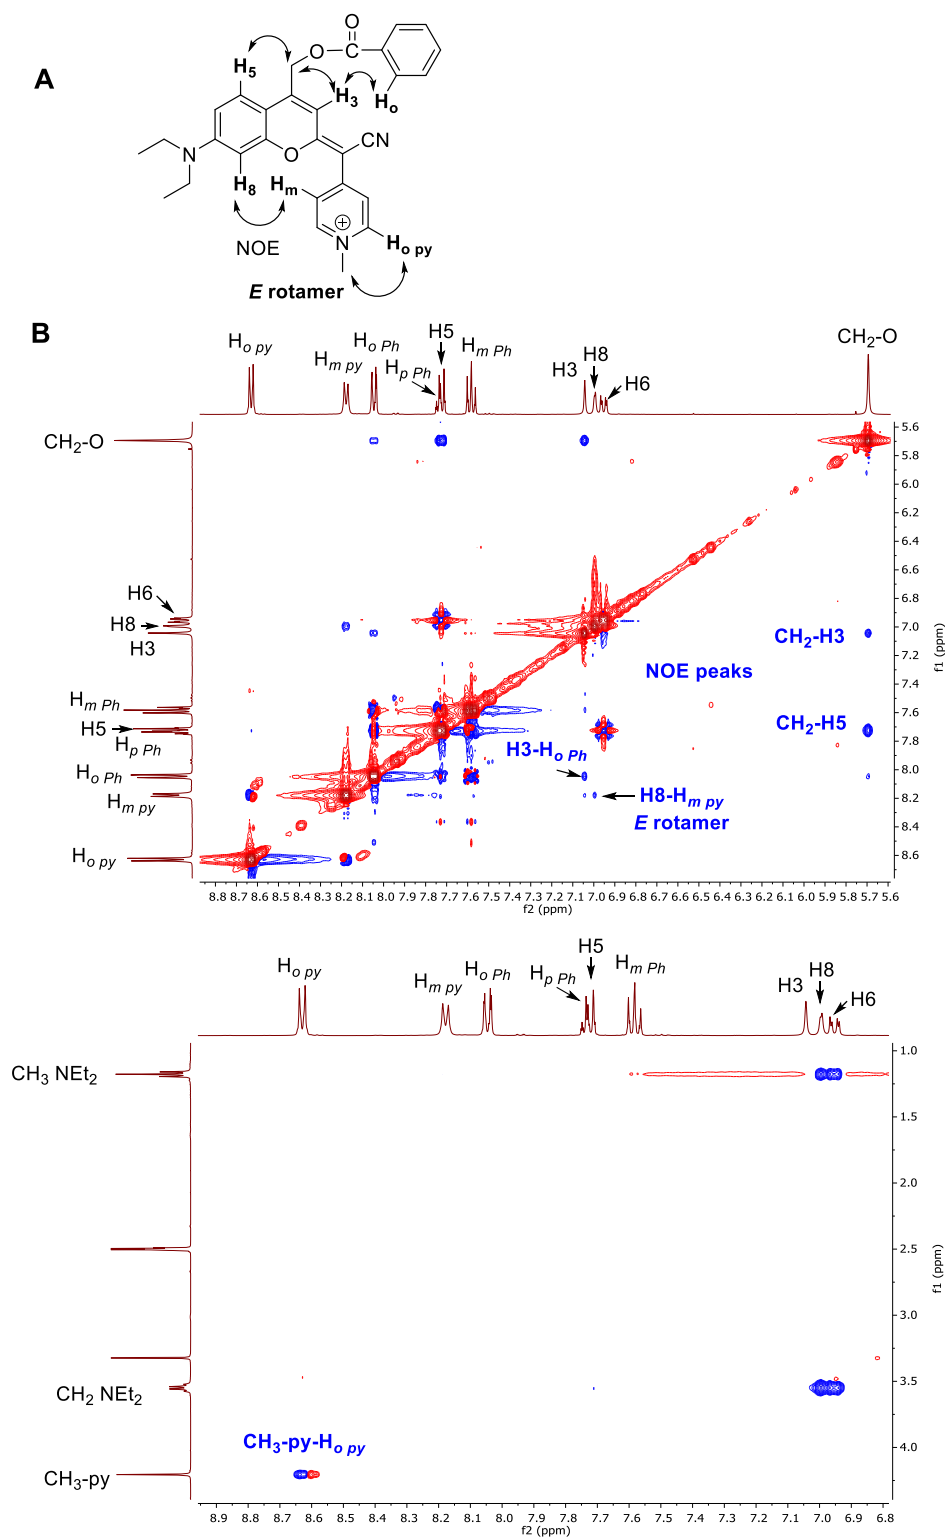

**Figure S7.** Structure of *E* rotamer of COUPY-caged compound **4** with some diagnostic NOE cross-peaks indicated, and expansions of the NOESY spectrum of **4** in DMSO-*d*<sub>6</sub> at 298 K showing some characteristic NOE cross-peaks.

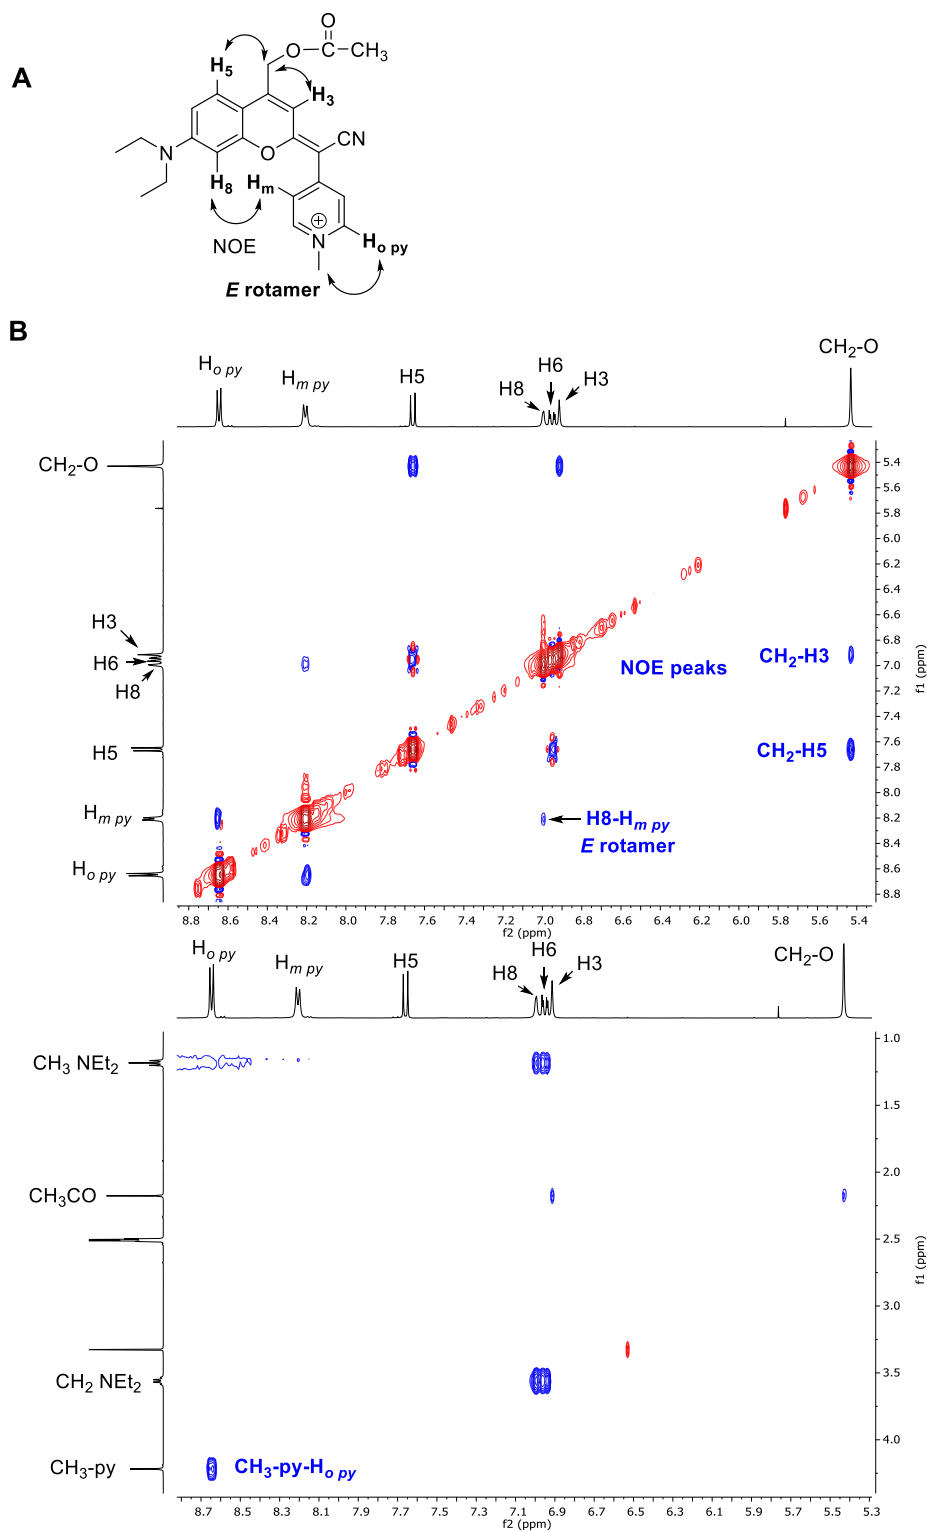

**Figure S8.** Structure of *E* rotamer of COUPY-caged compound **5** with some diagnostic NOE cross-peaks indicated, and expansions of the NOESY spectrum of **5** in DMSO-*d*<sub>6</sub> at 298 K showing some characteristic NOE cross-peaks.

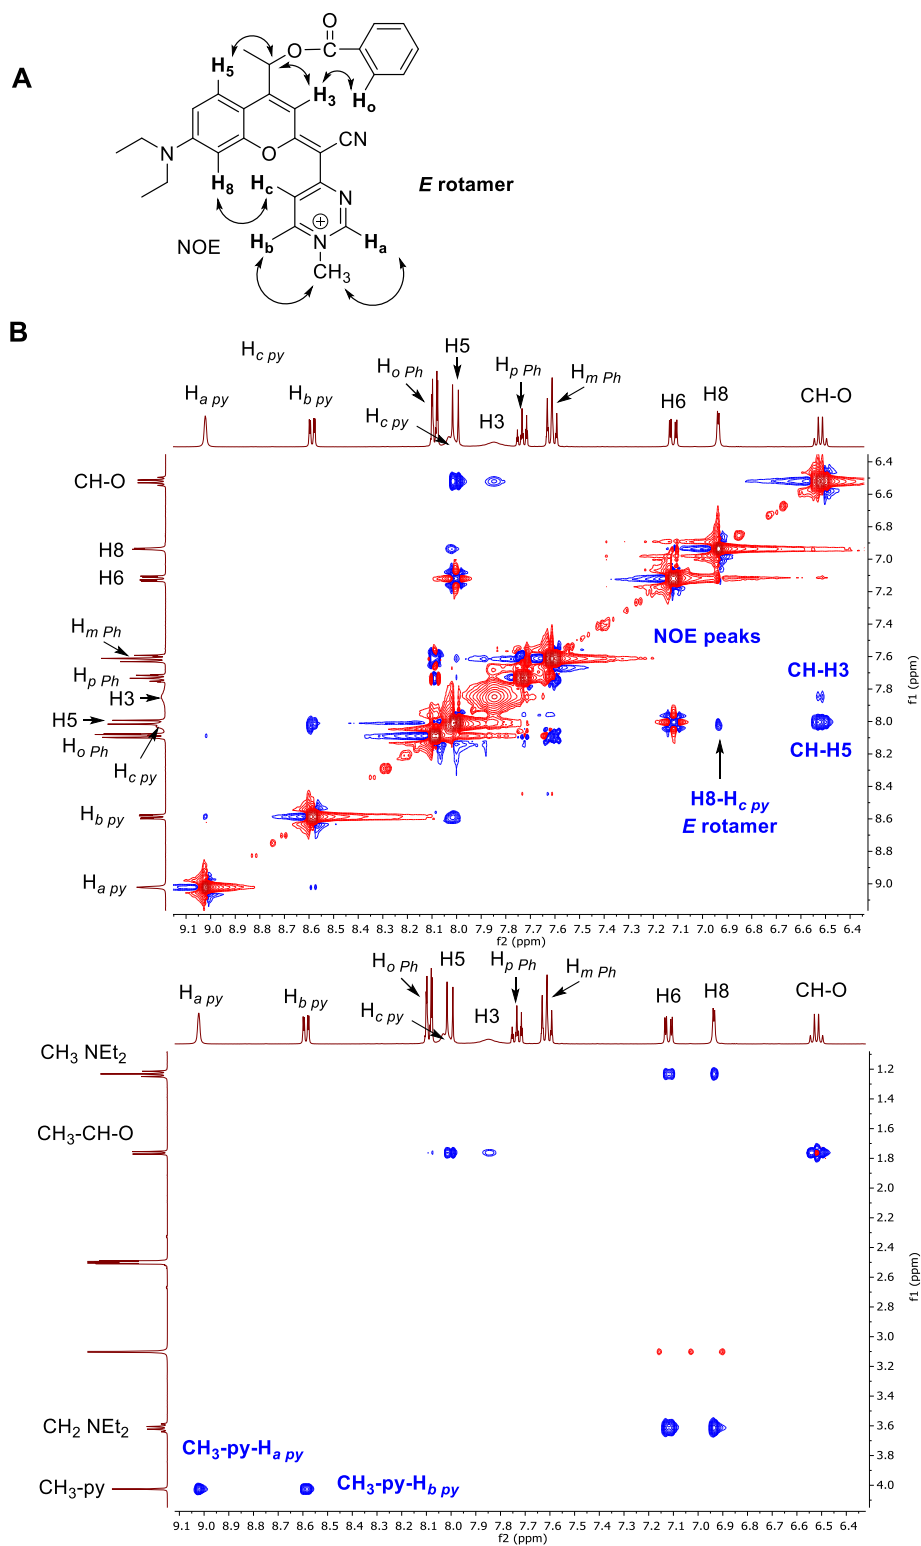

**Figure S9.** Structure of *E* rotamer of COUPY-caged compound **6** with some diagnostic NOE cross-peaks indicated, and expansions of the NOESY spectrum of **6** in DMSO-*d*<sub>6</sub> at 348 K showing some characteristic NOE cross-peaks.

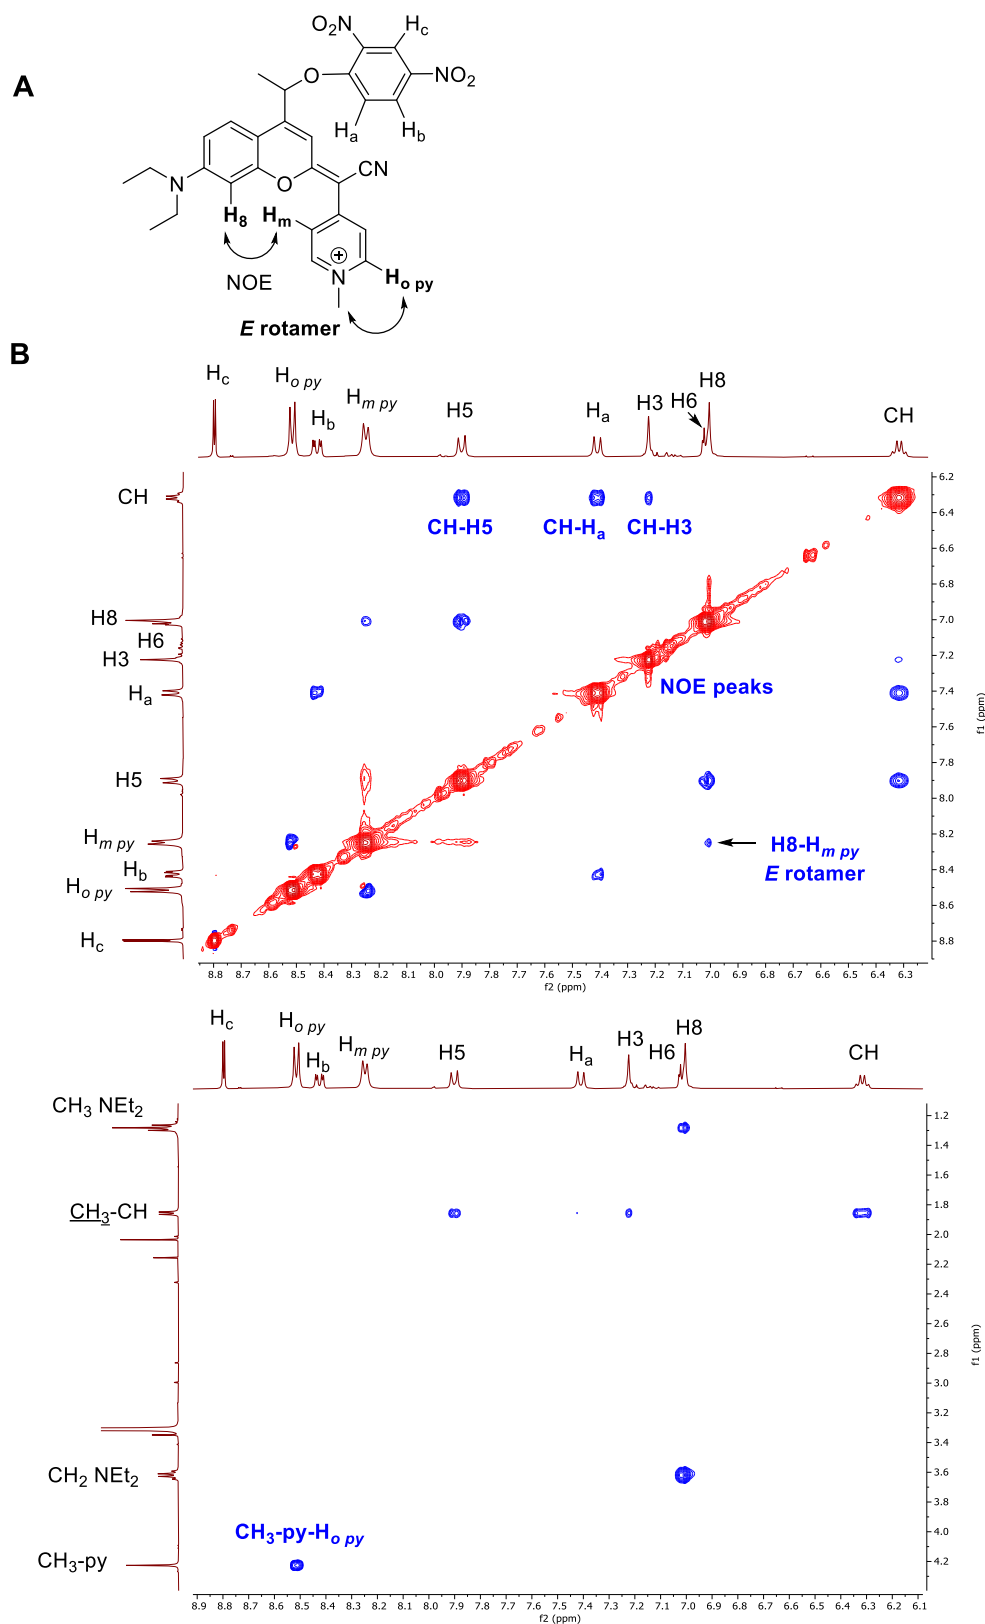

**Figure S10.** Structure of *E* rotamer of COUPY-caged compound **7** with some diagnostic NOE cross-peaks indicated, and expansions of the NOESY spectrum of **7** in CD<sub>3</sub>OD at 298 K showing some characteristic NOE cross-peaks.

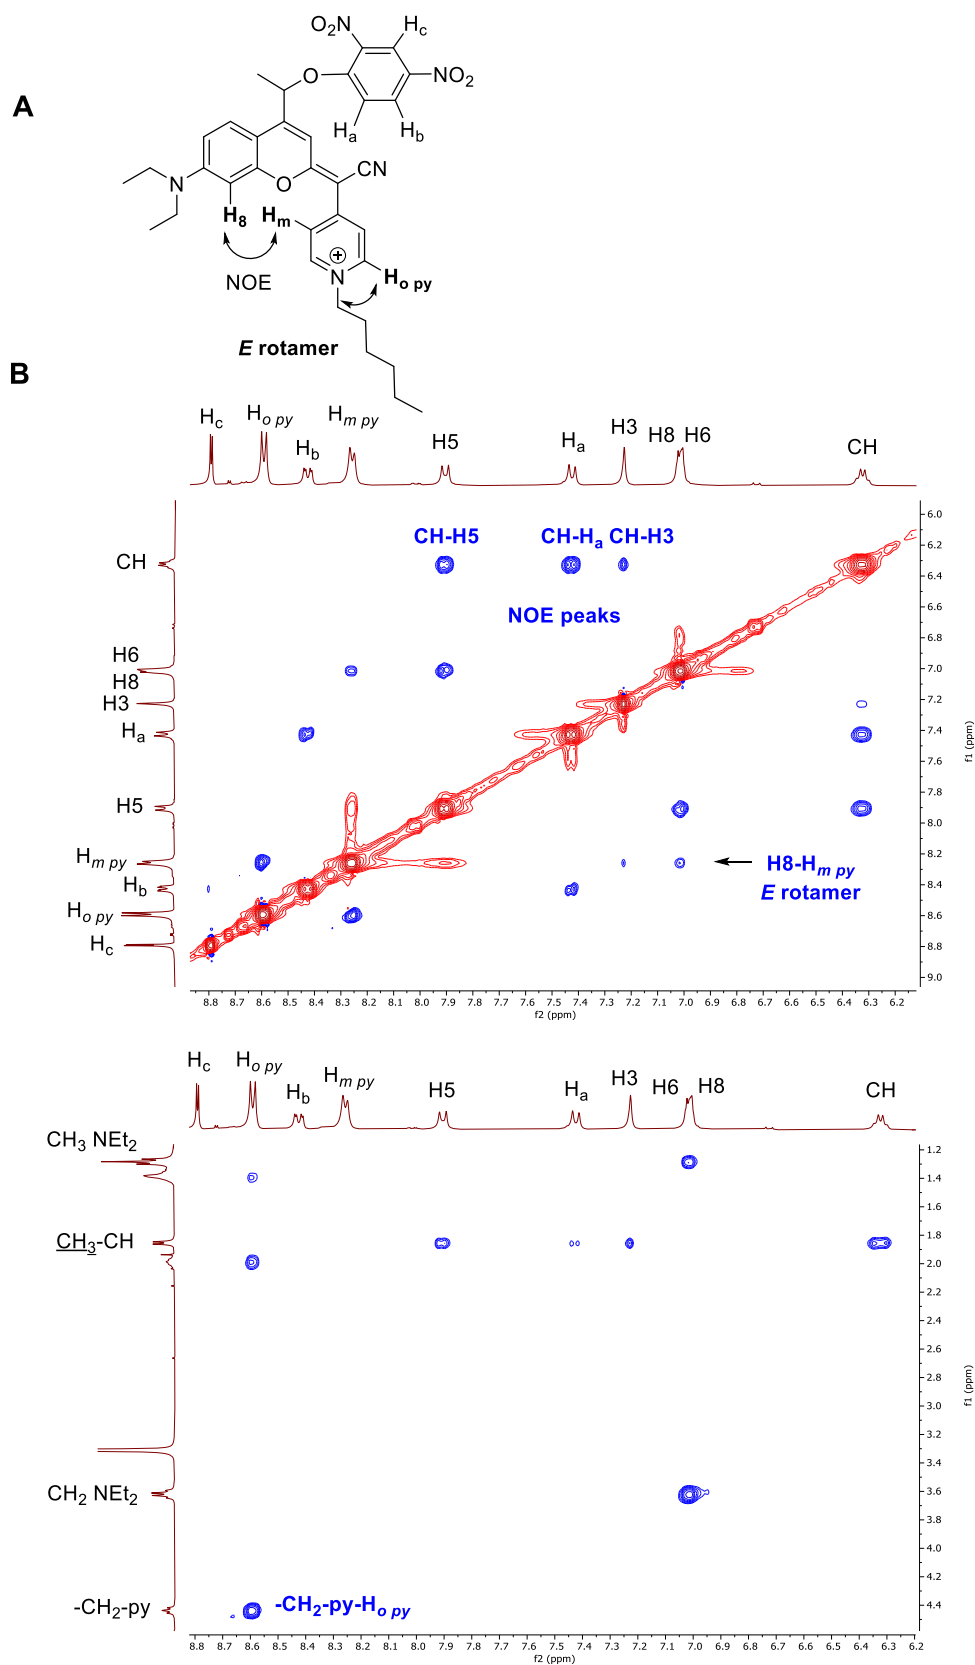

#### 4.- Irradiation experiments.

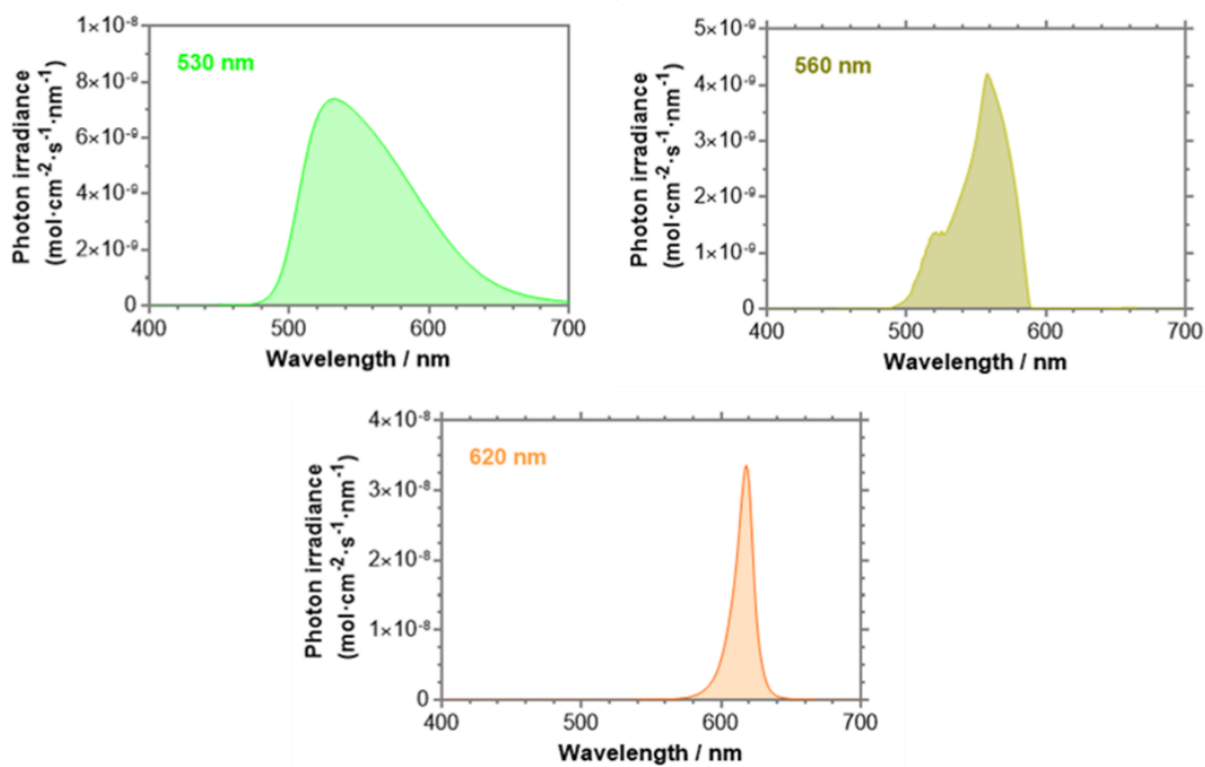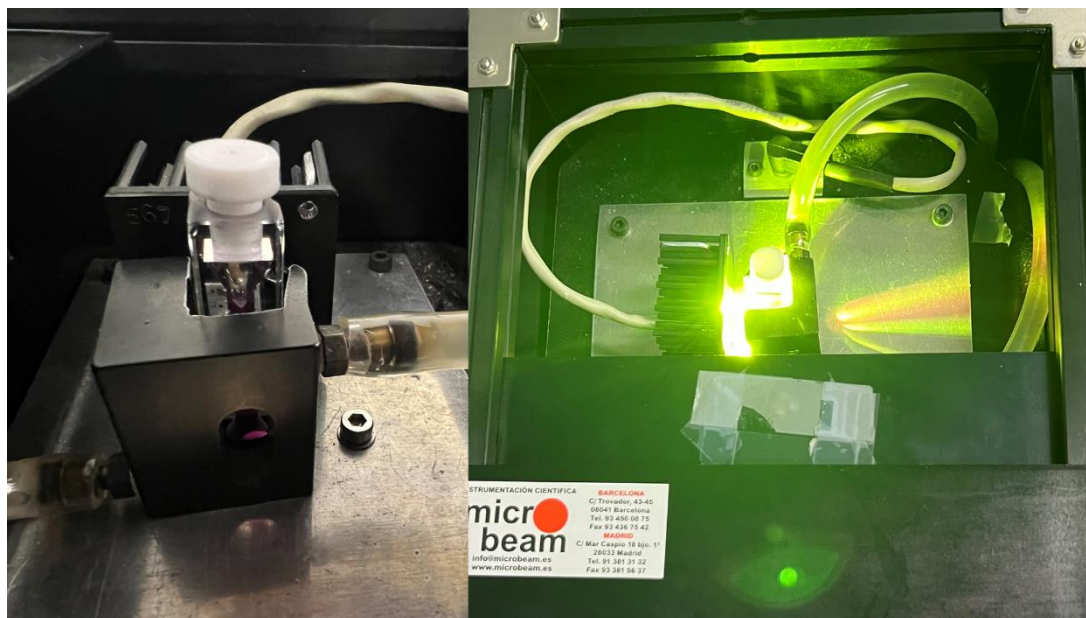

**Figure S12.** Photon spectral irradiance of the LEDs used in this work (top) and photographs of the custom-built irradiation setup used for uncaging experiments (bottom).

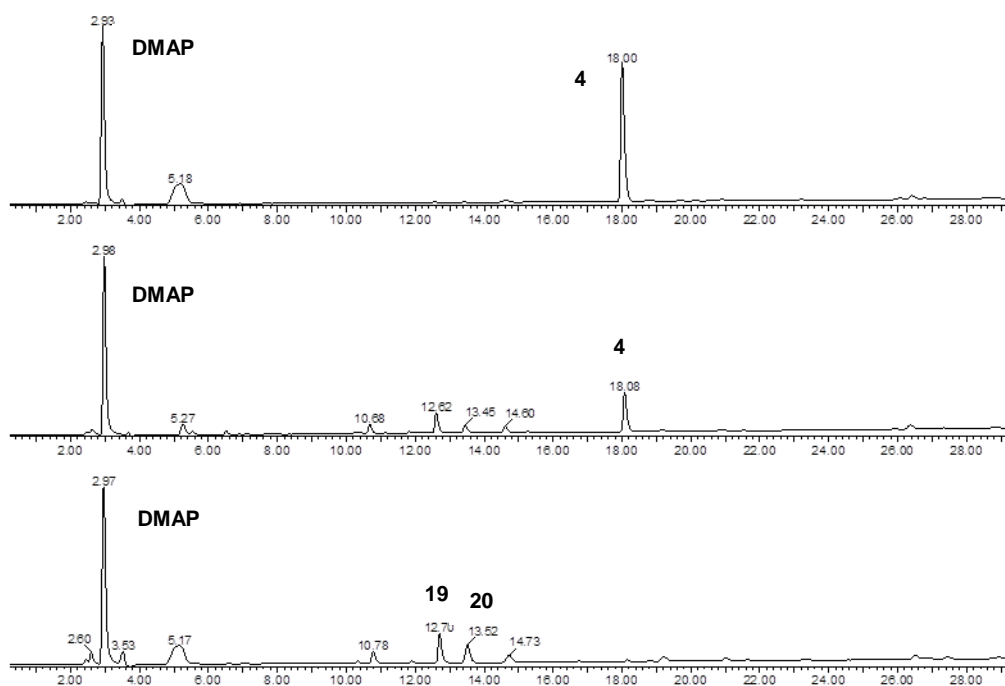

**Figure S13.** Reversed-phase HPLC-ESI MS traces at 260 nm for the photolysis reaction of **4** in a 1:1 (v/v) mixture of PBS buffer and ACN in the presence of DMAP (internal standard) at  $t=0$  (top) and after irradiation with visible LED light (470-750 nm range, centered at 530 nm) for 15 min (middle) and 60 min (bottom) at 37 °C.

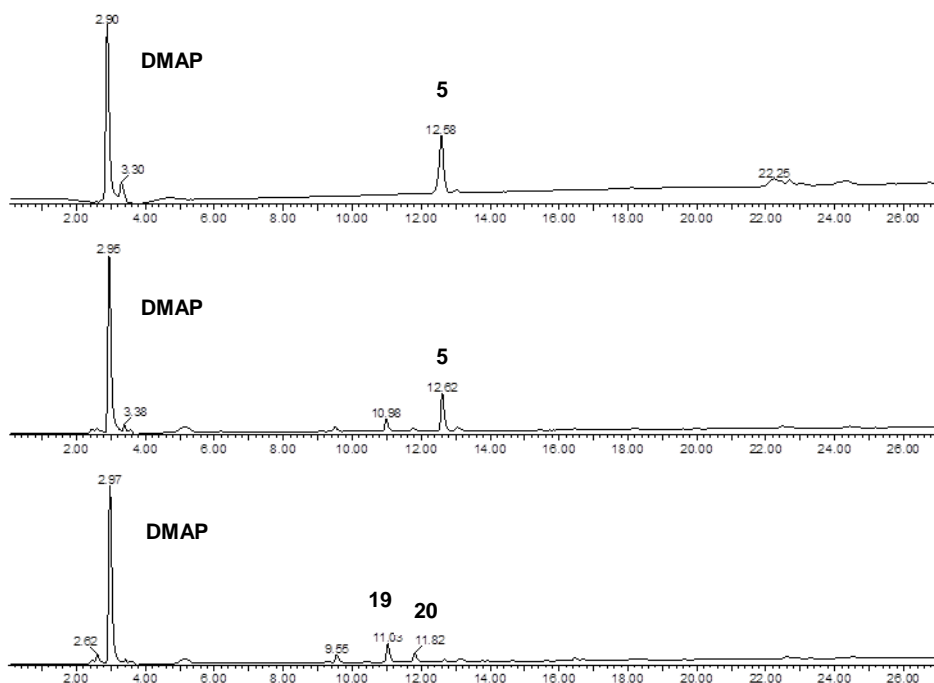

**Figure S14.** Reversed-phase HPLC-ESI MS traces at 260 nm for the photolysis reaction of **4** in a 1:1 (v/v) mixture of PBS buffer and ACN in the presence of DMAP (internal standard) at  $t=0$  (top) and after irradiation with visible LED light (470-750 nm range, centered at 530 nm) for 15 min (middle) and 60 min (bottom) at 37 °C.

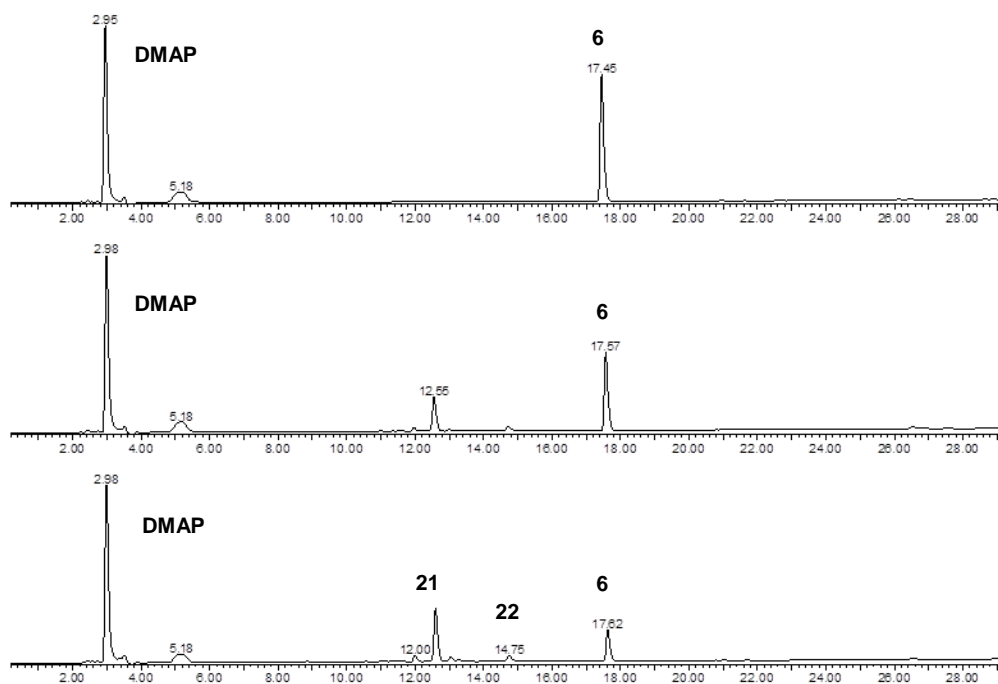

**Figure S15.** Reversed-phase HPLC-ESI MS traces at 260 nm for the photolysis reaction of **6** in a 1:1 (v/v) mixture of PBS buffer and ACN in the presence of DMAP (internal standard) at  $t=0$  (top) and after irradiation with visible LED light (470-750 nm range, centered at 530 nm) for 30 min (middle) and 60 min (bottom) at 37 °C.

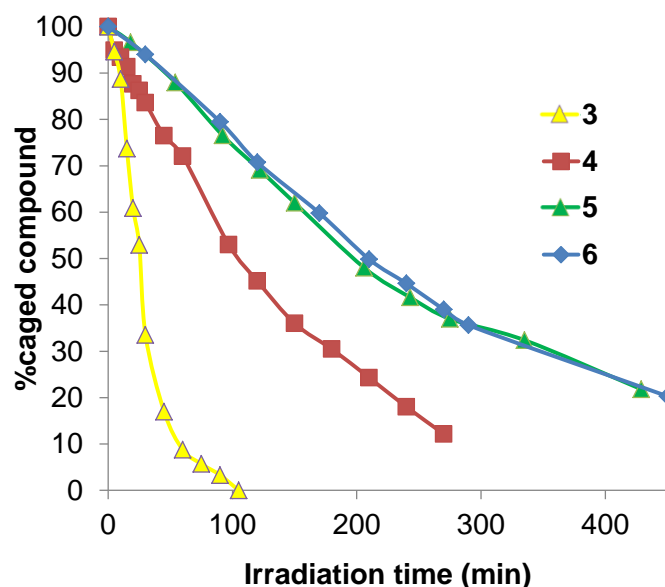

**Figure S16.** Plot of the temporal evolution of the amounts of COUPY-caged compounds **3-6** after irradiation with yellow light ( $560 \pm 40$  nm;  $40 \text{ mW cm}^{-2}$ ). The lines connecting the experimental points are meant to aid the reader in visualizing the data. All the experiments were performed in a 1:1 (v/v) mixture of PBS buffer and ACN at 37 °C.



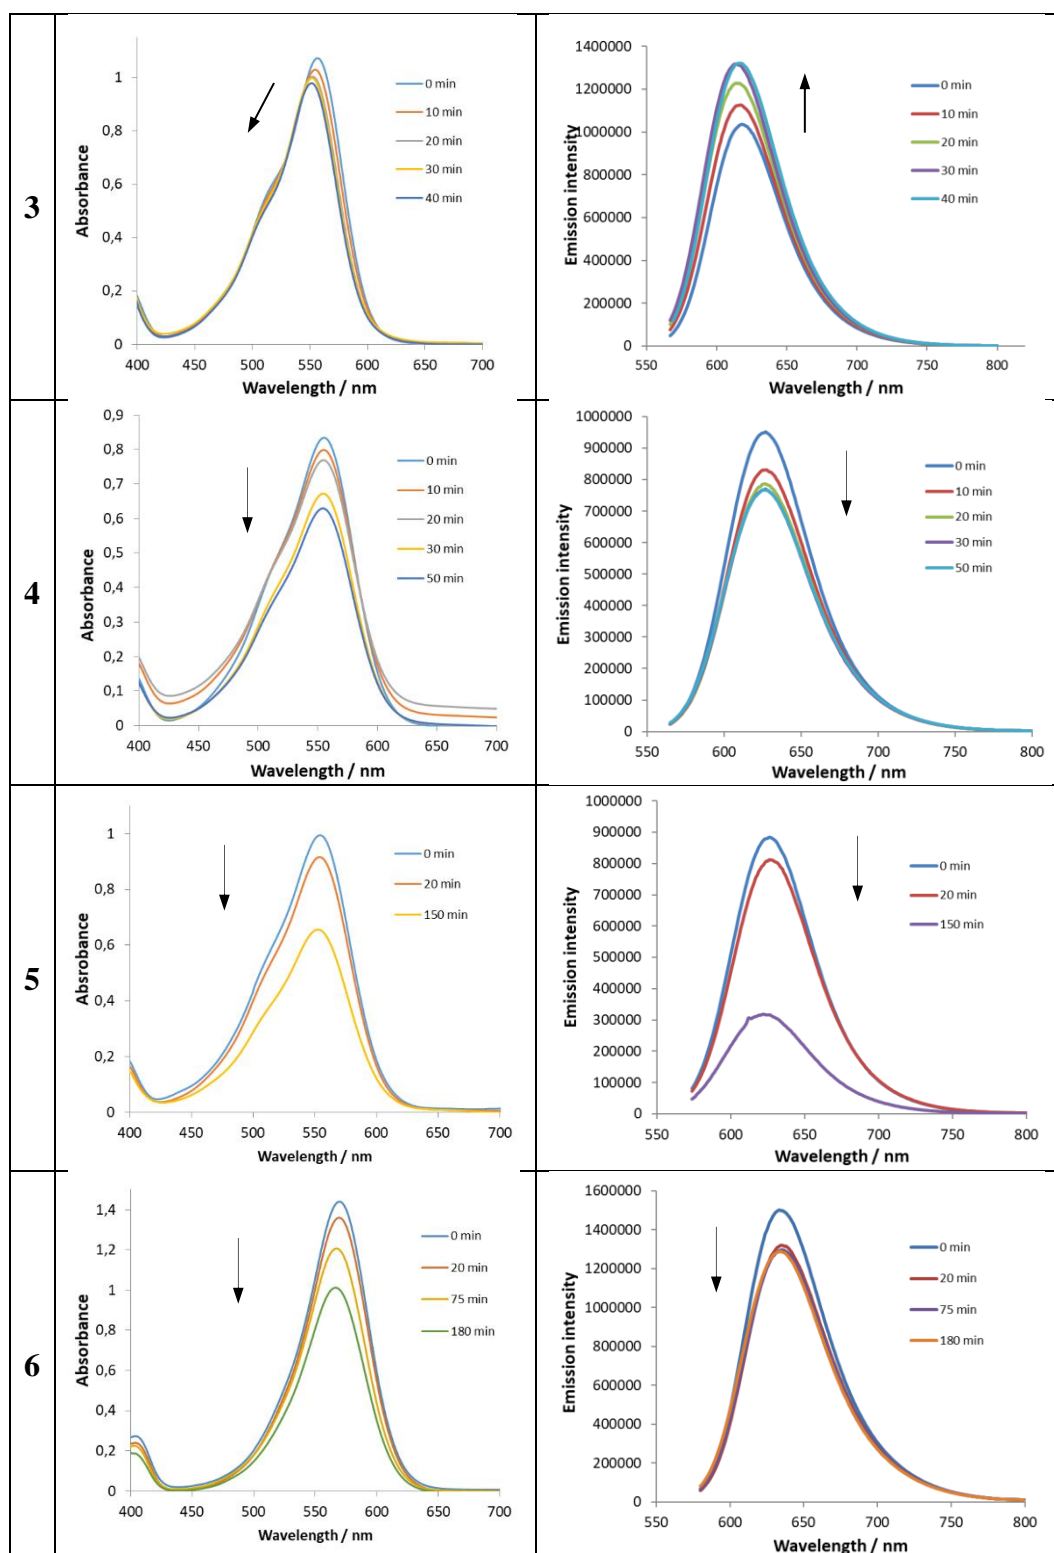

**Figure S17.** Temporal evolution of the solution absorbance and emission intensity of COUPY caged compounds **3-6** upon illumination with a LED source covering from the cyan to the far-red region of the visible spectrum (470–750 nm; 150 mW cm<sup>-2</sup>). All the experiments were performed in a 1:1 (v/v) mixture of PBS buffer and ACN at 37 °C.

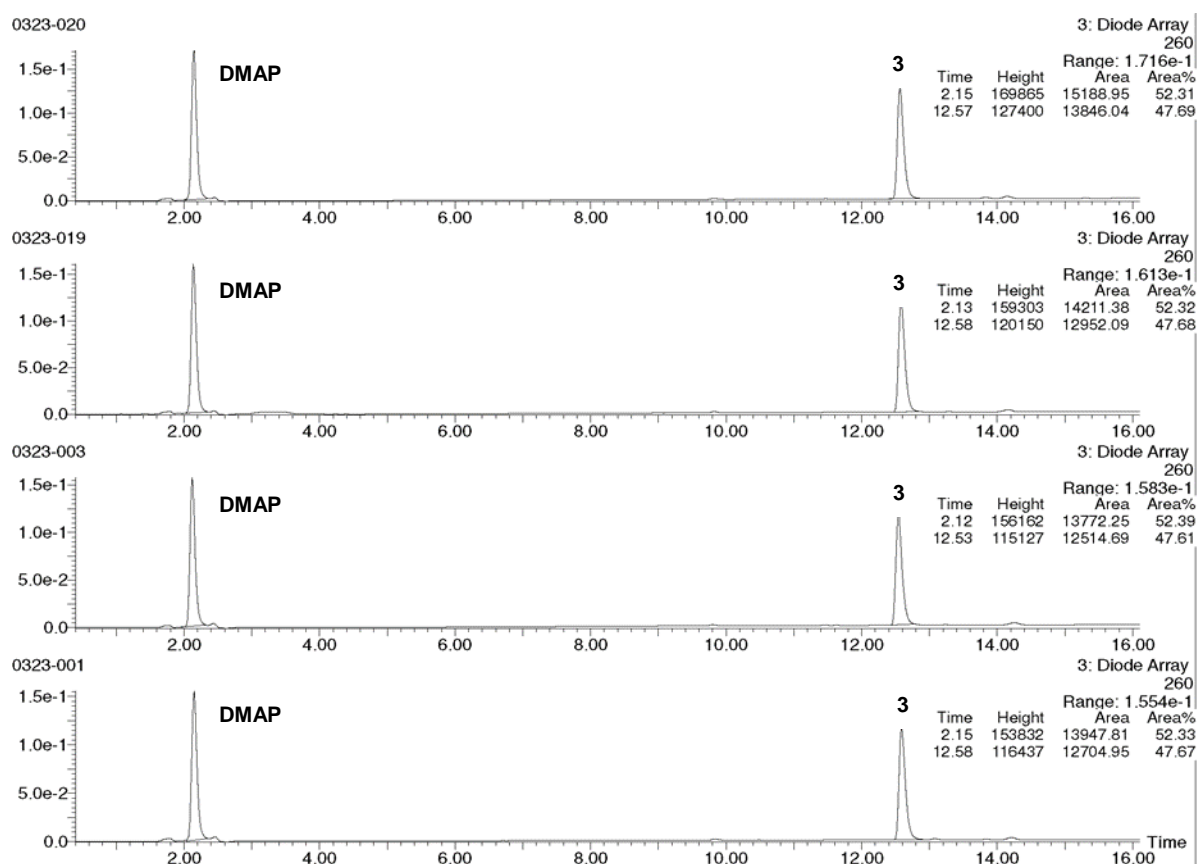

**Figure S18.** Reversed-phase HPLC-ESI MS traces at 260 nm of COUPY-caged compound **3** after standing for different times in the dark at 37 °C in a 1:1 (v/v) mixture of PBS buffer and ACN in the presence of DMAP (internal standard). From bottom to top:  $t = 0, 2, 4$  h and 5 h.

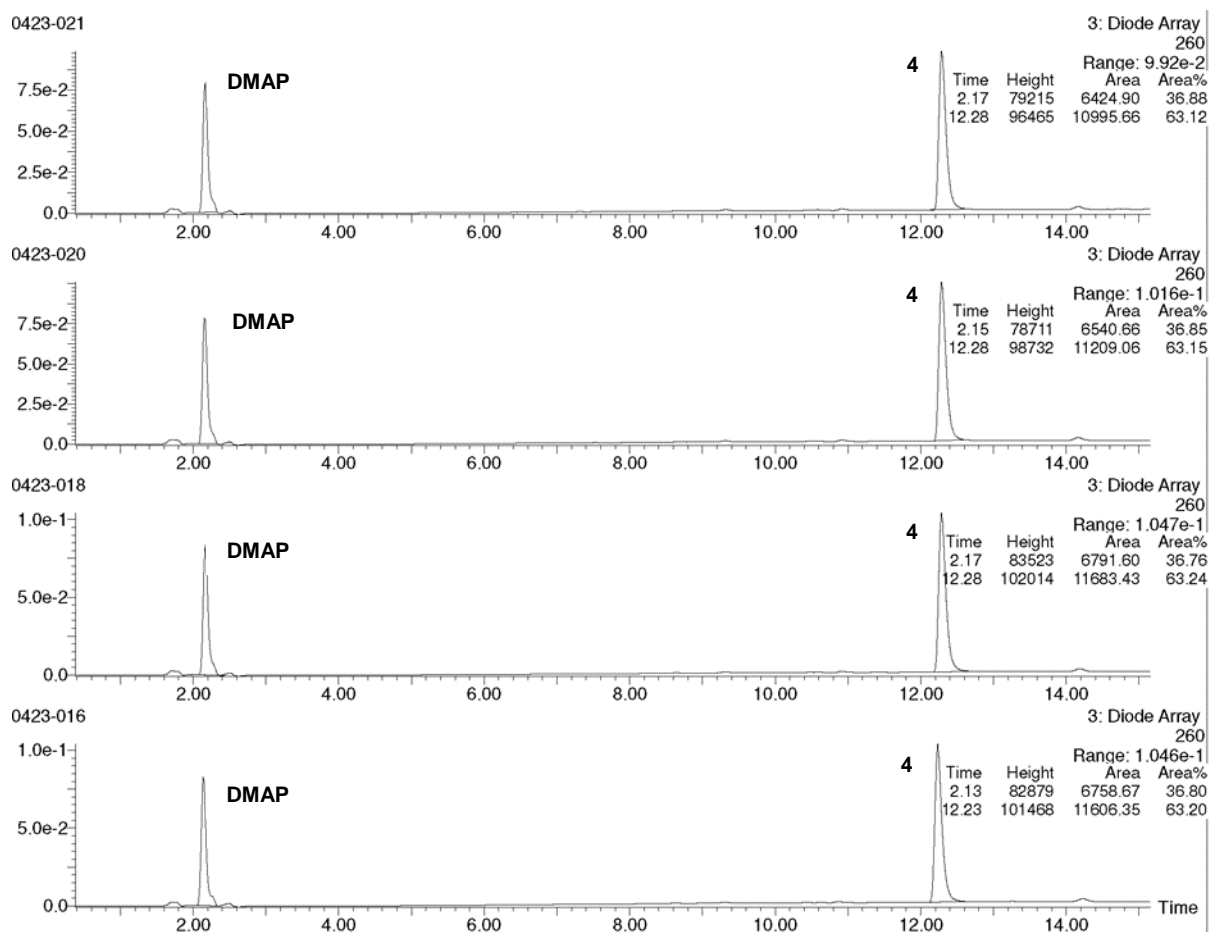

**Figure S19.** Reversed-phase HPLC-ESI MS traces at 260 nm of COUPY-caged compound **4** after standing for different times in the dark at 37 °C in a 1:1 (v/v) mixture of PBS buffer and ACN in the presence of DMAP (internal standard). From bottom to top: t = 0, 2 h, 4 h and 5 h.

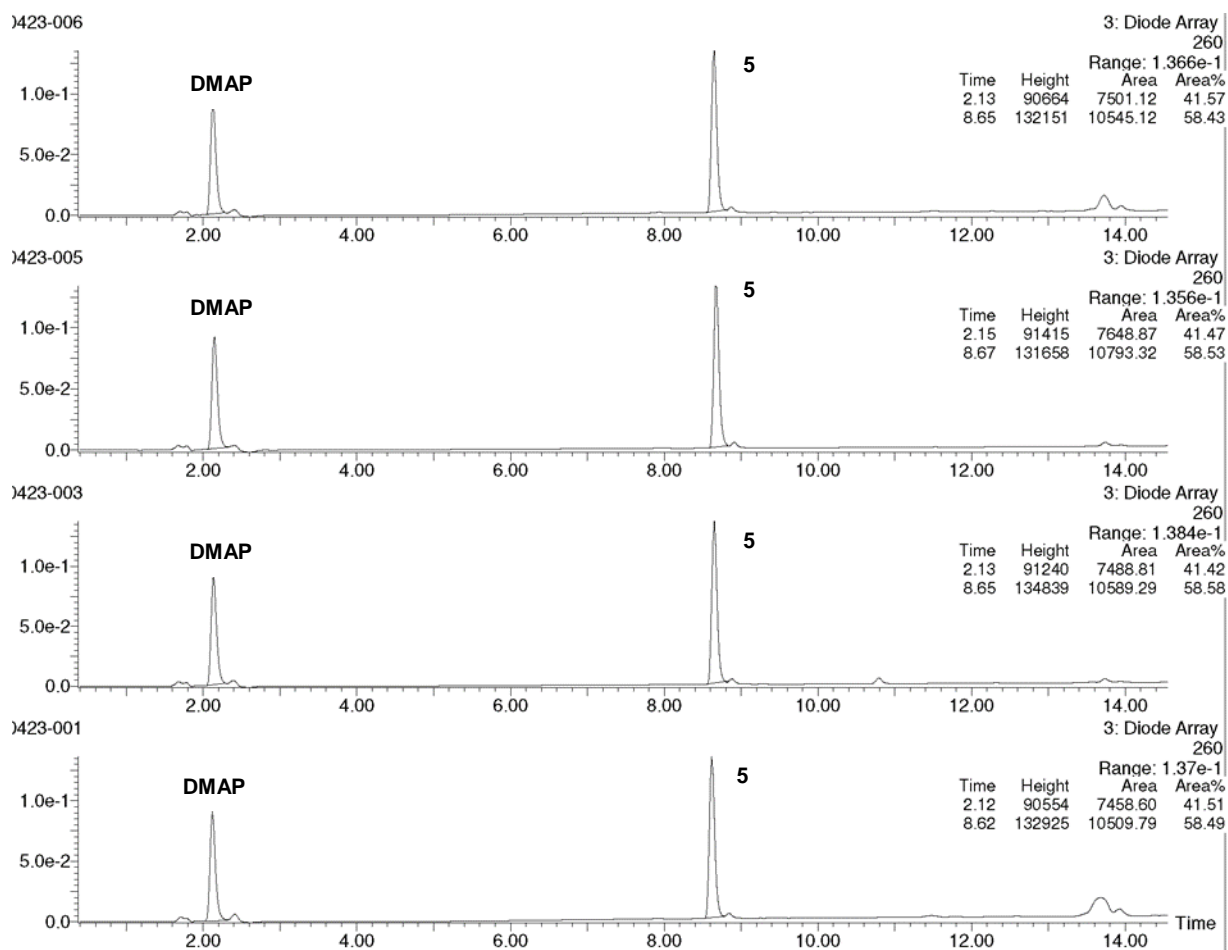

**Figure S20.** Reversed-phase HPLC-ESI MS traces at 260 nm of COUPY-caged compound **5** after standing for different times in the dark at 37 °C in a 1:1 (v/v) mixture of PBS buffer and ACN in the presence of DMAP (internal standard). From bottom to top:  $t = 0, 2$  h, 4 h and 5 h.

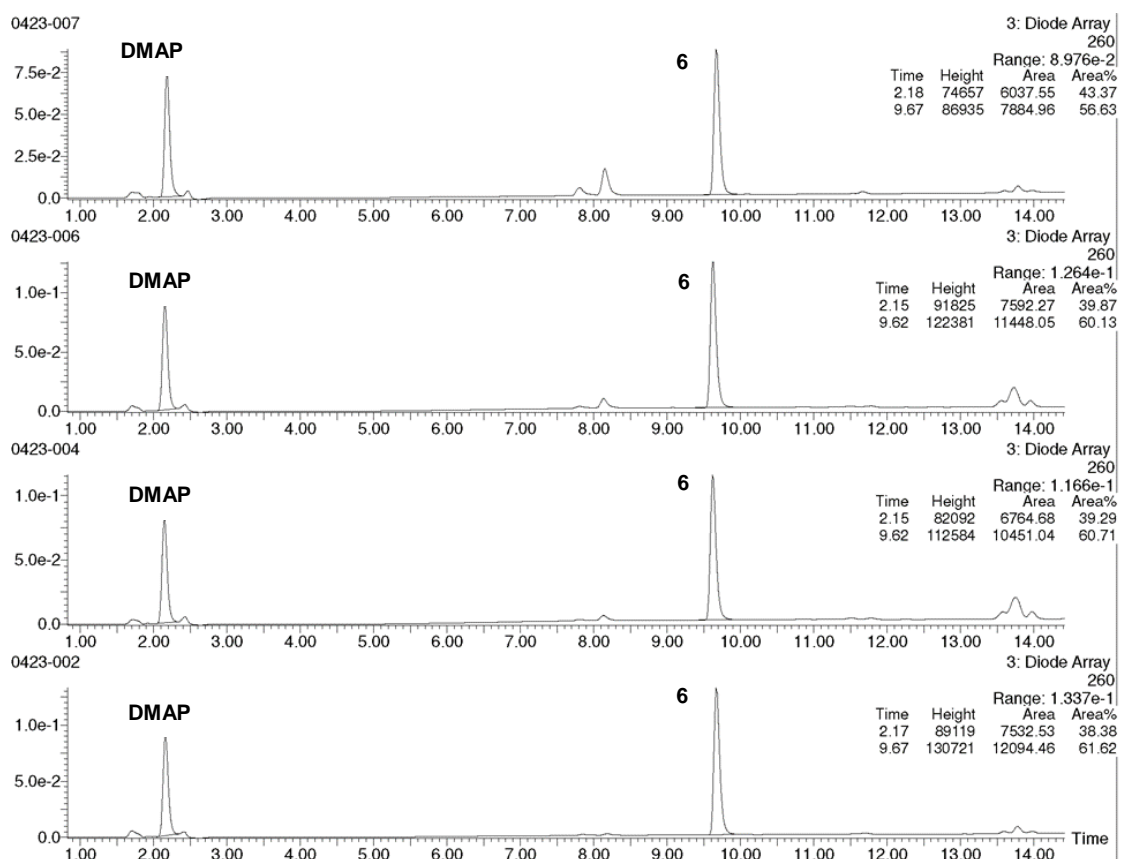

**Figure S21.** Reversed-phase HPLC-ESI MS traces at 260 nm of COUPY-caged compound **6** after standing for different times in the dark at 37 °C in a 1:1 (v/v) mixture of PBS buffer and ACN in the presence of DMAP (internal standard). From bottom to top:  $t = 0, 2, 4$  h and 5 h.

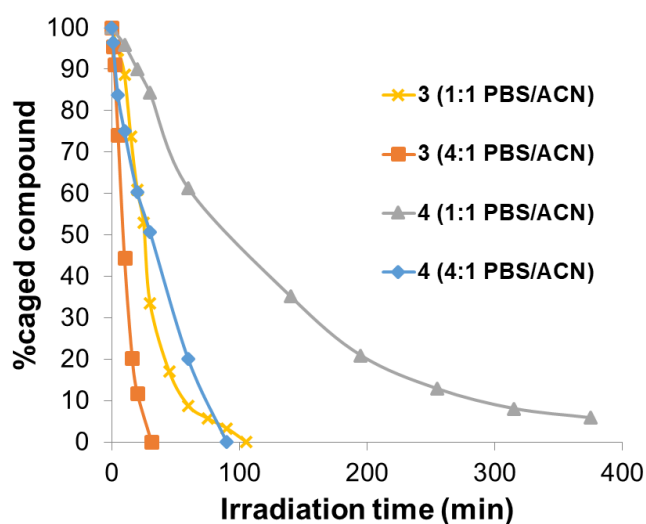

**Figure S22.** Plot of the temporal evolution of the amounts of COUPY-caged compounds **3** and **4** after irradiation with yellow light (560 ± 40 nm; 40 mW cm<sup>-2</sup>) in 1:1 or 4:1 (v/v) mixtures of PBS buffer and ACN at 37 °C. The lines connecting the experimental points are meant to aid the reader in visualizing the data.

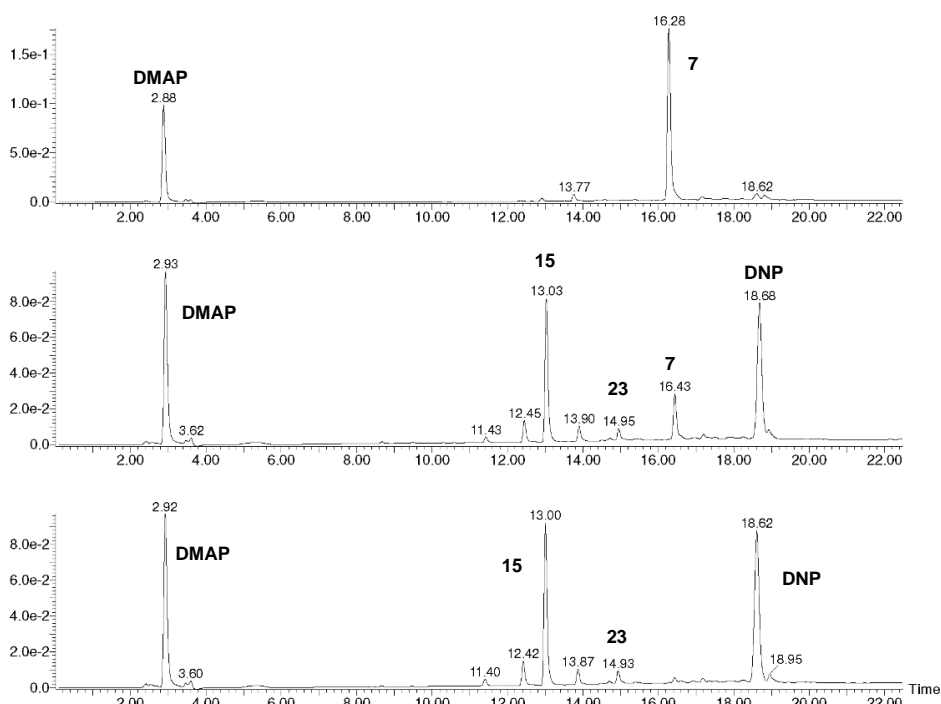

**Figure S23.** Reversed-phase HPLC-ESI MS traces at 260 nm for the photolysis reaction of **7** in a 1:1 (v/v) mixture of PBS buffer and ACN in the presence of DMAP (internal standard) at  $t=0$  (top) and after irradiation with visible LED light (470-750 nm range, centered at 530 nm) for 9 min (middle) and 25 min (bottom) at 37 °C.

**Table S1.** MS data for coumarin photoproducts generated upon photoactivation of compound **7**. Data was obtained from HPLC-ESI MS analysis after 25 min of irradiation (Figure S23).

| Peak (min) | % relative | $\lambda_{\max}$ | $m/z$ | Compound  |
|------------|------------|------------------|-------|-----------|
| 11.4       | 8.1        | 379              | 380   | -         |
| 12.4       | 10.5       | 552              | 417   | -         |
| 13.0       | 70.8       | 552              | 376   | <b>15</b> |
| 13.9       | 6.4        | 567              | 374   | -         |
| 14.9       | 4.2        | 581              | 358   | <b>23</b> |

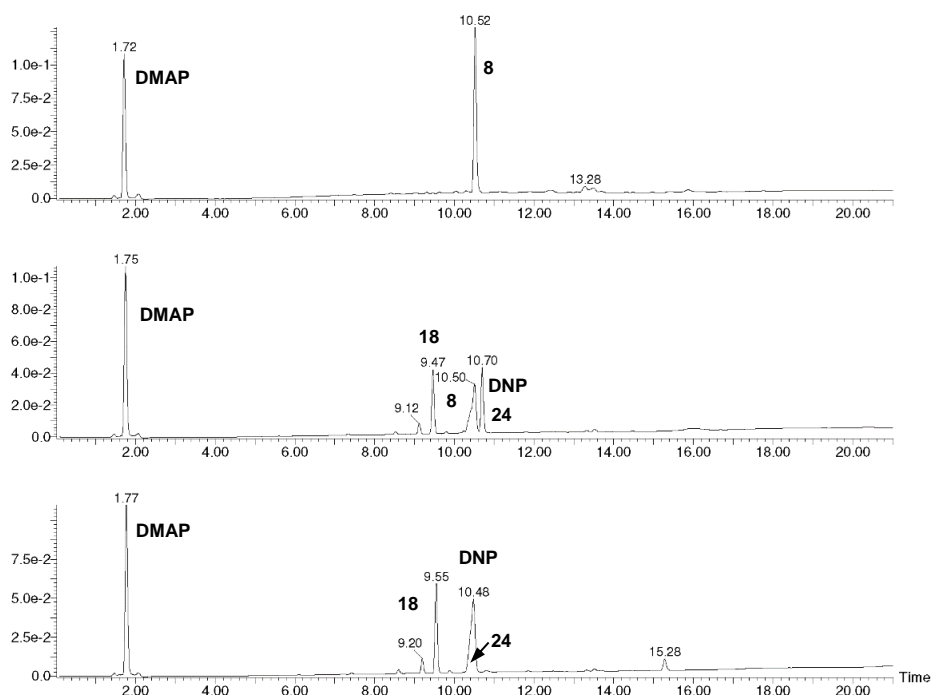

**Figure S24.** Reversed-phase HPLC-ESI MS traces at 260 nm for the photolysis reaction of **8** in a 1:1 (v/v) mixture of PBS buffer and ACN in the presence of DMAP (internal standard) at  $t=0$  (top) and after irradiation with visible LED light (470-750 nm range, centered at 530 nm) for 2 min (middle) and 8 min (bottom) at 37 °C.

**Table S2.** MS data for coumarin photoproducts generated upon photoactivation of compound **8**. Data was obtained from HPLC-ESI MS analysis after 8 min of irradiation (Figure S24). Since DNP and compound **24** co-elute, integration of coumarin photoproducts was carried out at 400 nm where DNP does not give signal.

| Peak (min) | % relative | $\lambda_{\max}$ | $m/z$ | Compound  |
|------------|------------|------------------|-------|-----------|
| 8.7        | 5.0        | 369              | 450   | -         |
| 9.2        | 11.7       | 555              | 487   | -         |
| 9.5        | 63.6       | 553              | 446   | <b>18</b> |
| 10.0       | 1.9        | 567              | 444   | -         |
| 10.5       | 11.9       | 582              | 428   | <b>24</b> |
| 10.7       | 5.9        | 565              | 612   | <b>8</b>  |

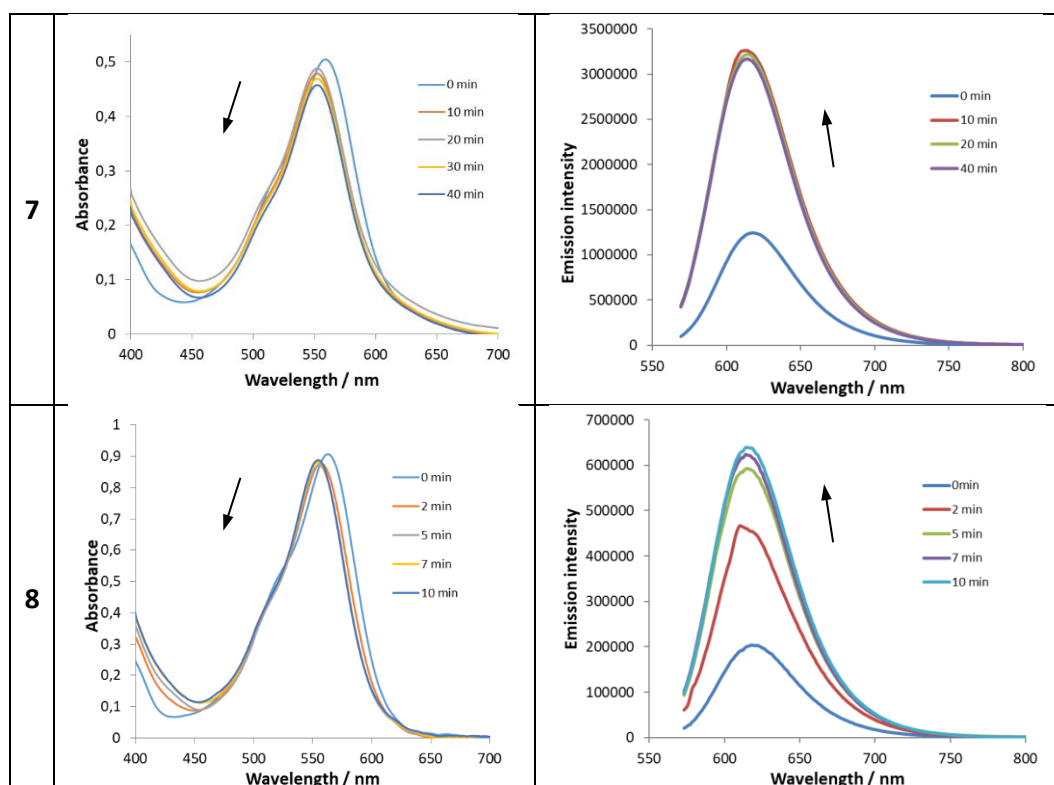

**Figure S25.** Temporal evolution of the solution absorbance and emission intensity of COUPY caged compounds **7-8** upon illumination with a LED source covering from the cyan to the far-red region of the visible spectrum (470–750 nm; 150 mW cm<sup>-2</sup>). All the experiments were performed in a 1:1 (v/v) mixture of PBS buffer and ACN at 37 °C.

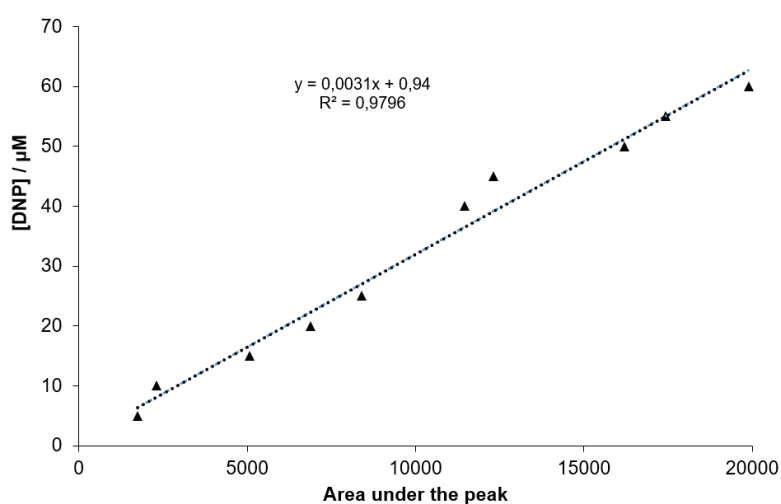

**Figure S26.** DNP calibration curve prepared for 5–60 μM concentration.



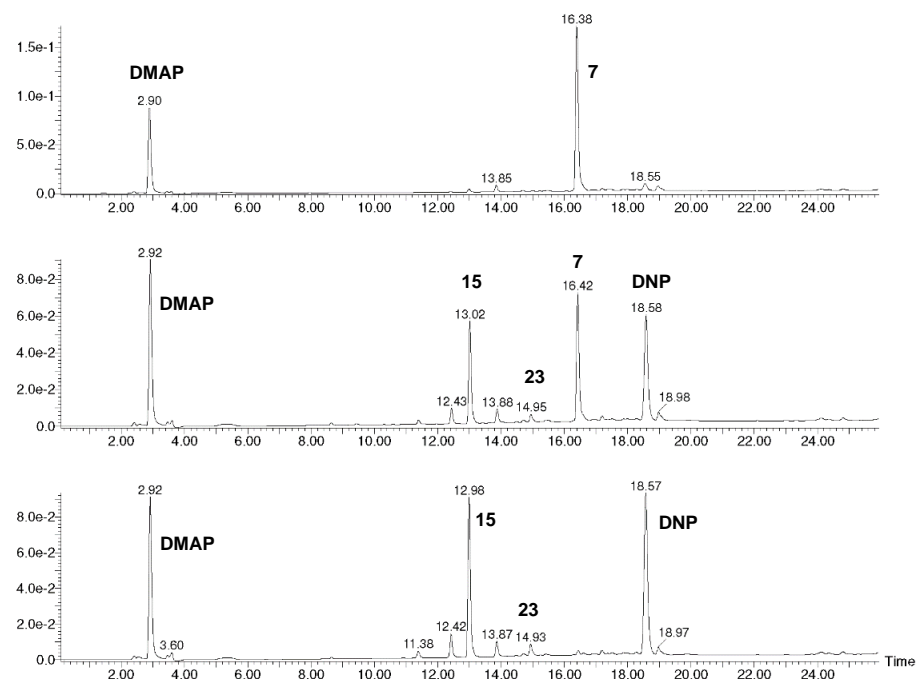

**Figure S27.** Reversed-phase HPLC-ESI MS traces at 260 nm for the photolysis reaction of **7** in a 1:1 (v/v) mixture of PBS buffer and ACN in the presence of DMAP (internal standard) at  $t=0$  (top) and after irradiation with red LED light (620 nm) for 22 min (middle) and 154 min (bottom) at 37 °C.

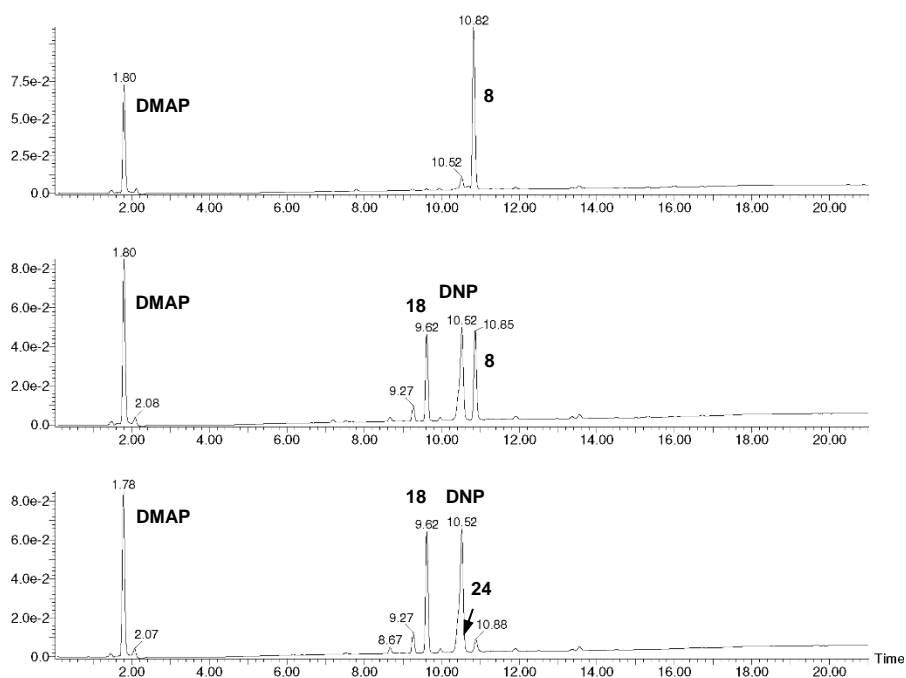

**Figure S28** Reversed-phase HPLC-ESI MS traces at 260 nm for the photolysis reaction of **8** in a 1:1 (v/v) mixture of PBS buffer and ACN in the presence of DMAP (internal standard) at  $t=0$  (top) and after irradiation with red LED light (620 nm) for 15 min (middle) and 56 min (bottom) at 37 °C

## 5.- Confocal microscopy studies

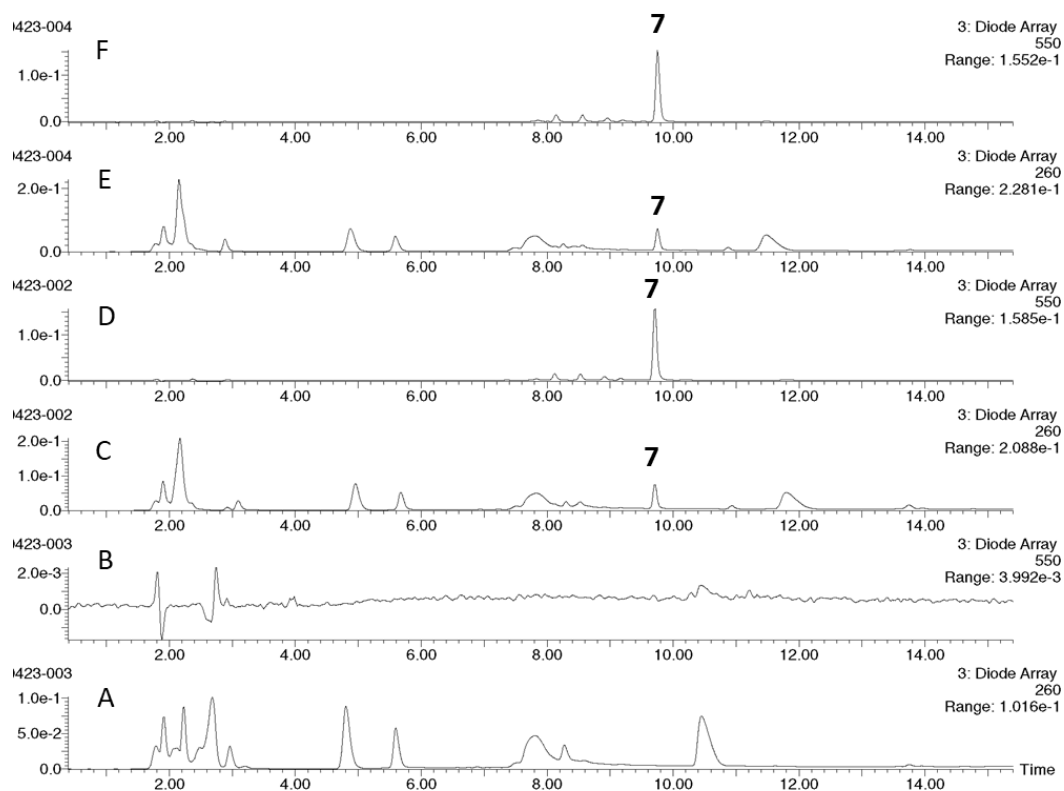

**Figure S29.** Dark stability of COUPY photocage **7** in Dullbecco Modified Eagle Medium (DMEM) containing high glucose and supplemented with 10% fetal bovine serum (FBS) and 50 U/mL penicillin-streptomycin. Reversed-phase HPLC-ESI MS traces of cell culture medium at 260 nm (A) and at 550 nm (B), and of a solution of compound **7** in cell culture medium at  $t = 0$  (C: 260 nm and D: 550 nm) and after standing for 1 h in the dark at 37 °C (E: 260 nm and F: 550 nm).

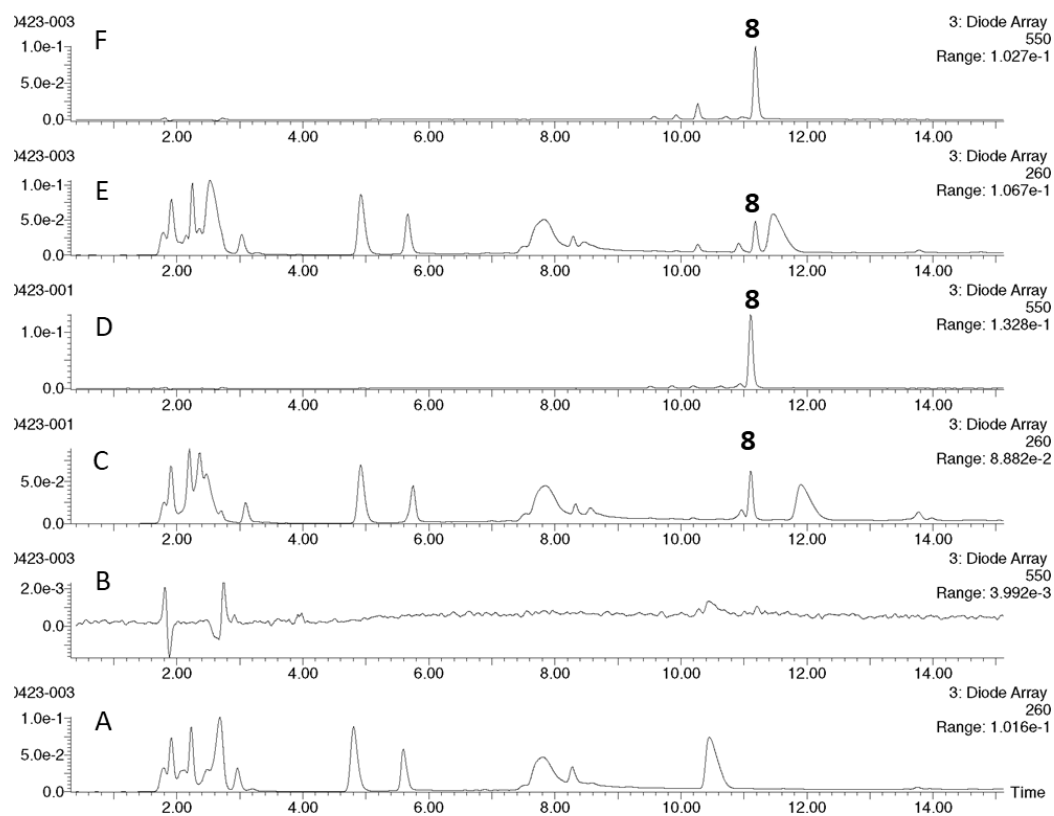

**Figure S30** Dark stability of COUPY photocage **8** in Dulbecco Modified Eagle Medium (DMEM) containing high glucose and supplemented with 10% fetal bovine serum (FBS) and 50 U/mL penicillin-streptomycin. Reversed-phase HPLC-ESI MS traces of cell culture medium at 260 nm (A) and at 550 nm (B), and of a solution of compound **8** in cell culture medium at  $t = 0$  (C: 260 nm and D: 550 nm) and after standing for 1 h in the dark at 37 °C (E: 260 nm and F: 550 nm).

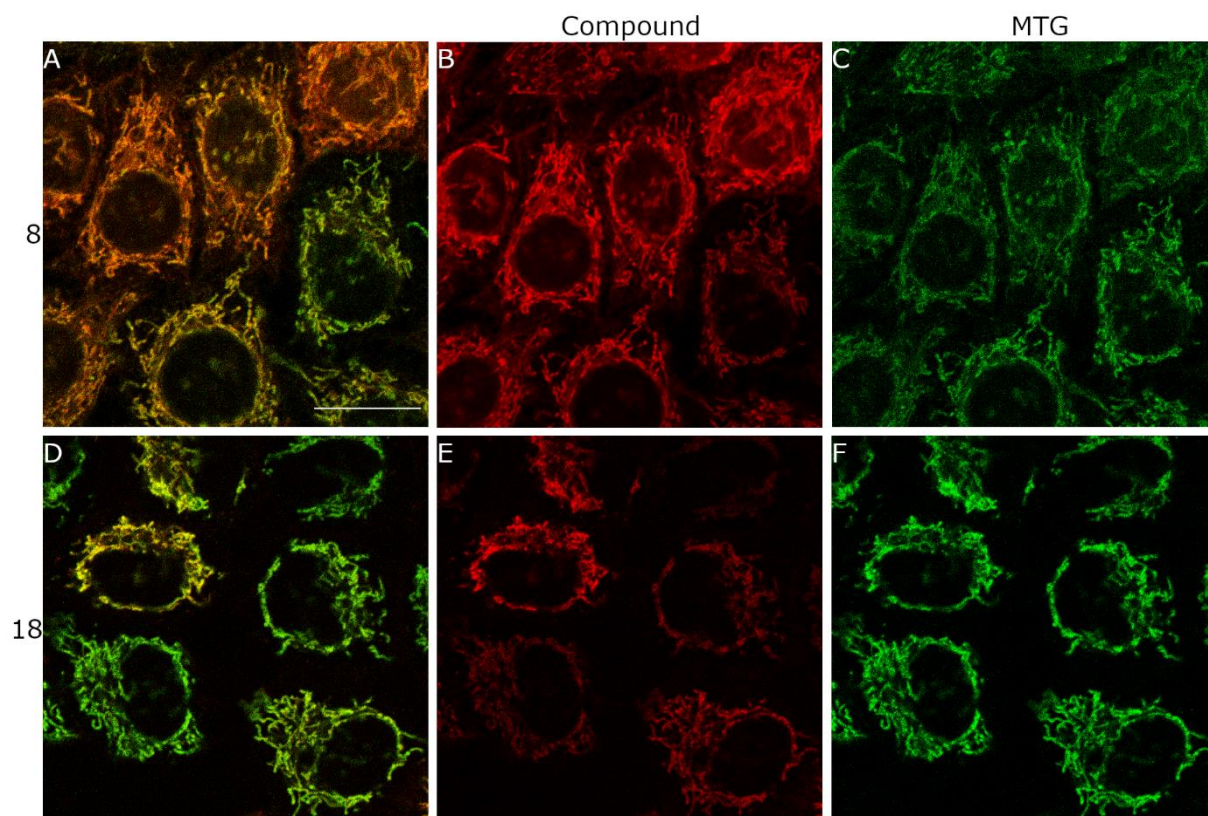

**Figure S31.** Co-localization studies with COUPY photocage **8** (top) and coumarin alcohol **18** (bottom) with Mitotracker Green FM. Single confocal planes of HeLa cells incubated with **8** or **18** (2  $\mu$ M, red) and MTG (0.1  $\mu$ M, green). A), D) Overlay of the two staining. B), E) compounds **8** and **18** signal, respectively. C), F) MTG signal. Scale bar: 20  $\mu$ m. All images are at the same scale as A.

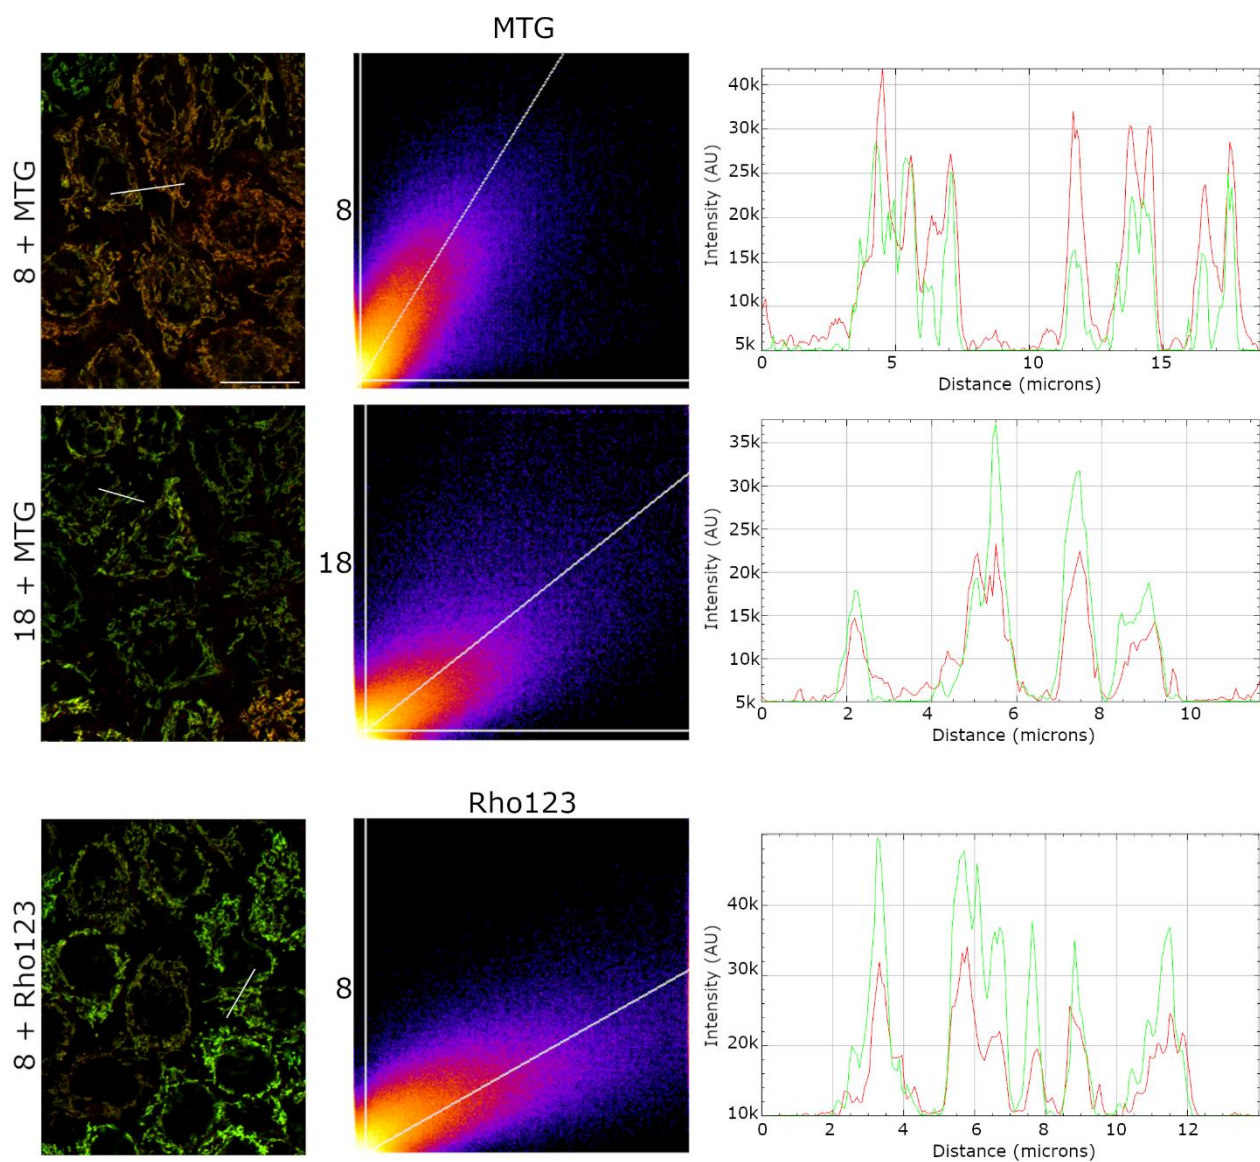

**Figure S32.** Visual inspection of co-localization experiments. Left column shows single confocal planes of HeLa cells with merged stainings of COUPY photocage **8** (2 mM, red) and MTG (0.1 mM, green, top row), coumarin alcohol **18** (2 mM, red) with MTG (0.1 mM, green, central row) and COUPY photocage **8** (2 mM, red) with Rho123 (26 mM, green, bottom row). Scale bar: 20  $\mu$ m. Central column shows the scatterplots of fluorescence signals of left column images. Right column shows the plot profiles of fluorescence intensities along the lines drawn on left column images.



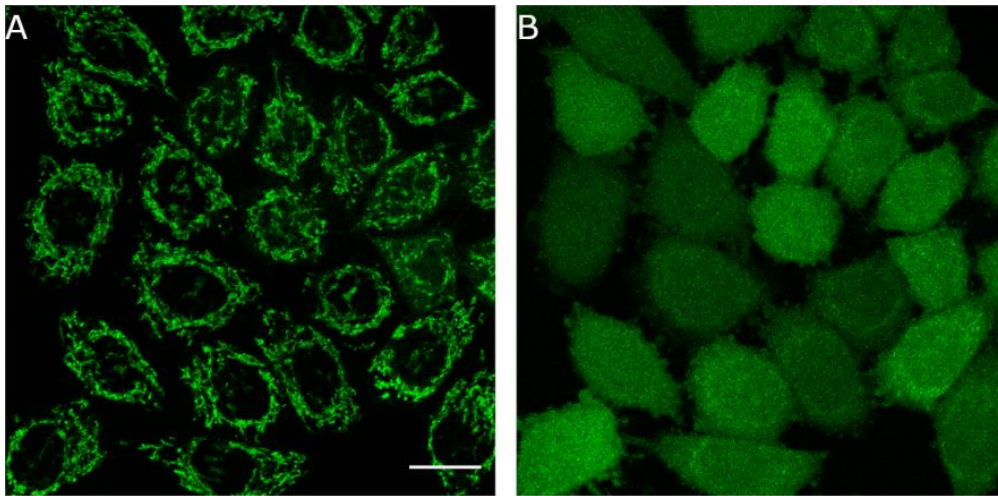

**Figure S33.** Single confocal planes of HeLa cells incubated with Rho123 (26  $\mu\text{M}$ , 15 min) before (A) and after addition (B) of DNP (200  $\mu\text{M}$ ). Scale bar: 20  $\mu\text{m}$ .

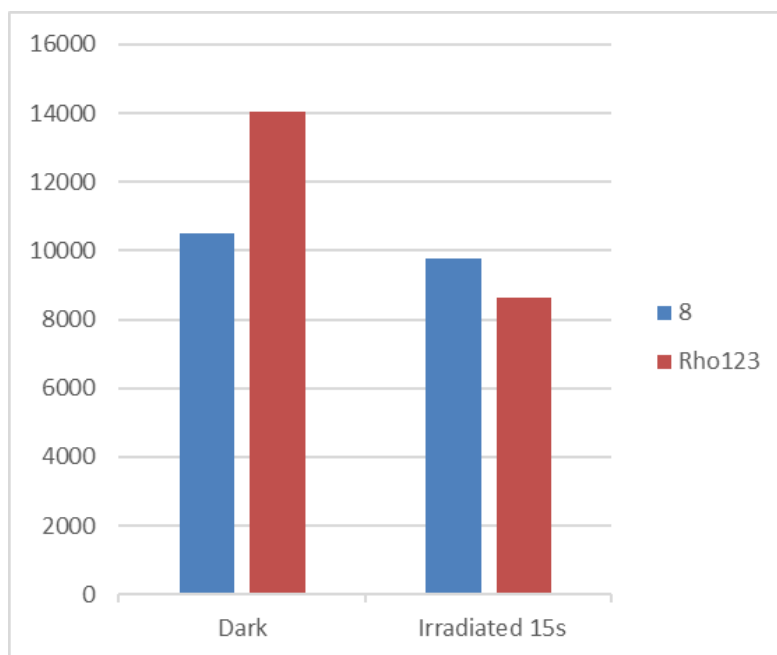

**Figure S34.** Mean intensity (Arbitrary Units) graph of COUPY photocage **8** and Rho123 at the mitochondria before and after irradiation with yellow light (BP 545/25 filter, 1.4  $\text{mW}/\text{cm}^2$ , 15 s).

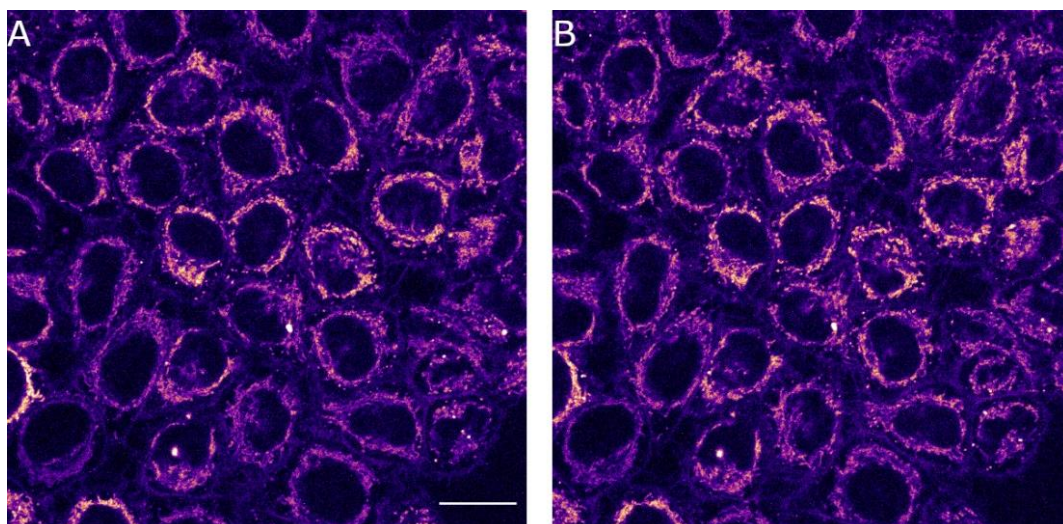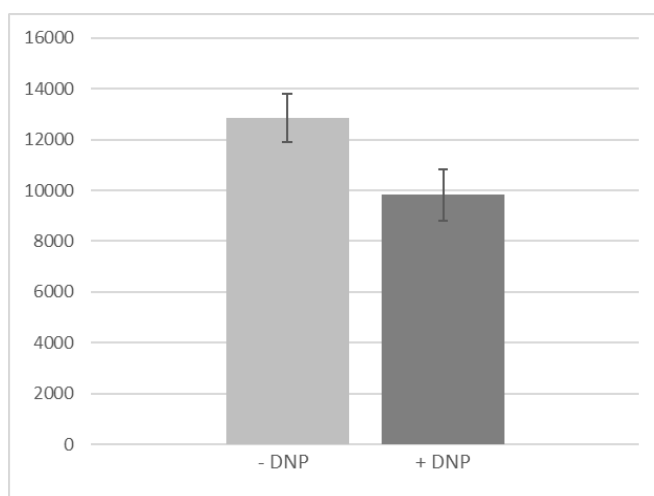

**Figure S35.** Top: Single confocal planes of HeLa cells incubated with coumarin **18** (2  $\mu$ M, 30 min) before (A) and after addition (B) of DNP (2  $\mu$ M). Scale bar: 20  $\mu$ m. Bottom: Mean intensity (Arbitrary Units) graph of coumarin **18** before and after addition of DNP (2.0  $\mu$ M, 37  $^{\circ}$ C, X min).

## 5.- $^1\text{H}$ , $^{13}\text{C}$ and $^{19}\text{F}$ NMR spectra and HR ESI-MS of the compounds

### Compound 12

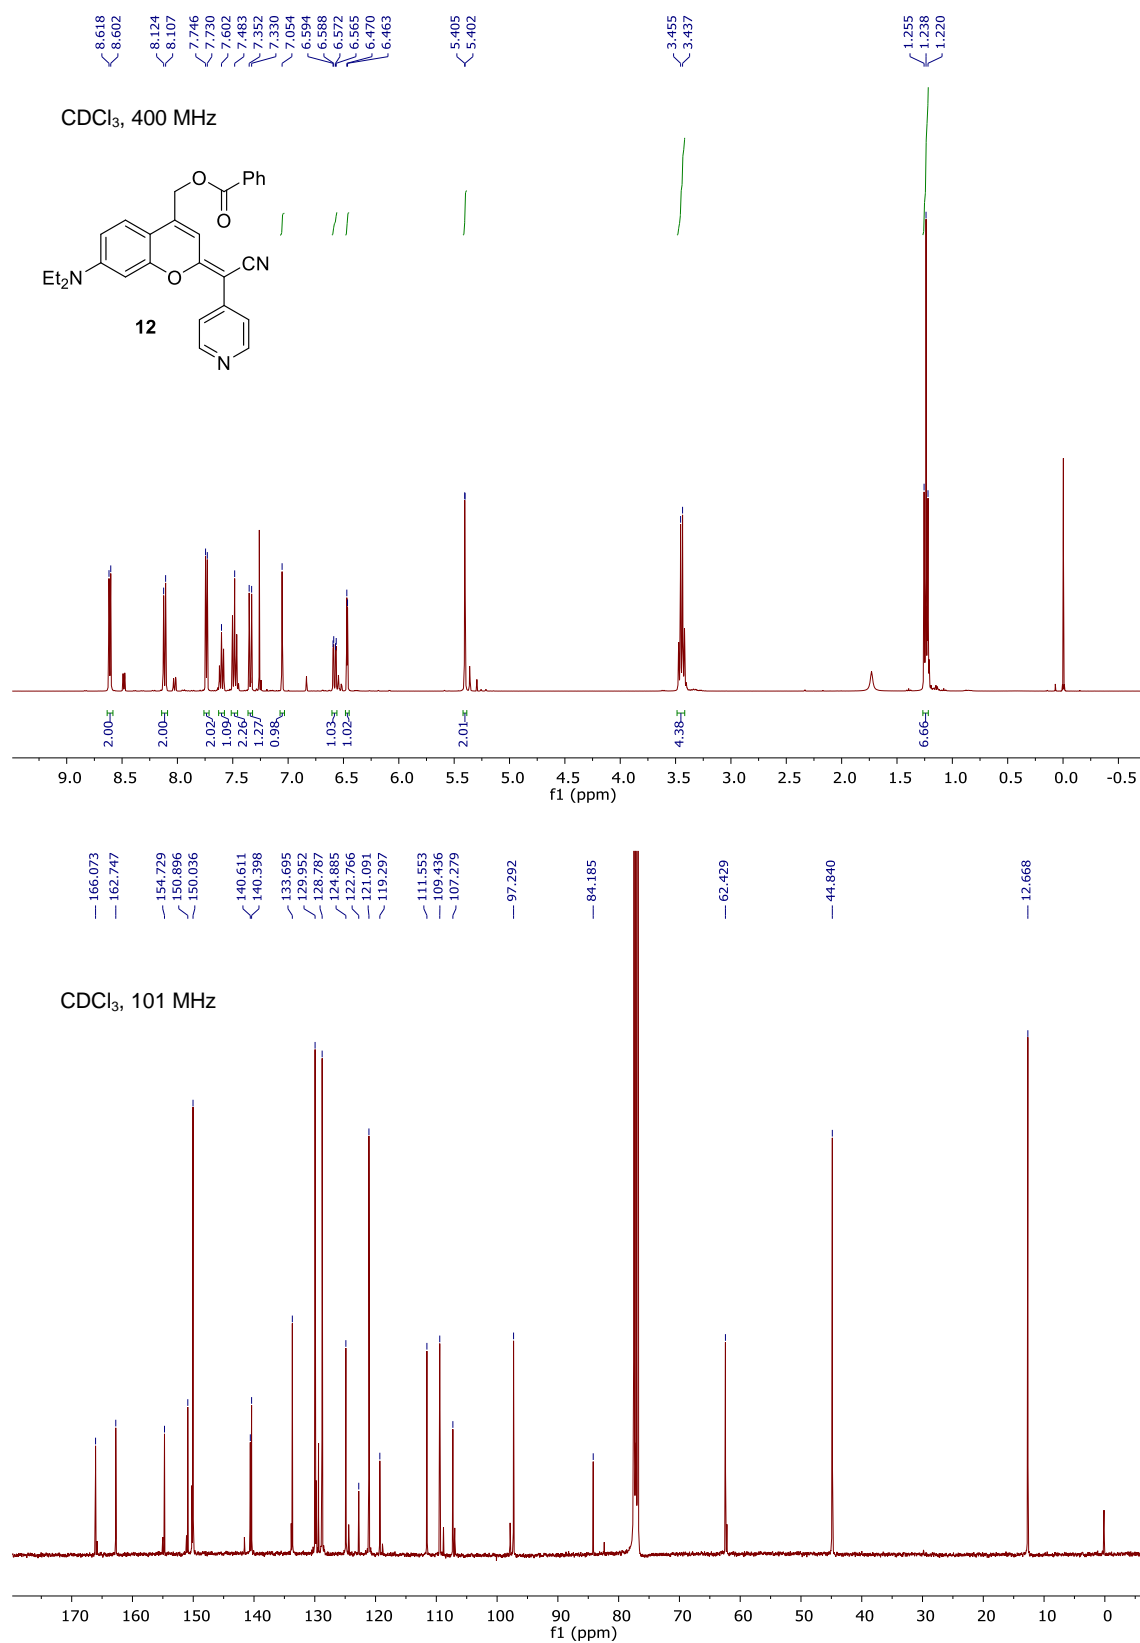

Figure S36.  $^1\text{H}$  and  $^{13}\text{C}$  NMR spectra of compound **12** in CDCl<sub>3</sub>.



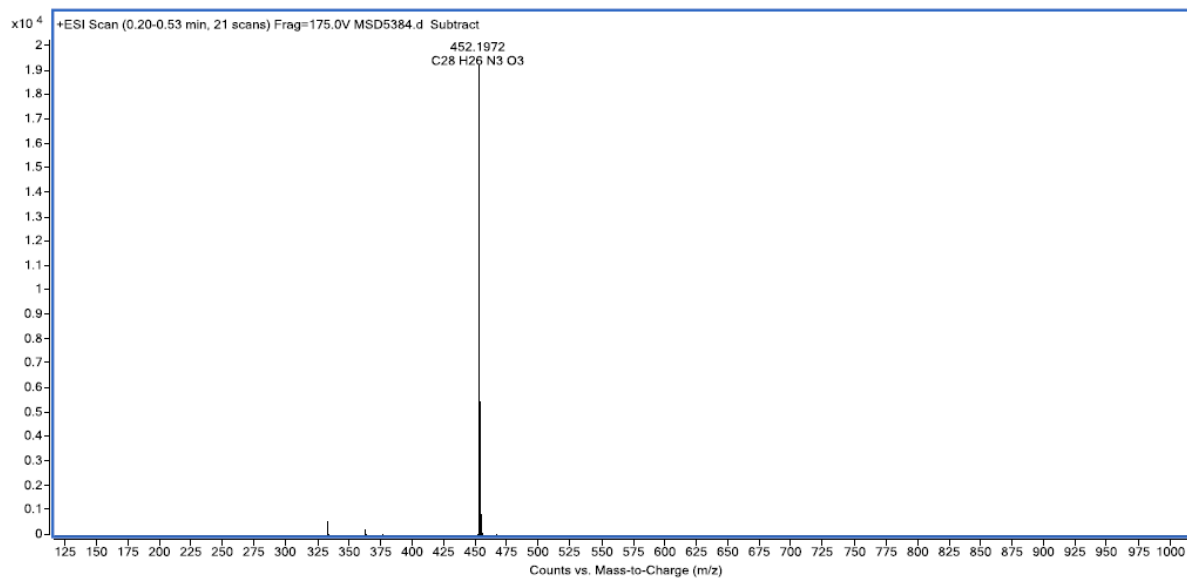

**Figure S37.** HR ESI-MS spectrum of compound **12**.

# Compound 13

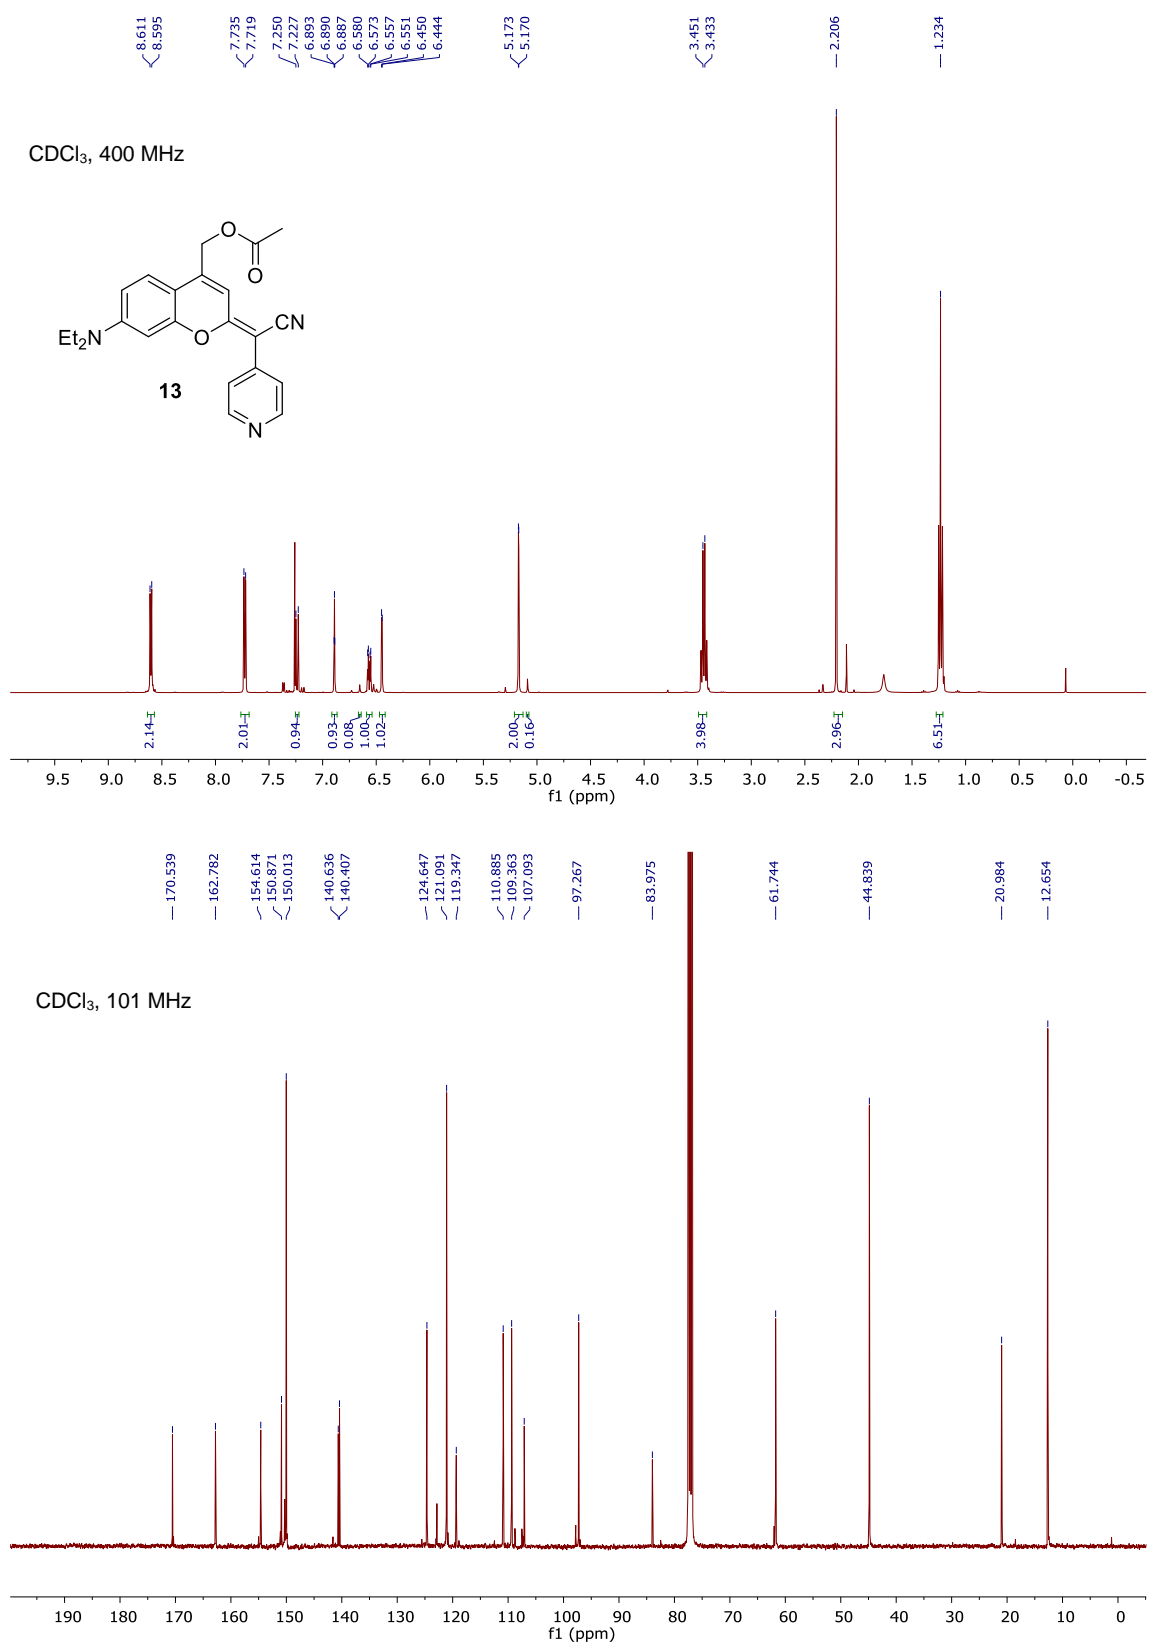

Figure S38. <sup>1</sup>H and <sup>13</sup>C NMR spectra of compound 13 in CDCl<sub>3</sub>.

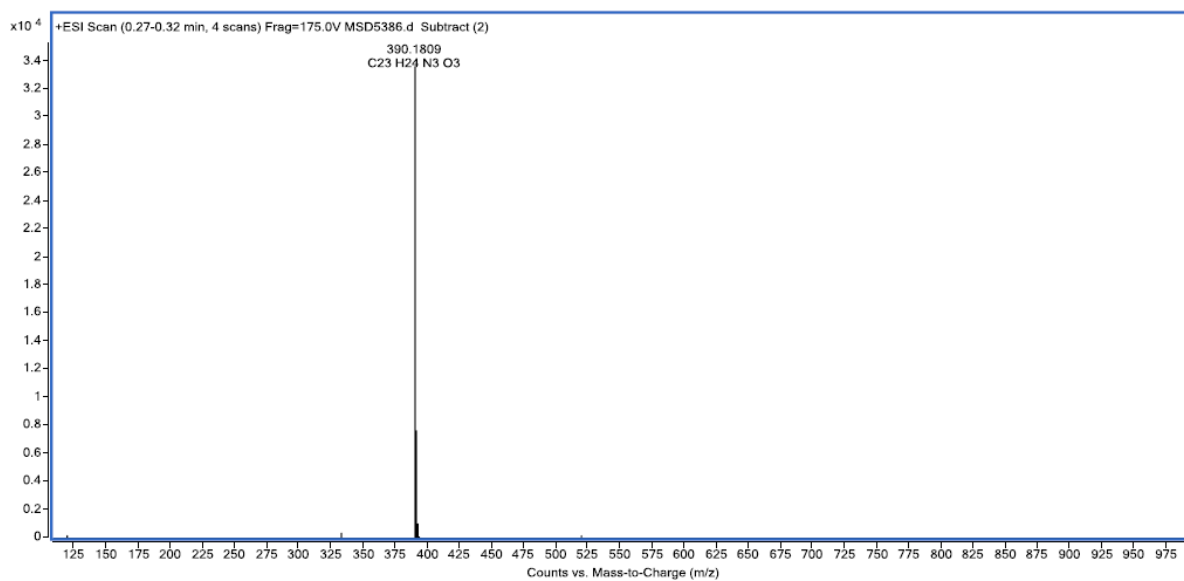

**Figure S39.** HR ESI-MS spectrum of compound **13**.

# Compound 14

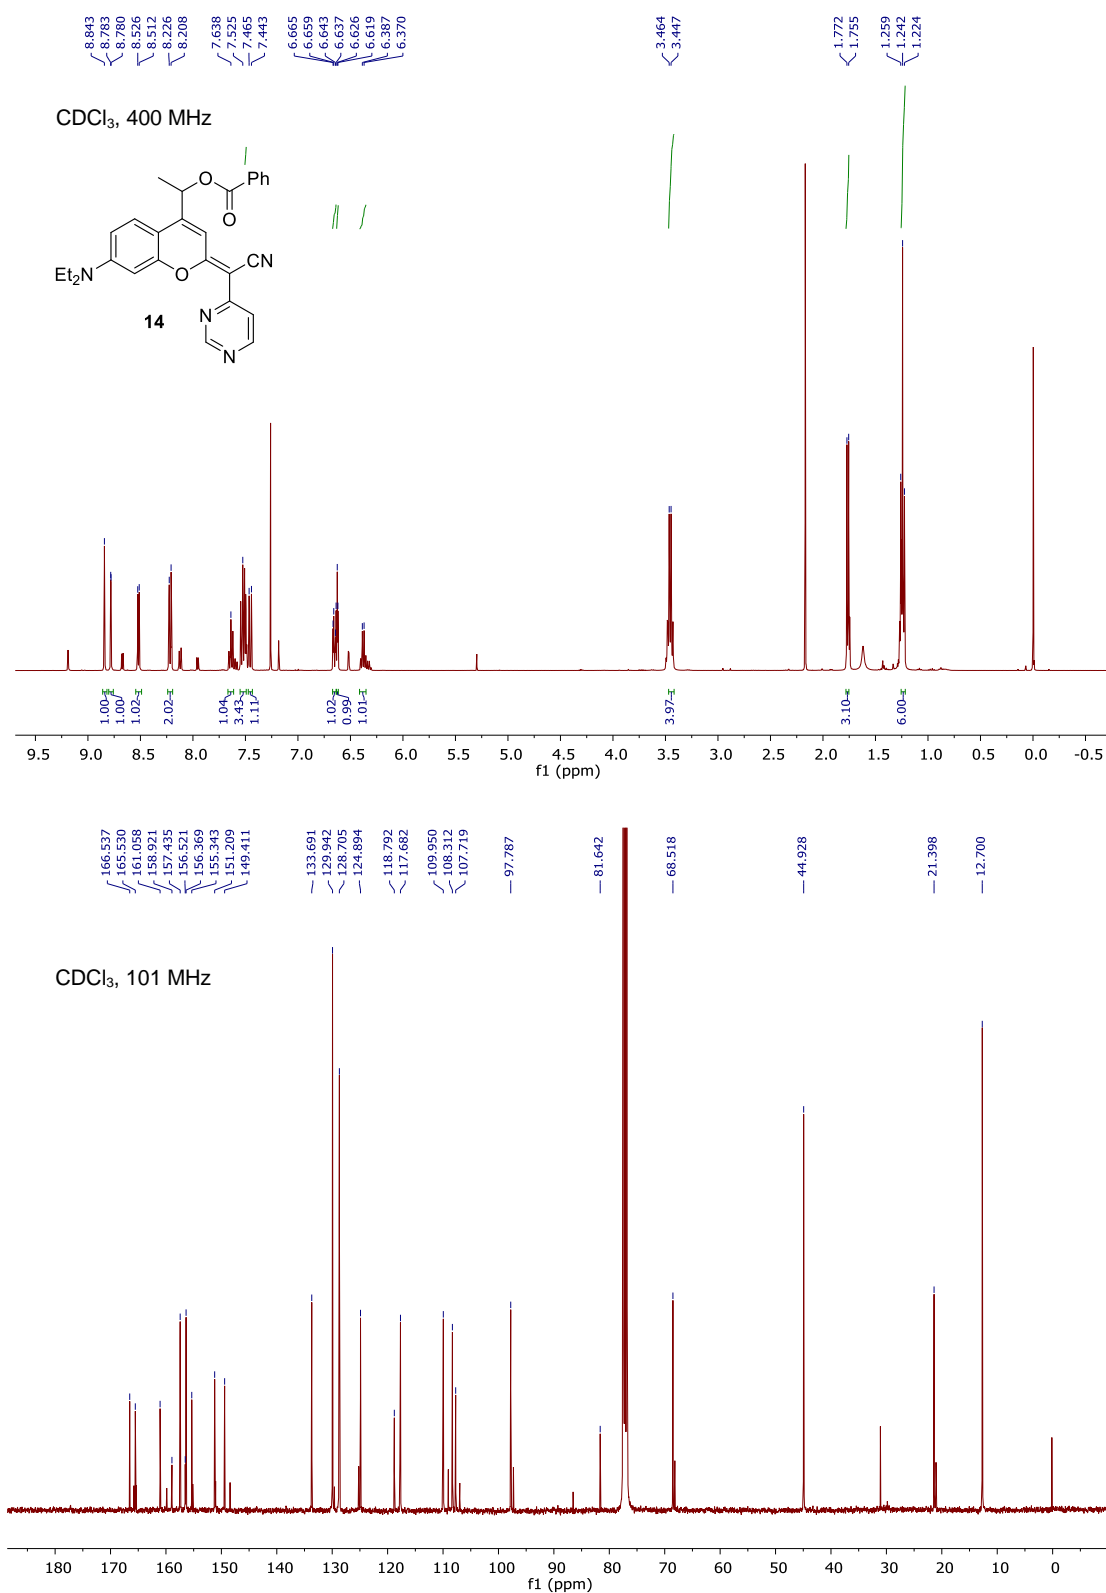

Figure S40. <sup>1</sup>H and <sup>13</sup>C NMR spectra of compound 14 in CDCl<sub>3</sub>.

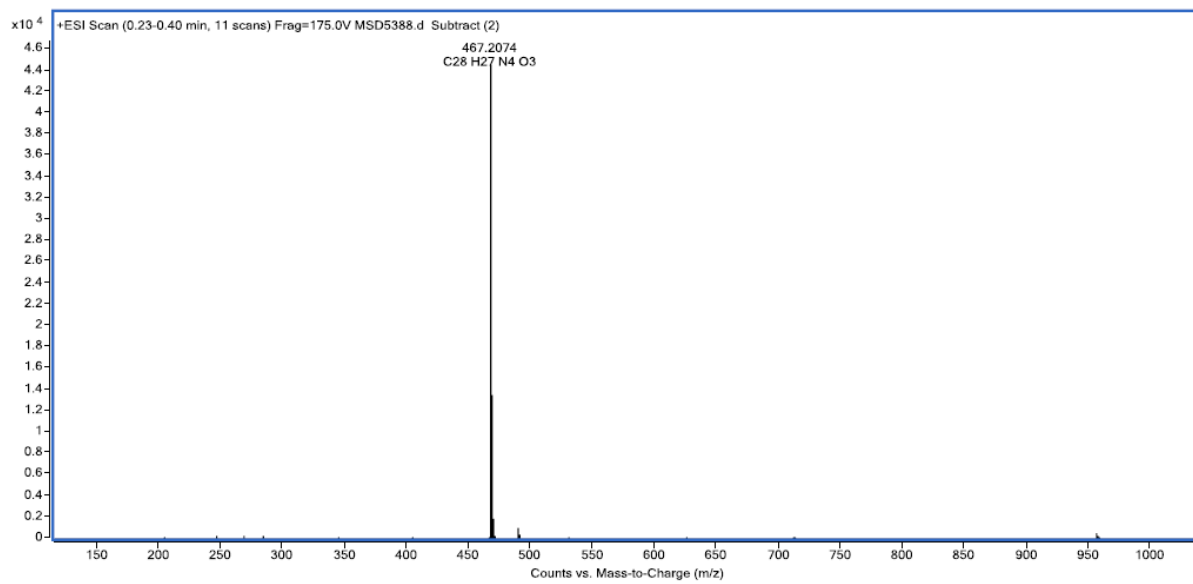

**Figure S41.** HR ESI-MS spectrum of compound **14**.

# Compound 15

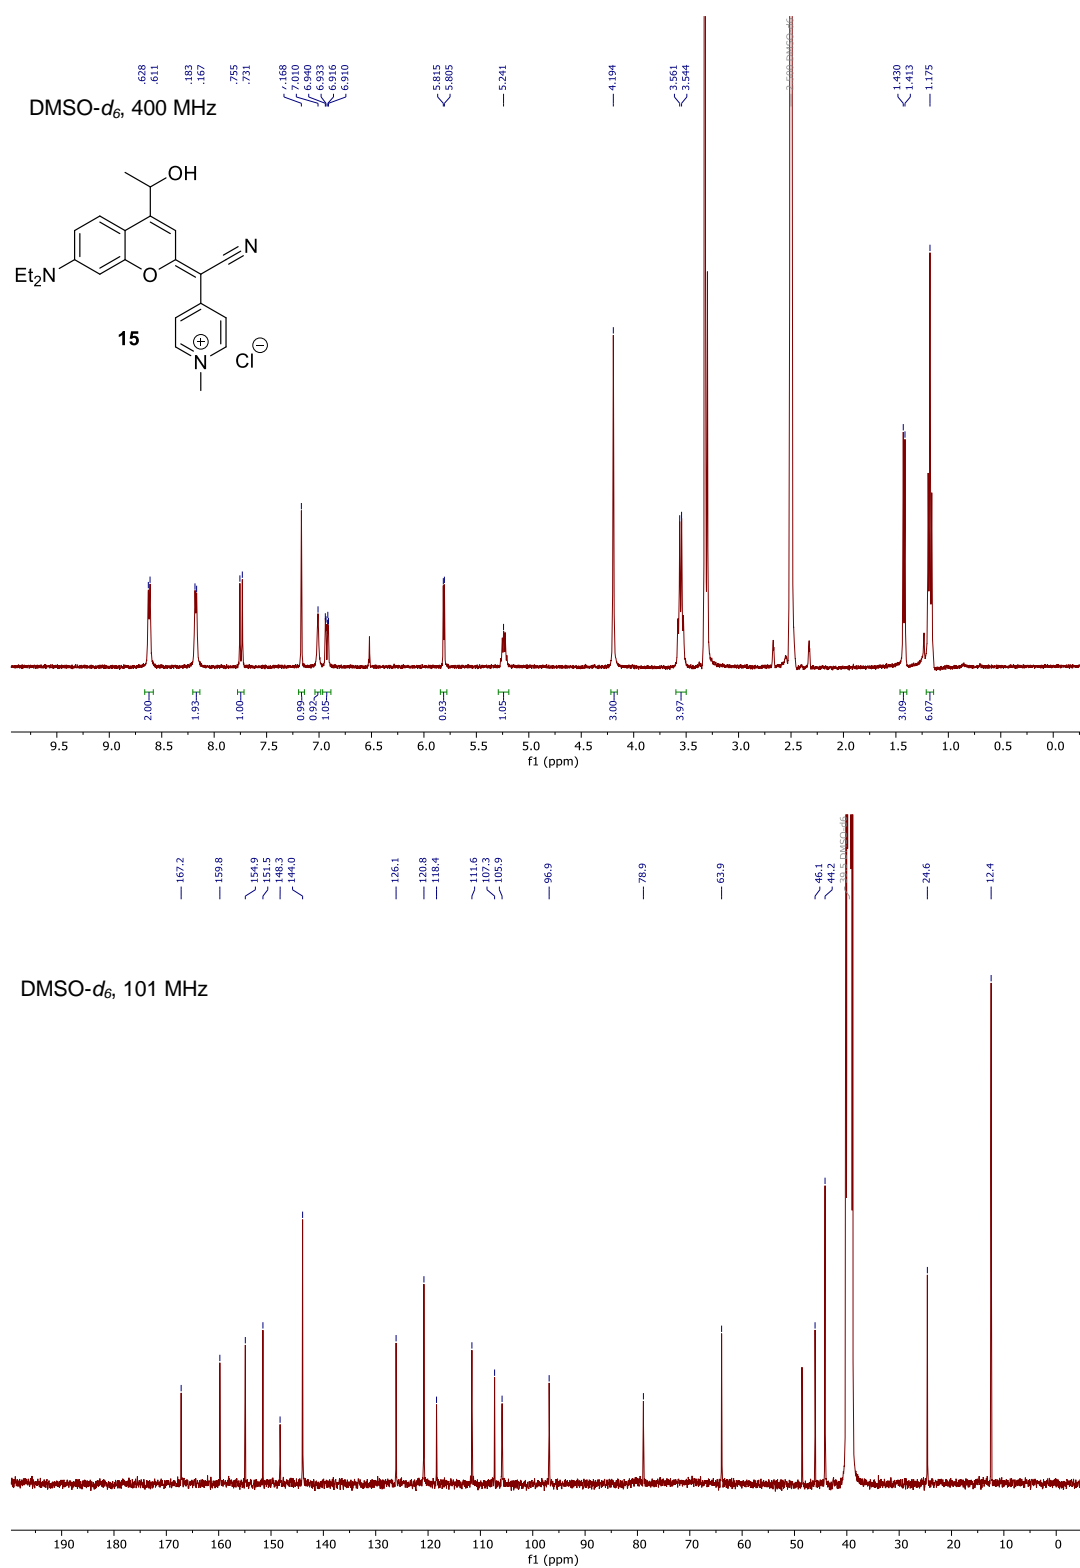

Figure S42.  $^1\text{H}$  and  $^{13}\text{C}$  NMR spectra of compound **15** in DMSO- $d_6$ .

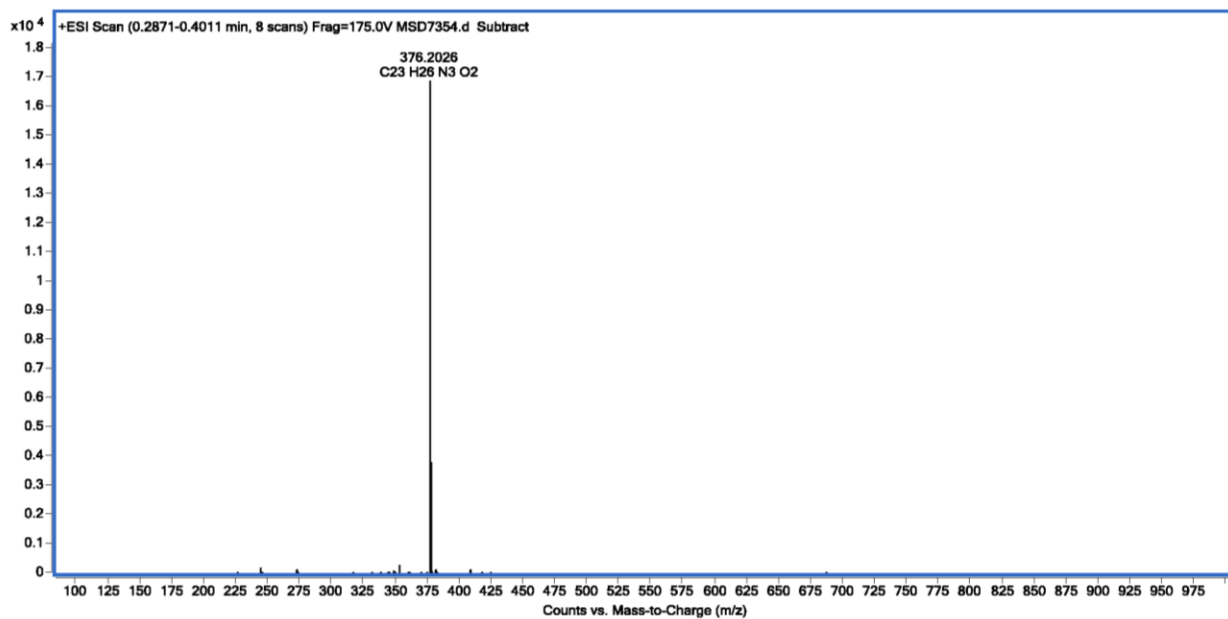

**Figure S43.** HR ESI-MS spectrum of compound **15**.

# Compound 16

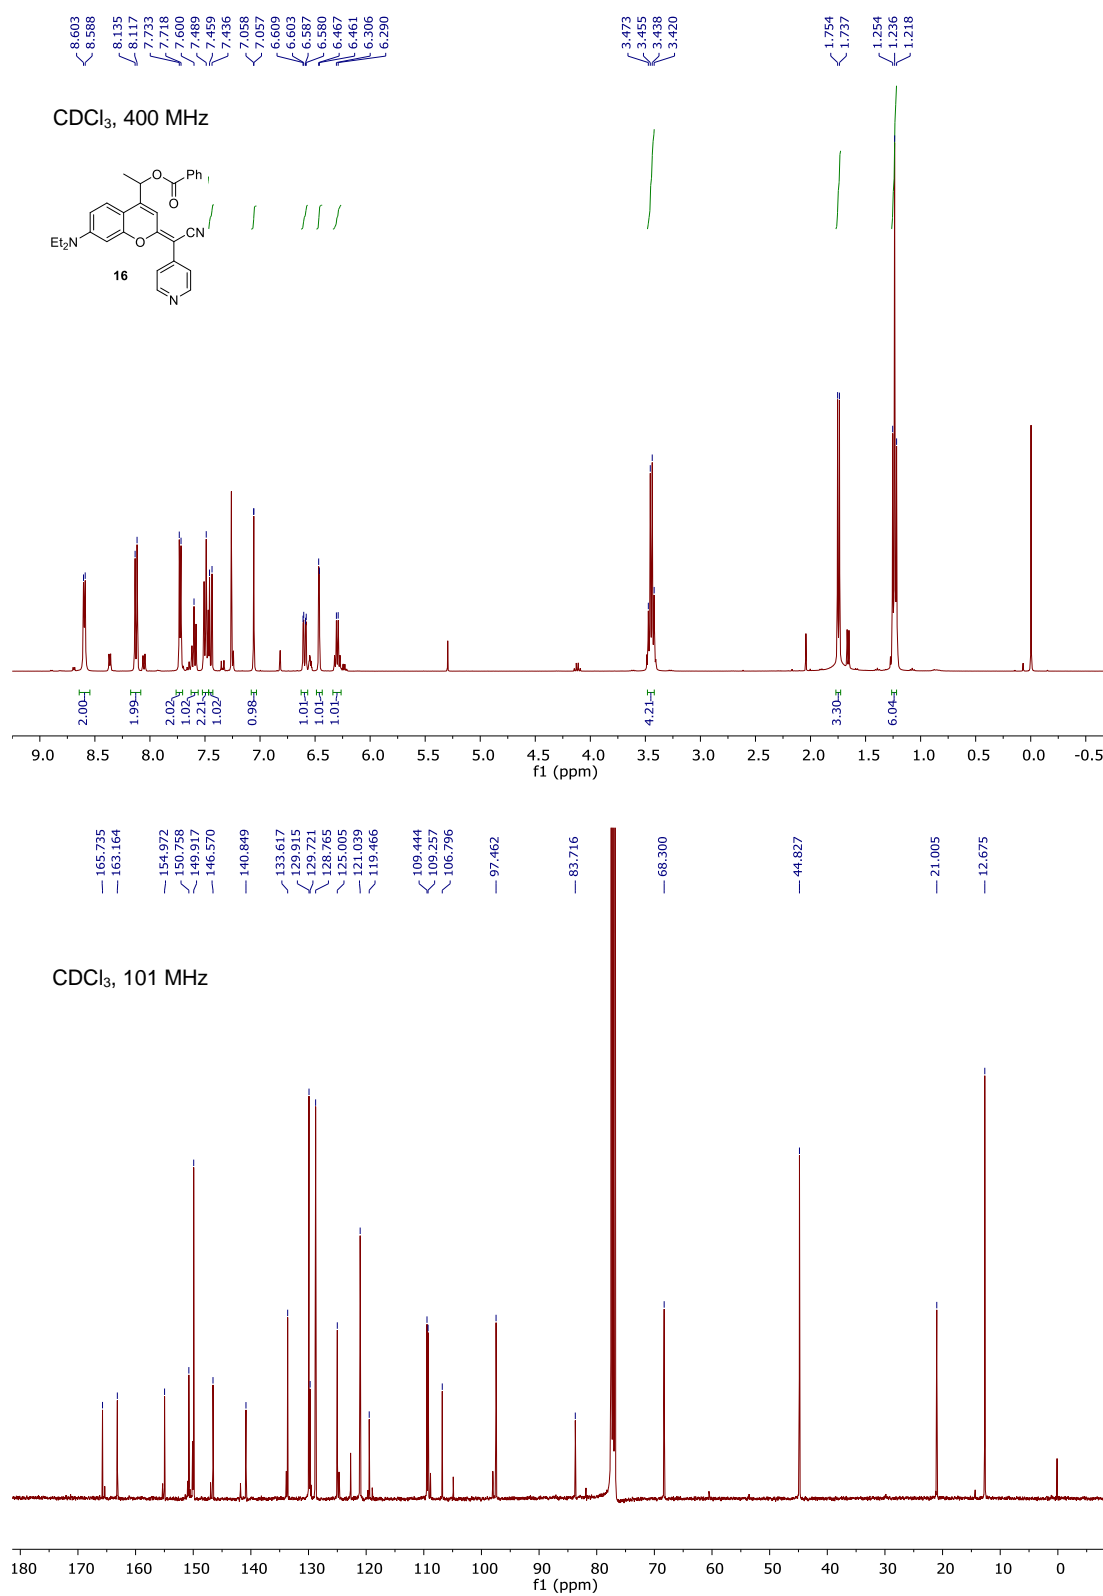

Figure S44.  $^1\text{H}$  and  $^{13}\text{C}$  NMR spectra of compound 16 in CDCl<sub>3</sub>.



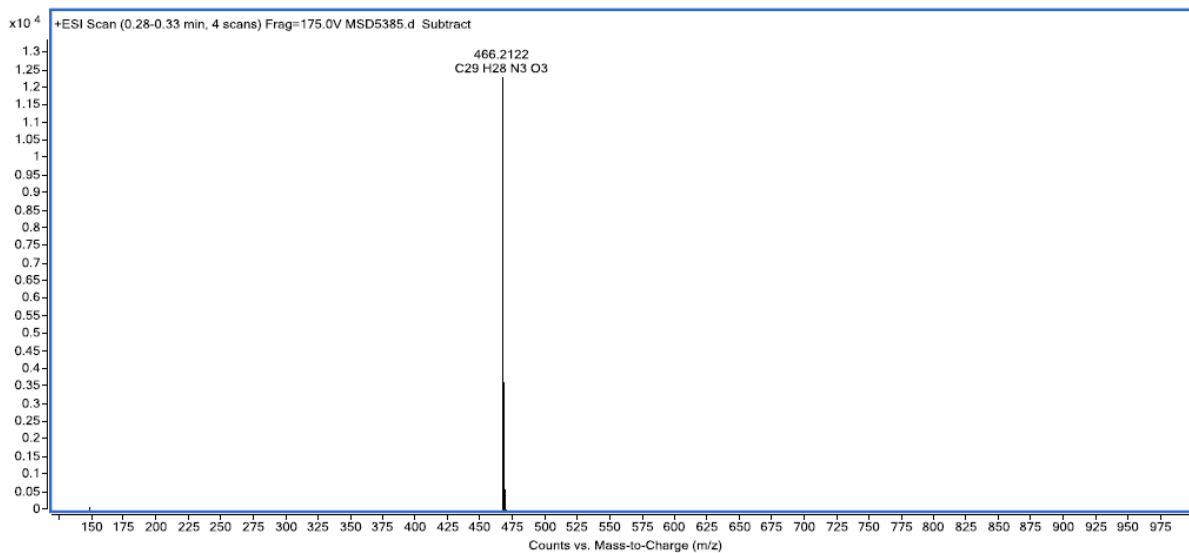

**Figure S45.** HR ESI-MS spectrum of compound **16**.

## Compound 17

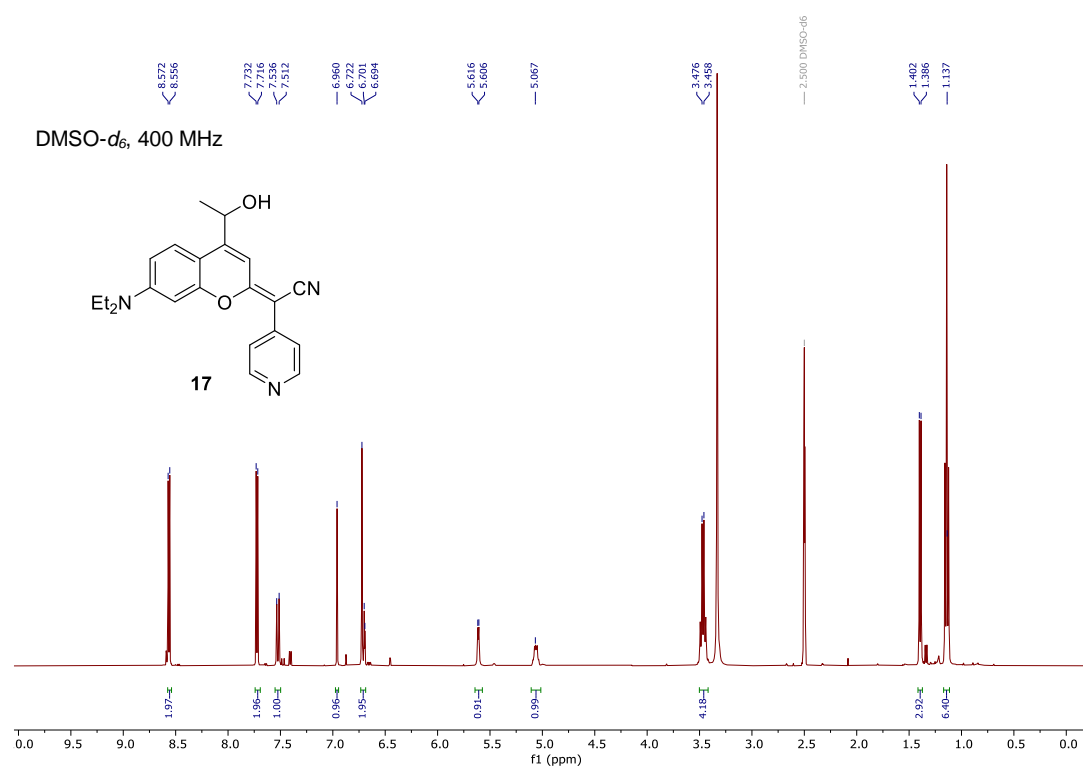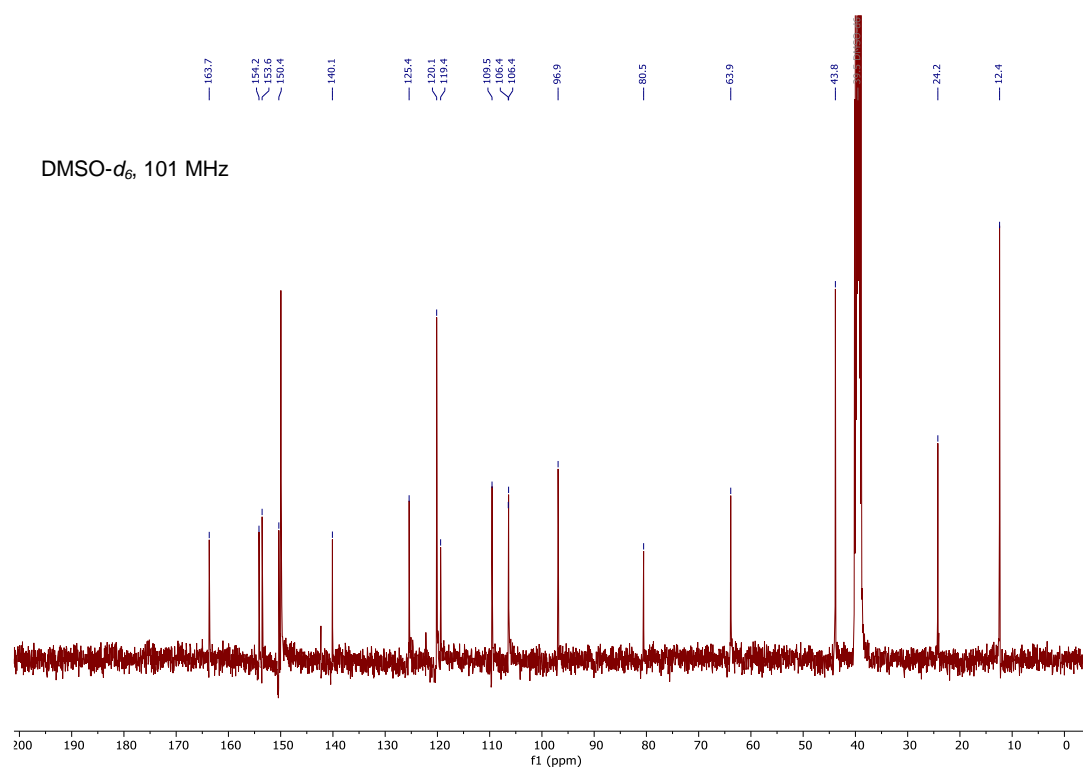

Figure S46. <sup>1</sup>H and <sup>13</sup>C NMR spectra of compound **36** in DMSO-*d*<sub>6</sub>.

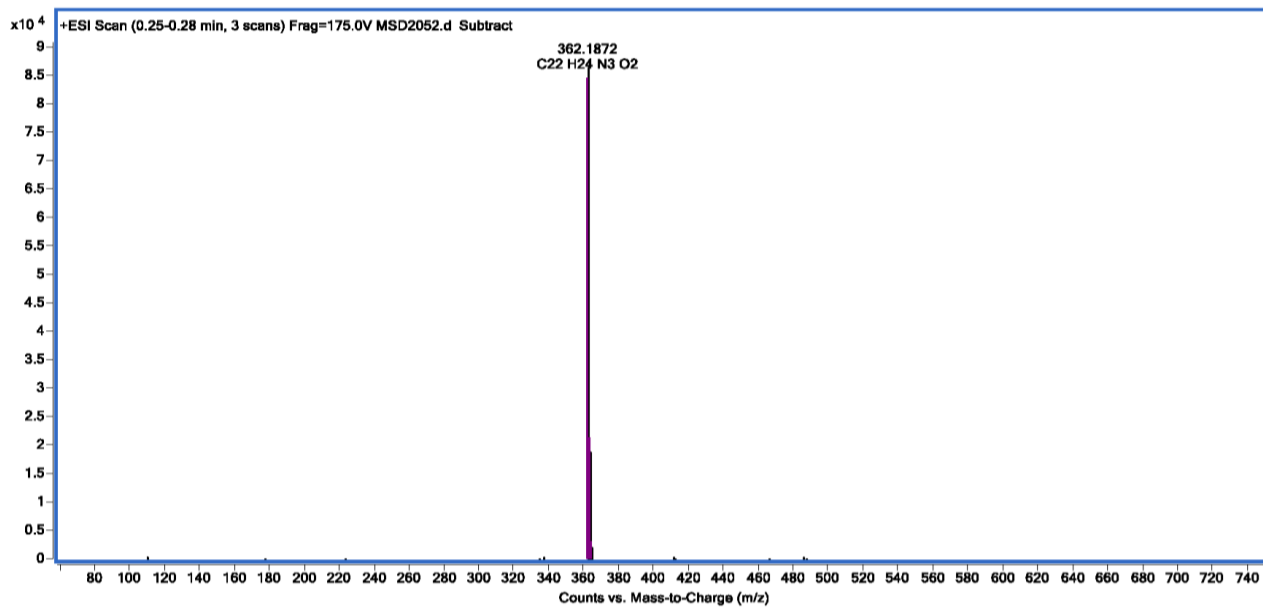

**Figure S47.** HR ESI-MS spectrum of compound **17**.

# Compound 18

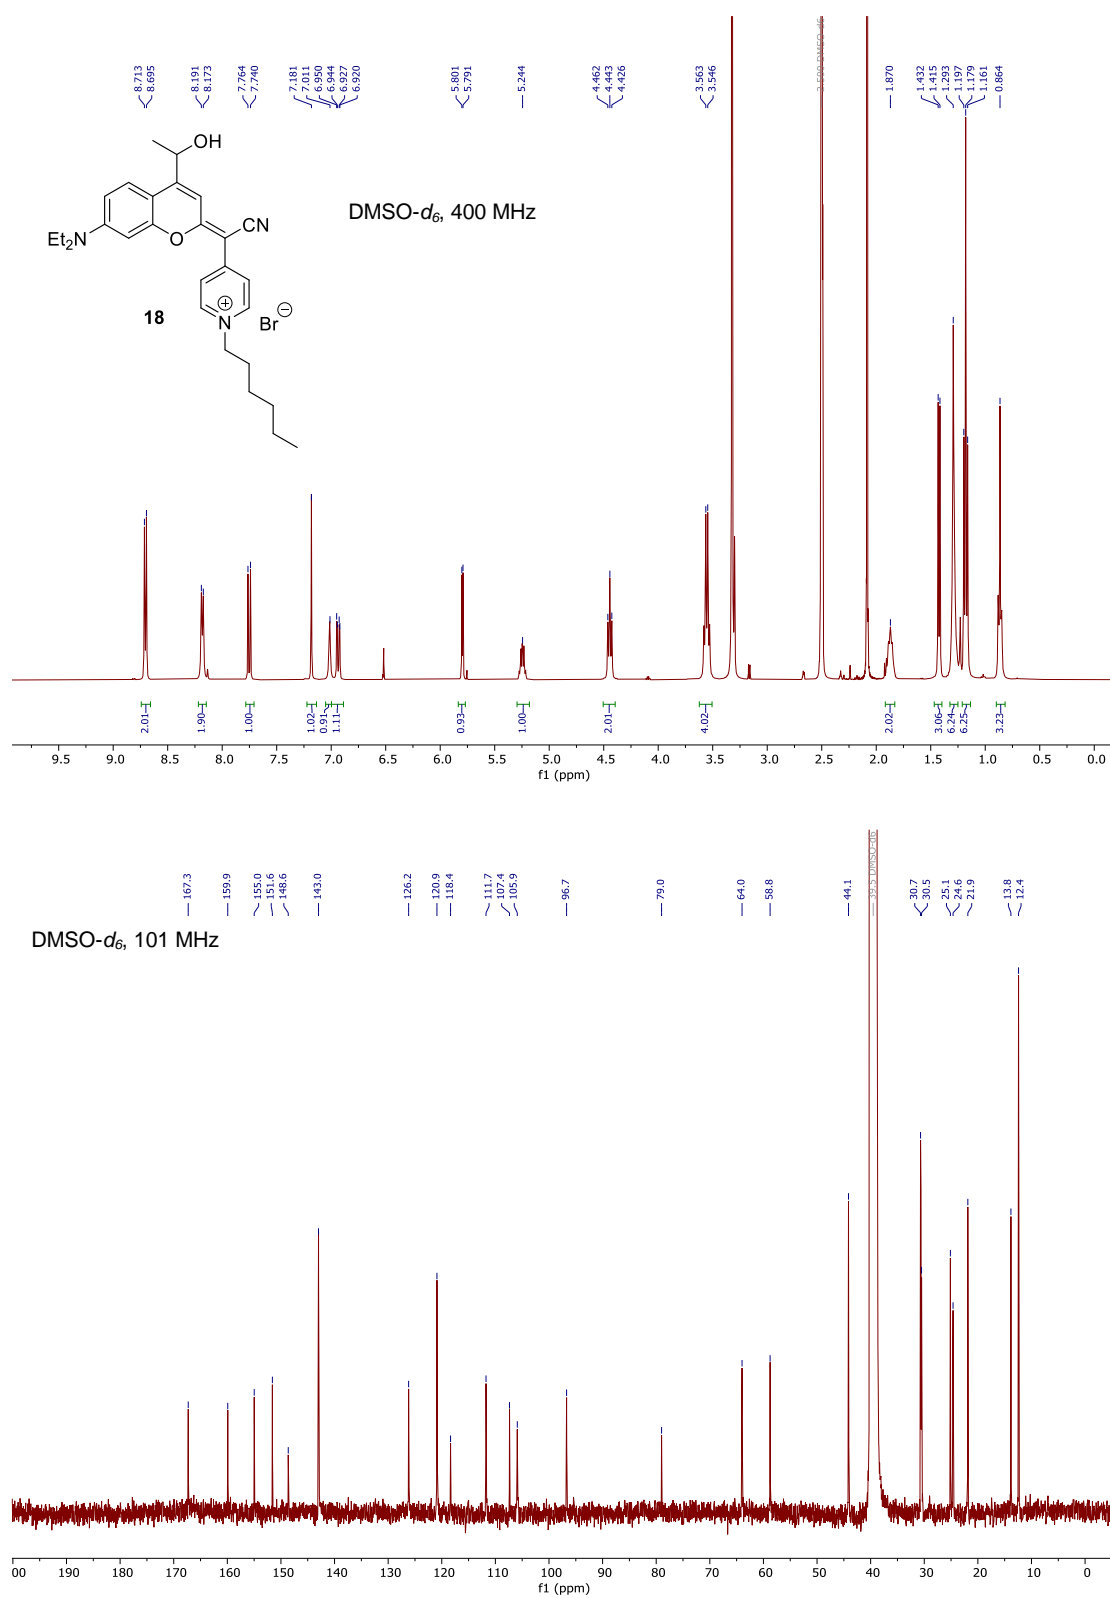

Figure S48. <sup>1</sup>H and <sup>13</sup>C NMR spectra of compound 18 in DMSO-*d*<sub>6</sub>.

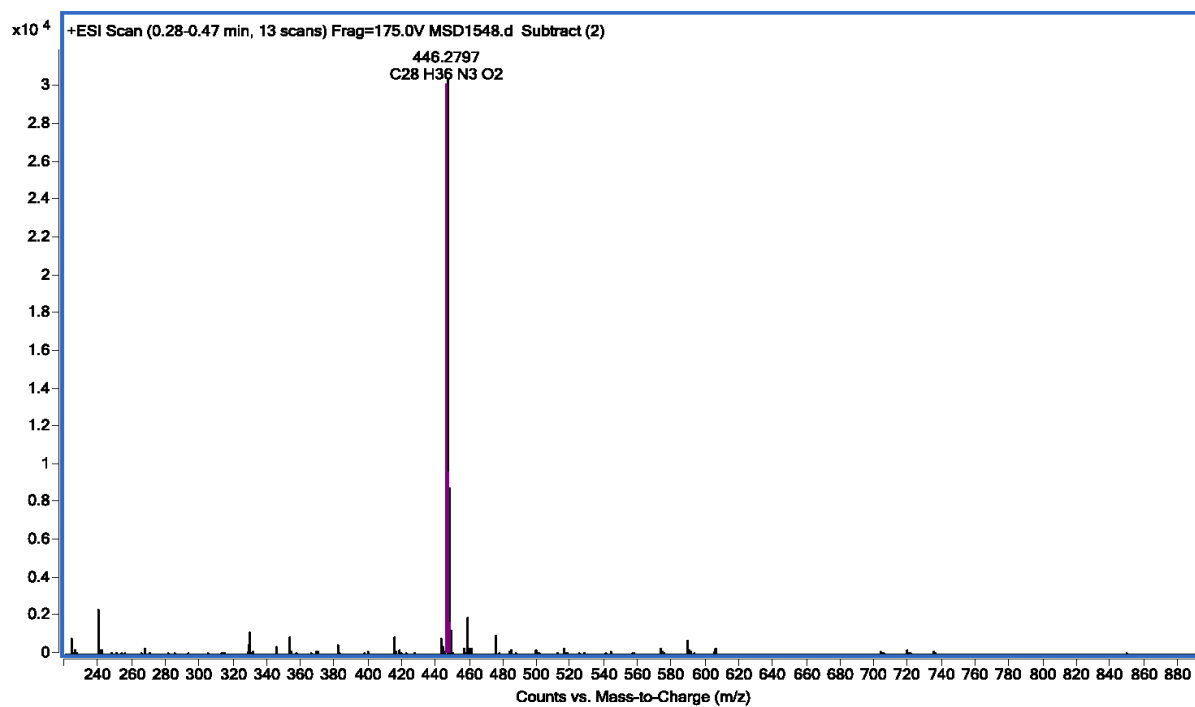

**Figure S49.** HR ESI-MS spectrum of compound **18**.

# Compound 3

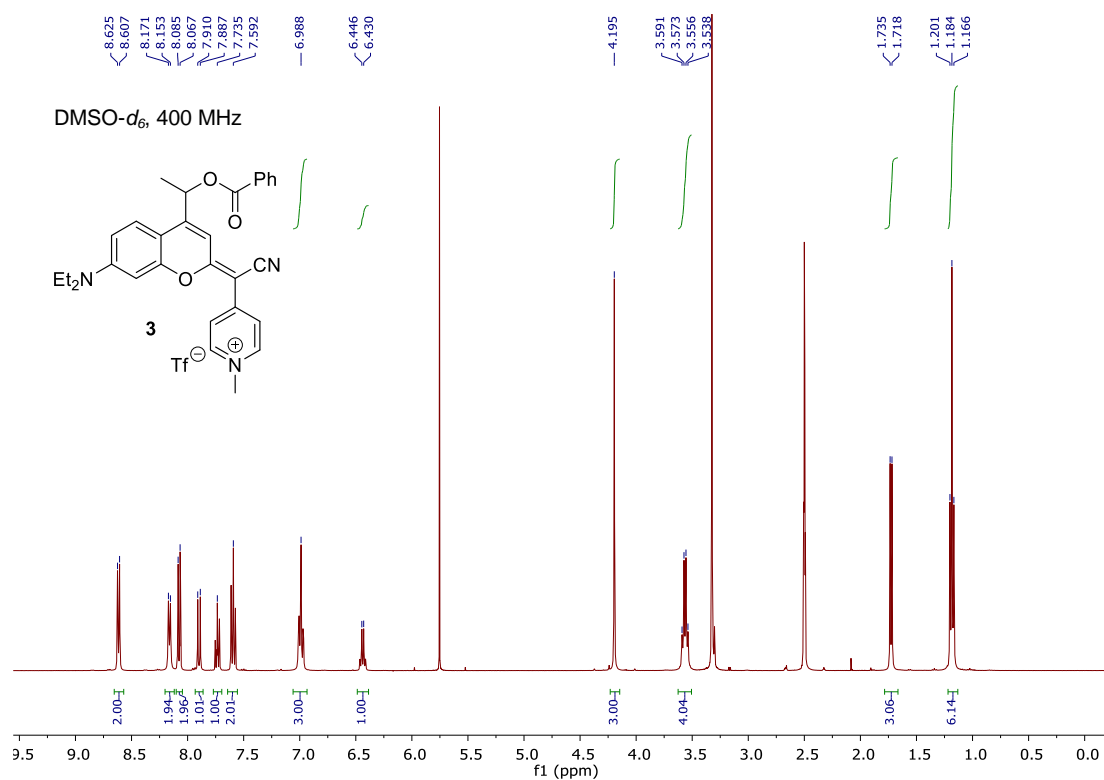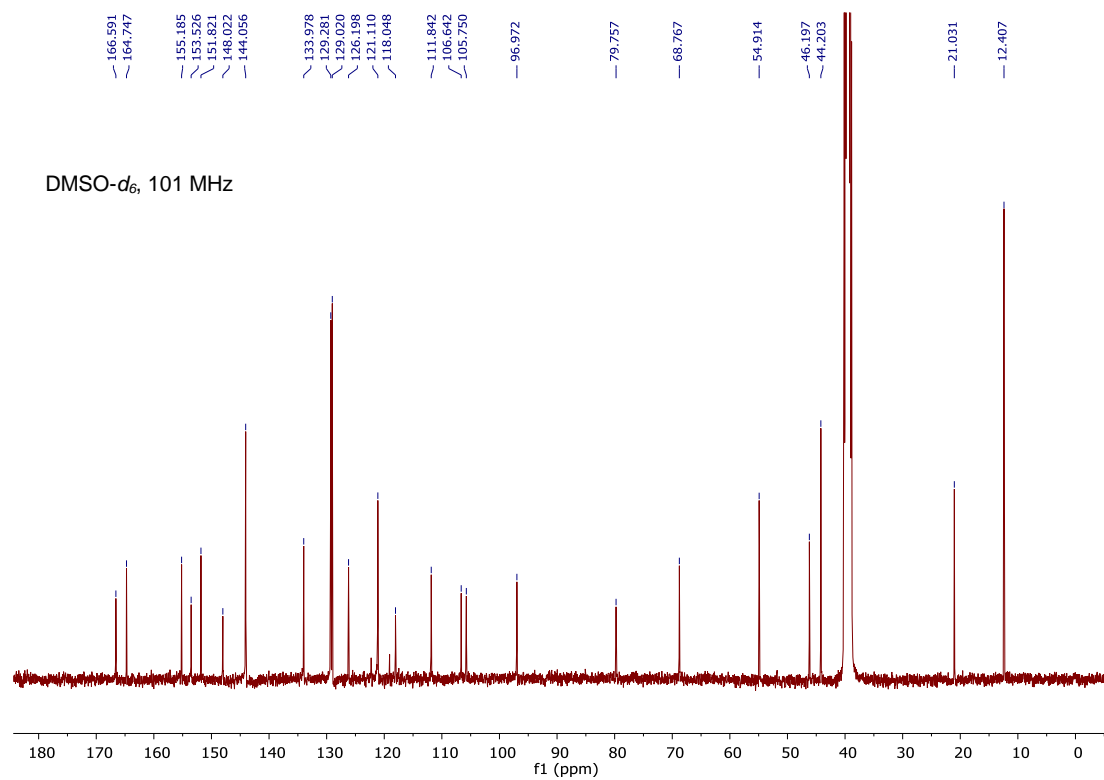

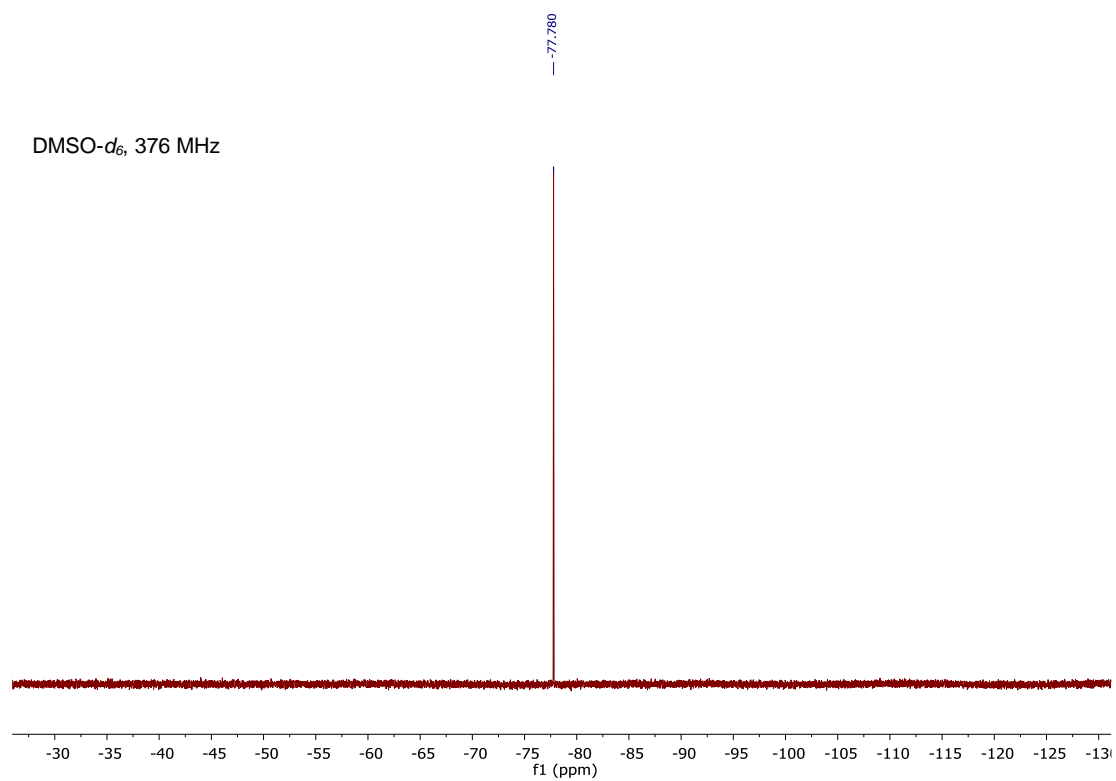

**Figure S50.**  $^1\text{H}$ ,  $^{13}\text{C}$  and  $^{19}\text{F}$  NMR spectra of compound **3** in DMSO- $d_6$ .

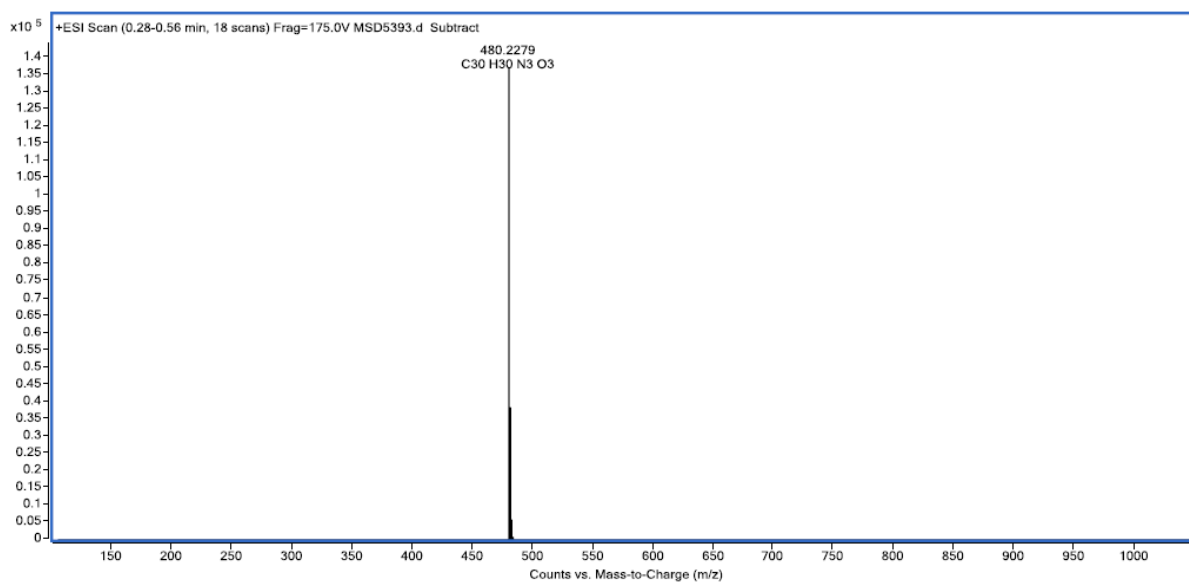

**Figure S51.** HR ESI-MS spectrum of compound **3**.

# Compound 4

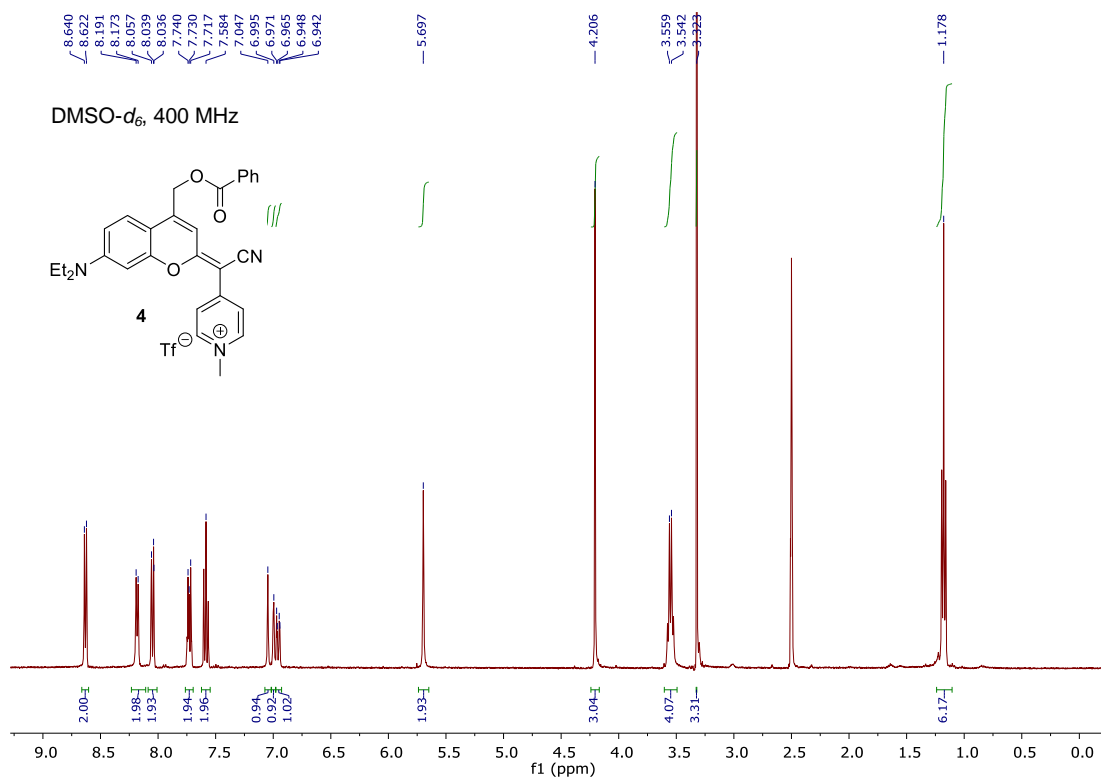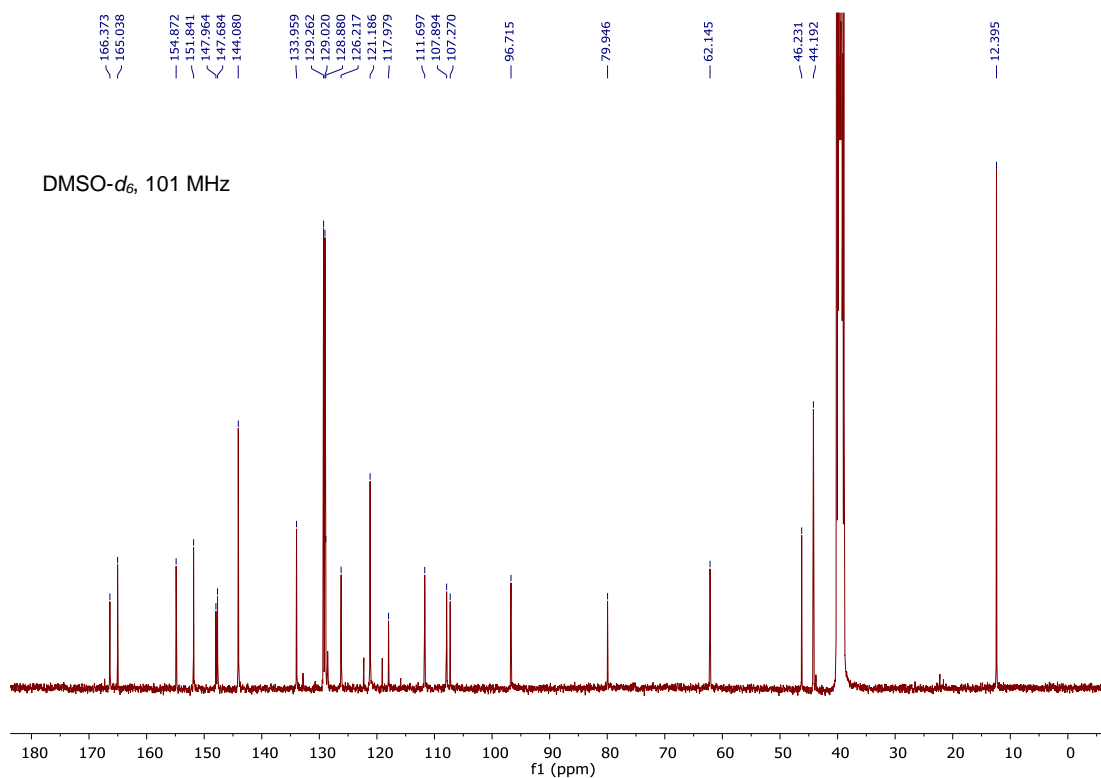



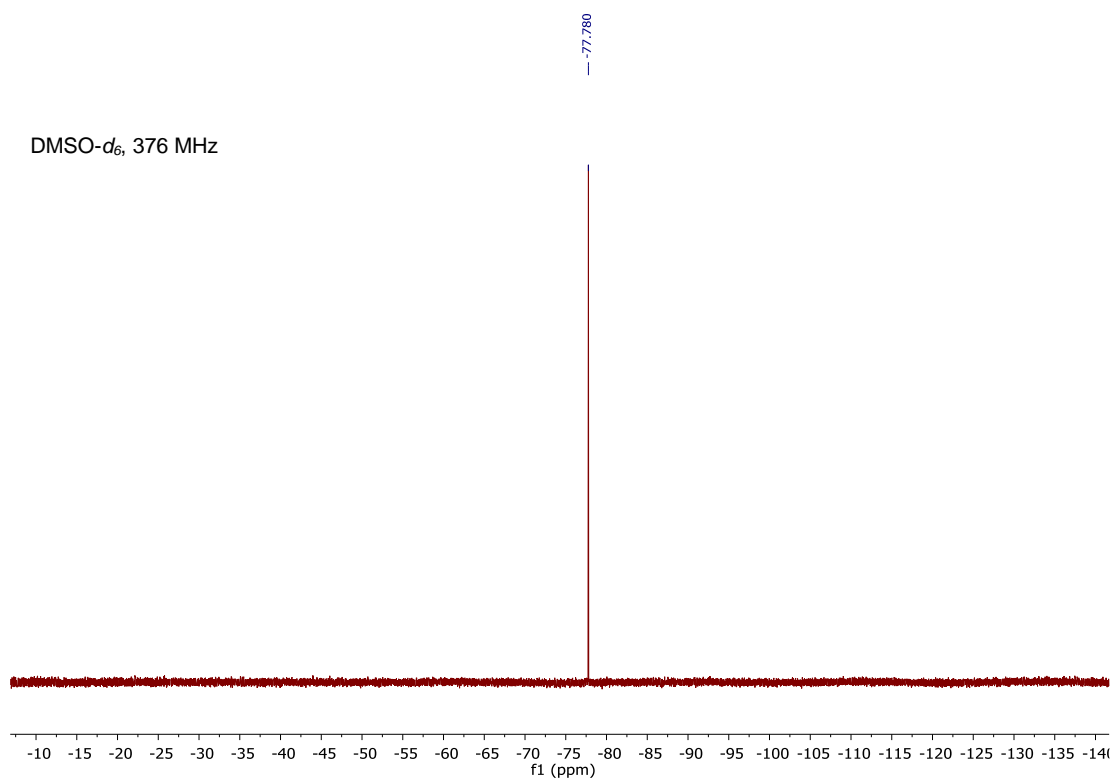

**Figure S52.** <sup>1</sup>H, <sup>13</sup>C and <sup>19</sup>F NMR spectra of compound **4** in DMSO-*d*<sub>6</sub>.

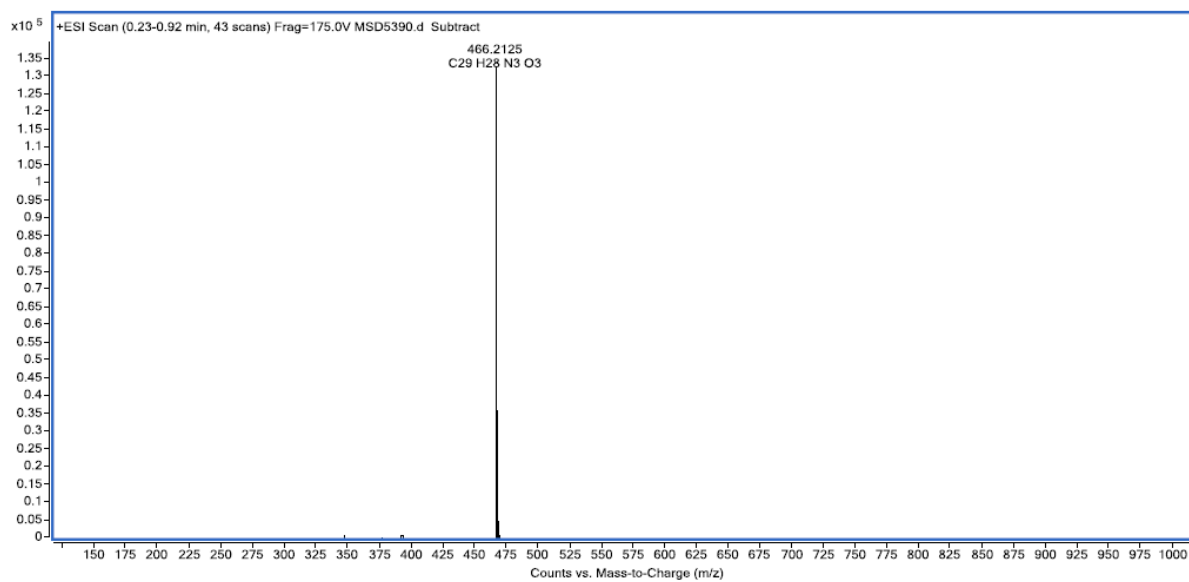

**Figure S53.** HR ESI-MS spectrum of compound **4**

# Compound 5

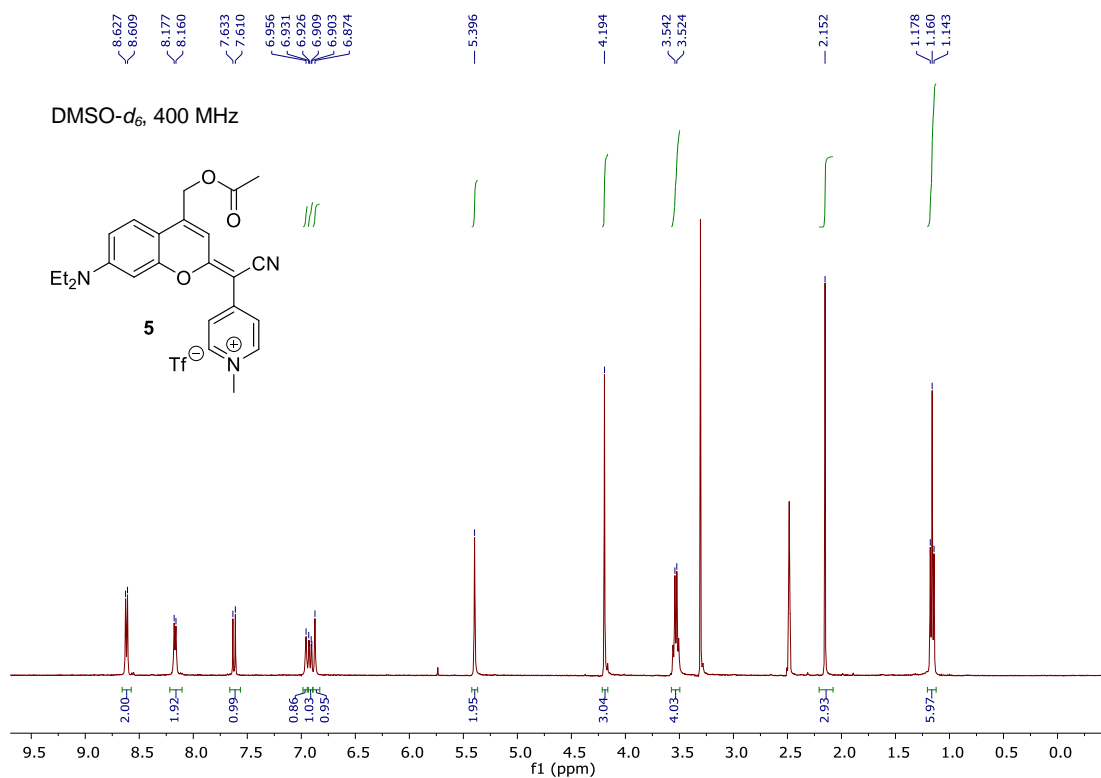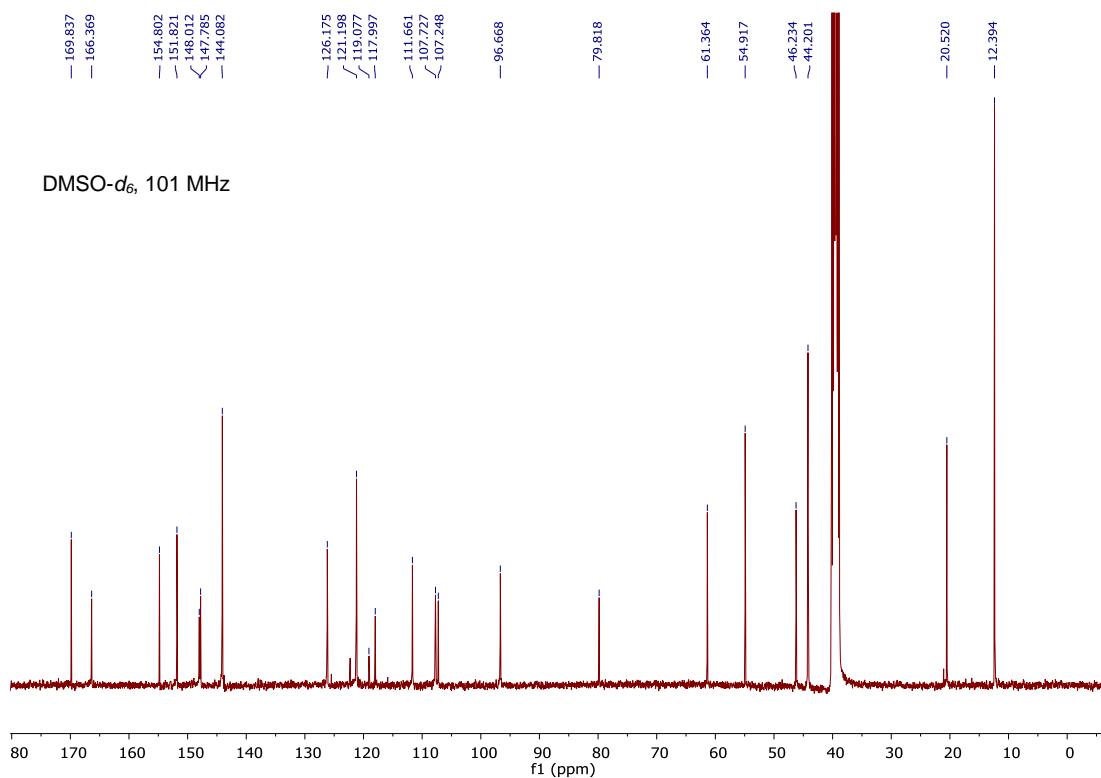

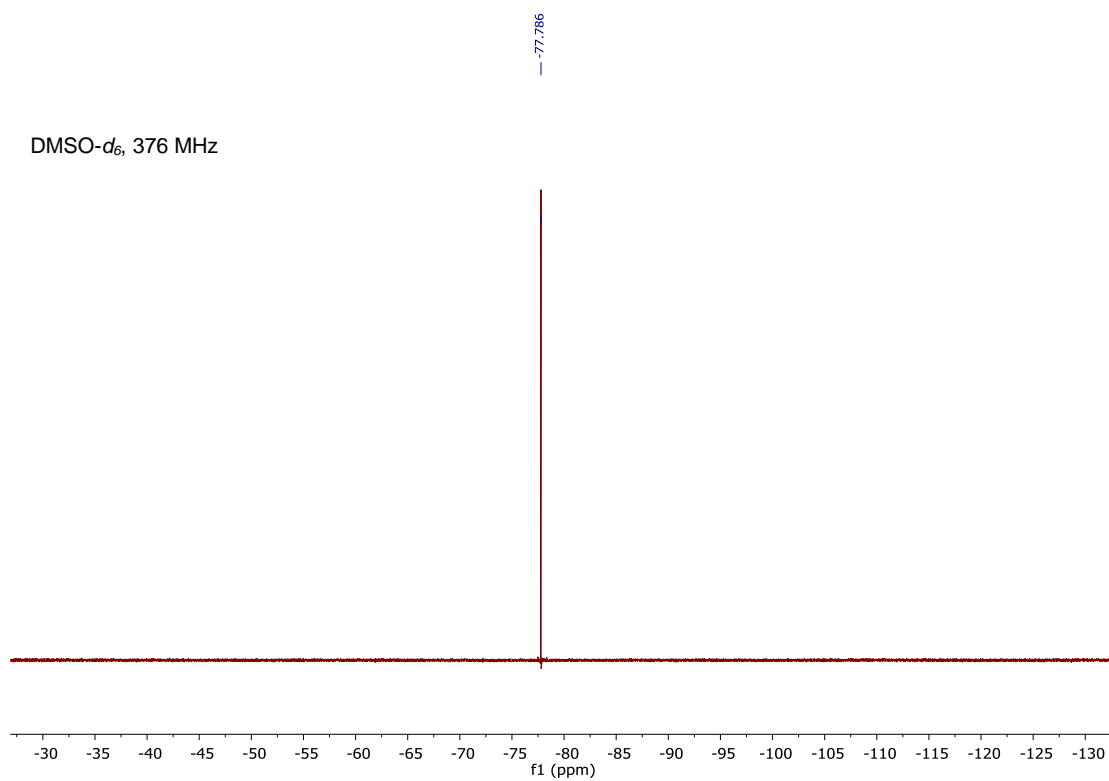

**Figure S54.**  $^1\text{H}$ ,  $^{13}\text{C}$  and  $^{19}\text{F}$  NMR spectra of compound **5** in DMSO-*d*<sub>6</sub>.

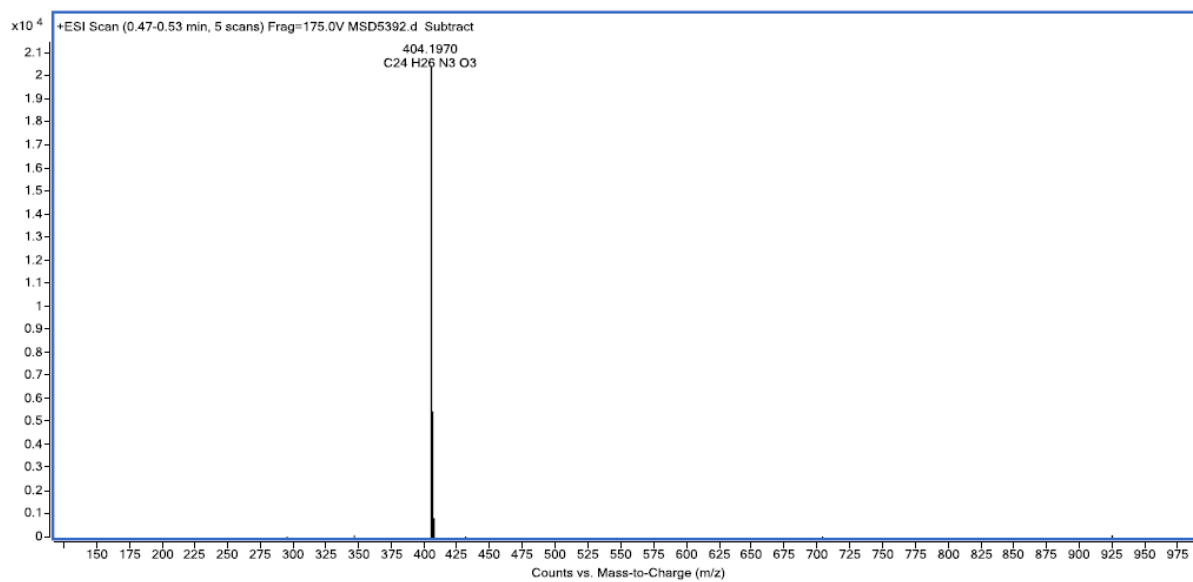

**Figure S55.** HR ESI-MS spectrum of compound **5**.

# Compound 6

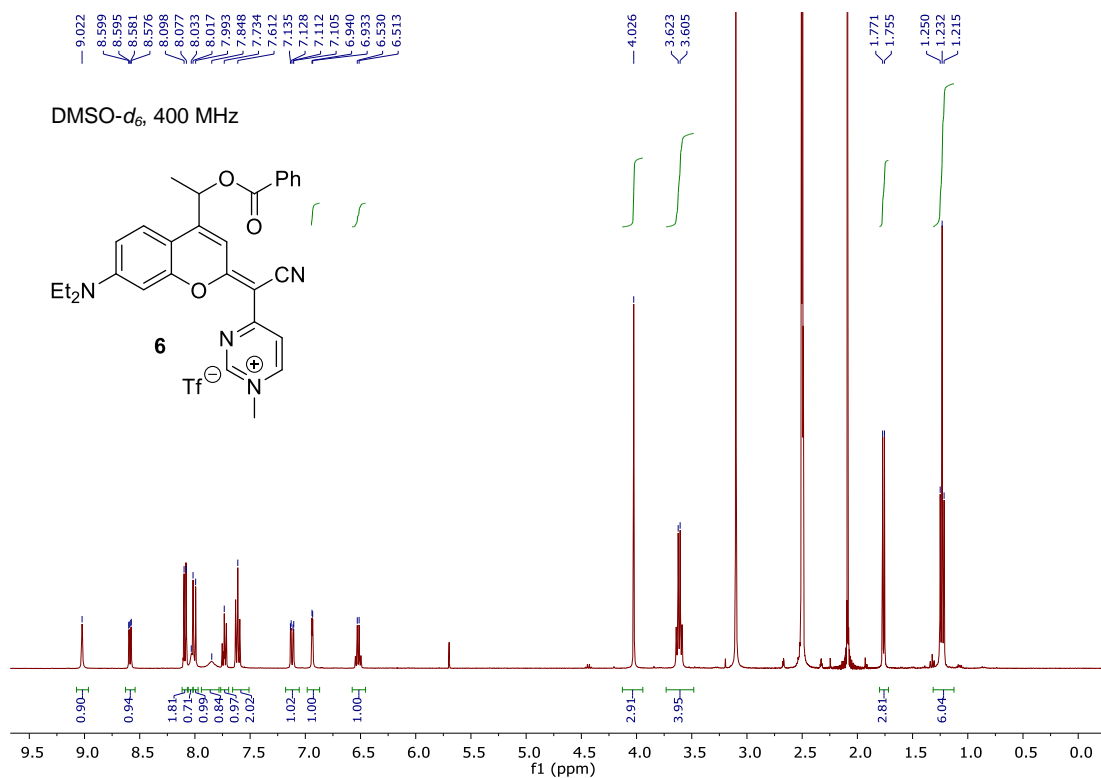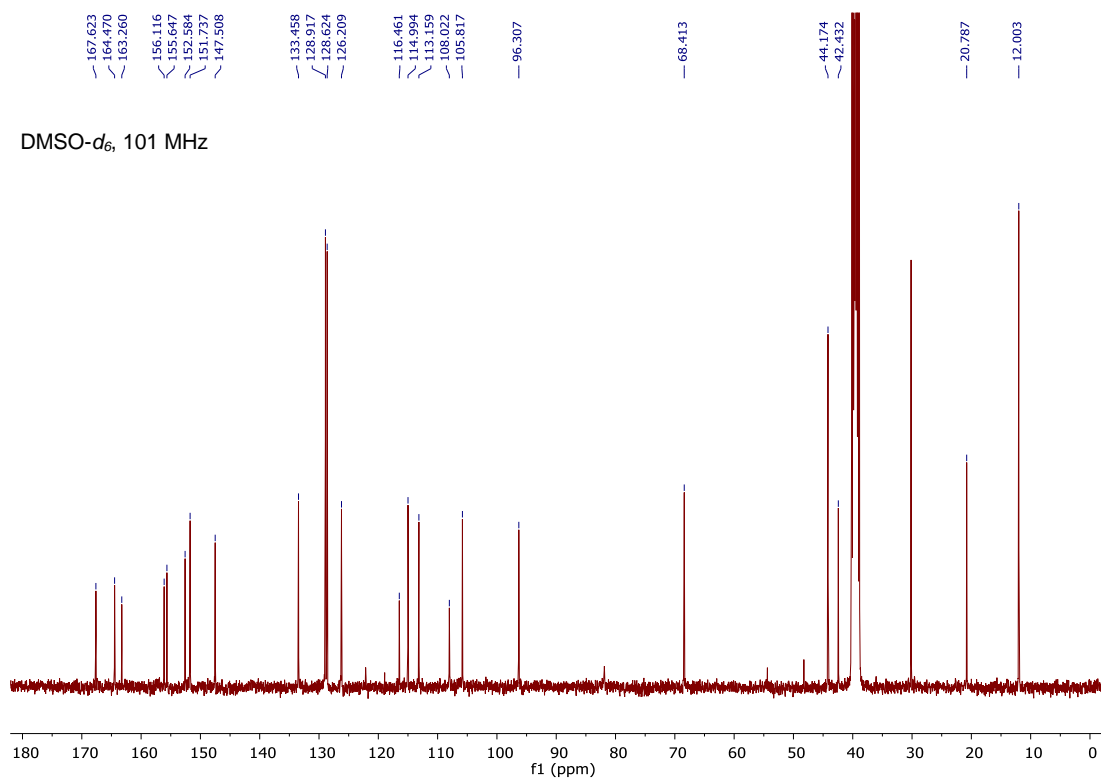

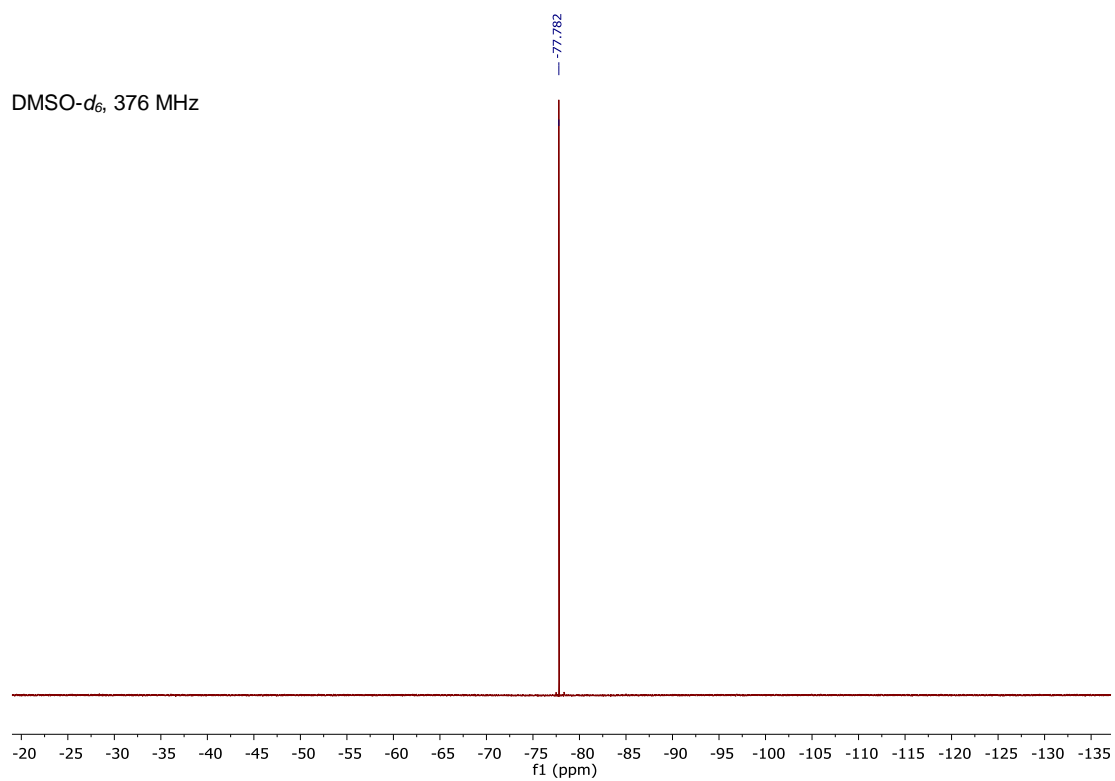

**Figure S56.**  $^1\text{H}$ ,  $^{13}\text{C}$  and  $^{19}\text{F}$  NMR spectra of compound **6** in DMSO-*d*<sub>6</sub>.  $^1\text{H}$  and  $^{13}\text{C}$  NMR spectra were recorded at 348 K.

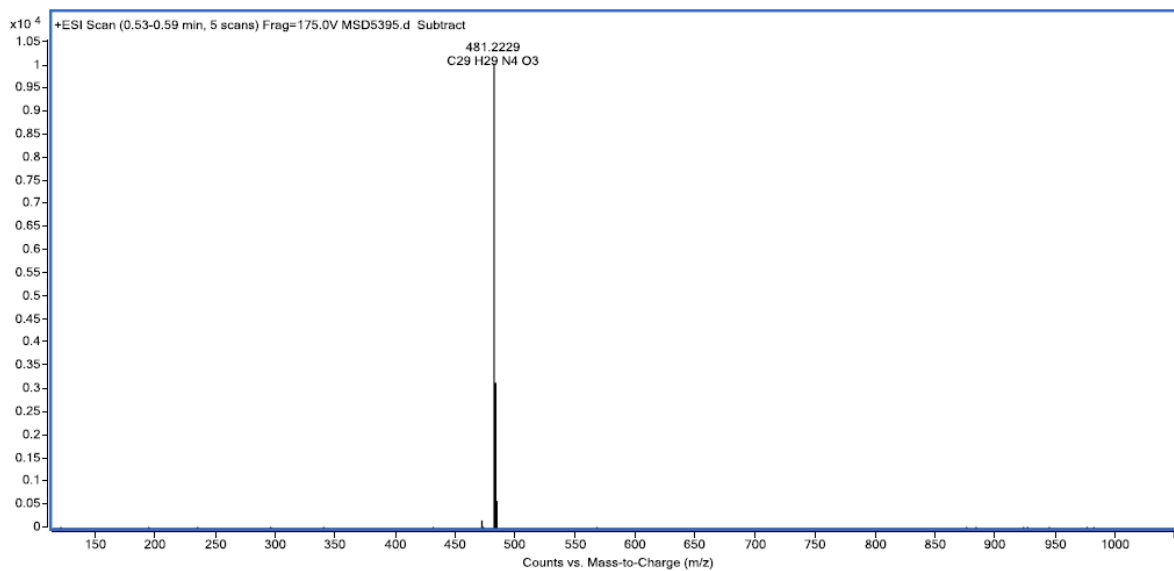

**Figure S57.** HR ESI-MS spectrum of compound **6**.

# Compound 7

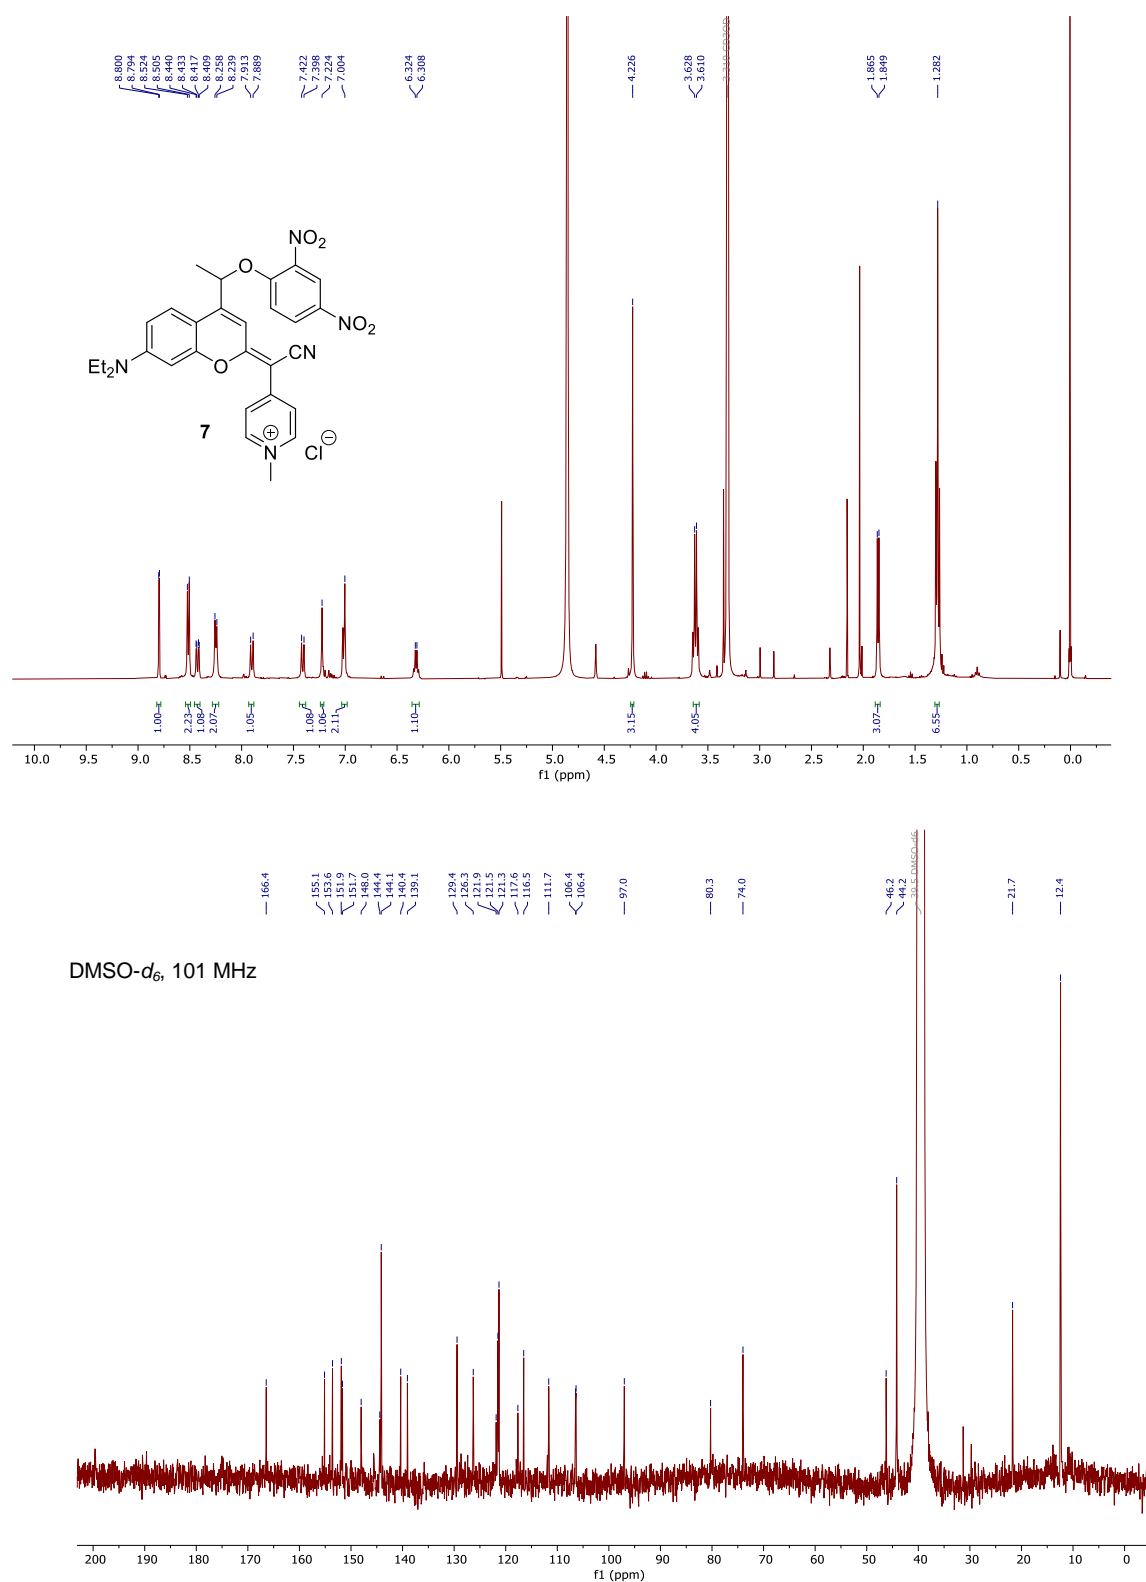

**Figure S58.** <sup>1</sup>H and <sup>13</sup>C NMR spectra of compound 7 in CD<sub>3</sub>OD and DMSO-*d*<sub>6</sub>, respectively.

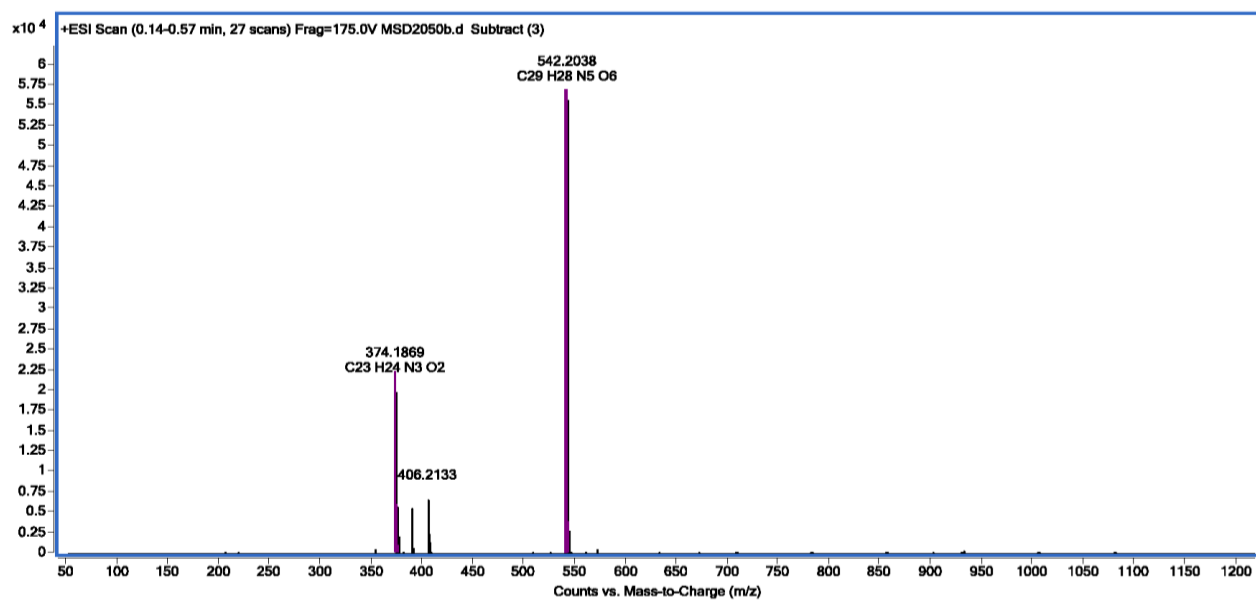

Figure S59. HR ESI-MS spectrum of compound 7.

# Compound 8

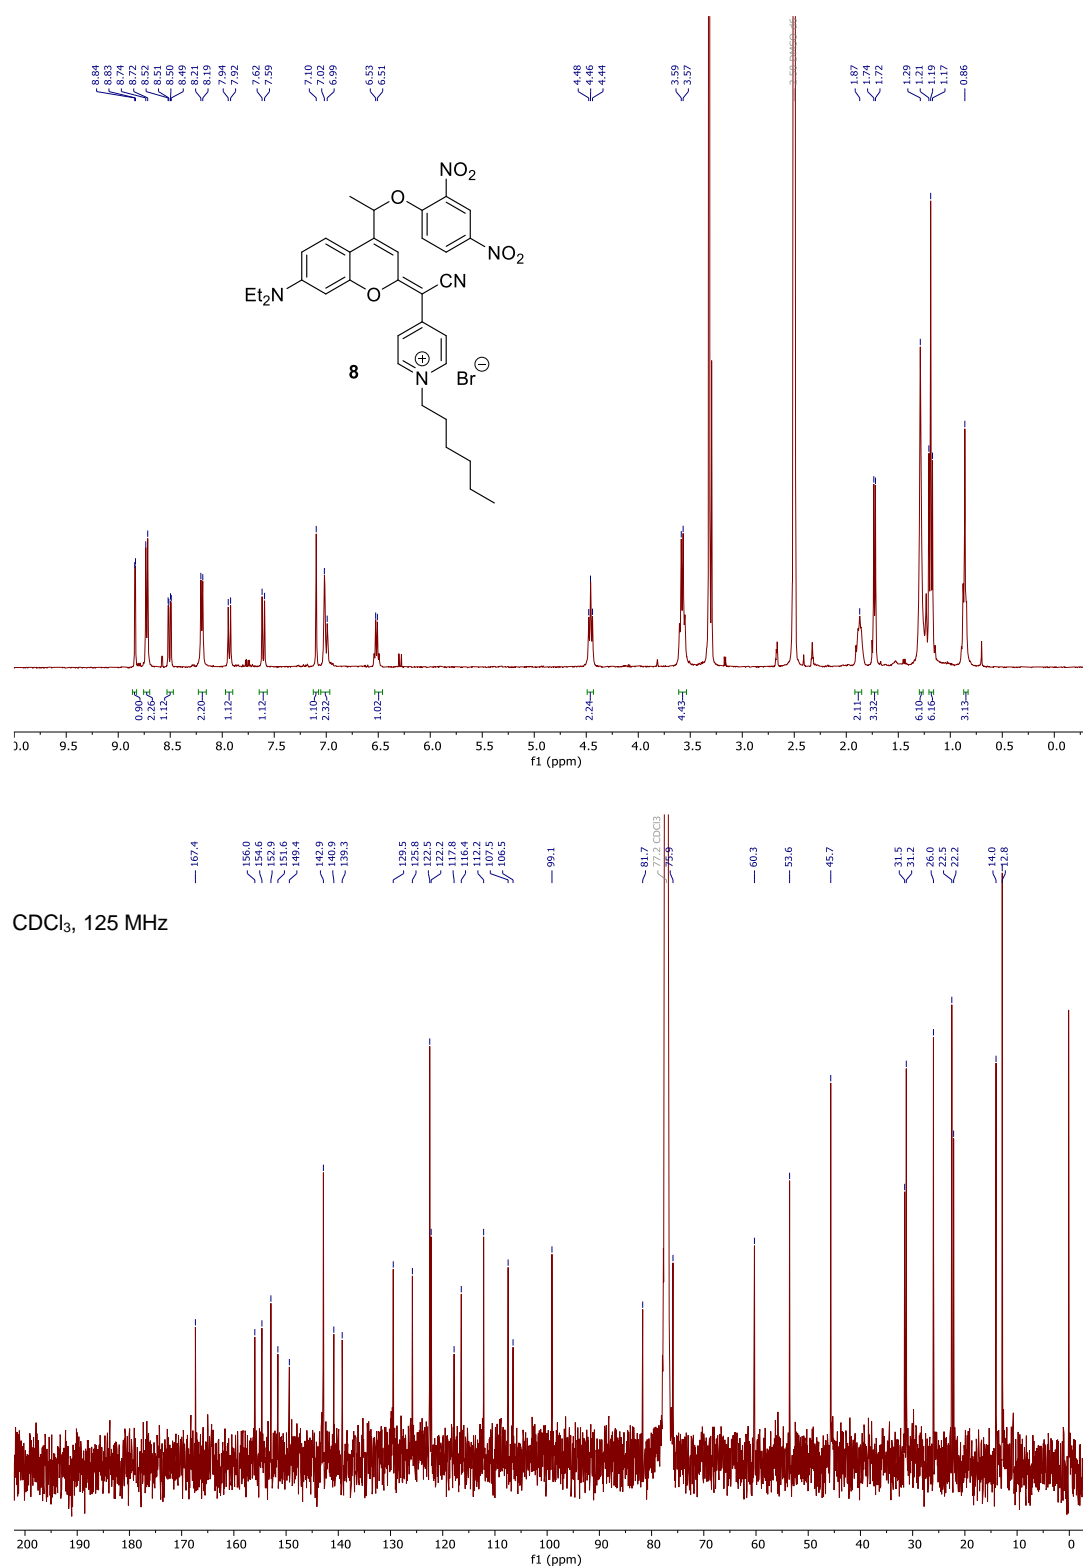

**Figure S60.** <sup>1</sup>H and <sup>13</sup>C NMR spectra of compound **8** in DMSO-*d*<sub>6</sub> and CDCl<sub>3</sub>, respectively.



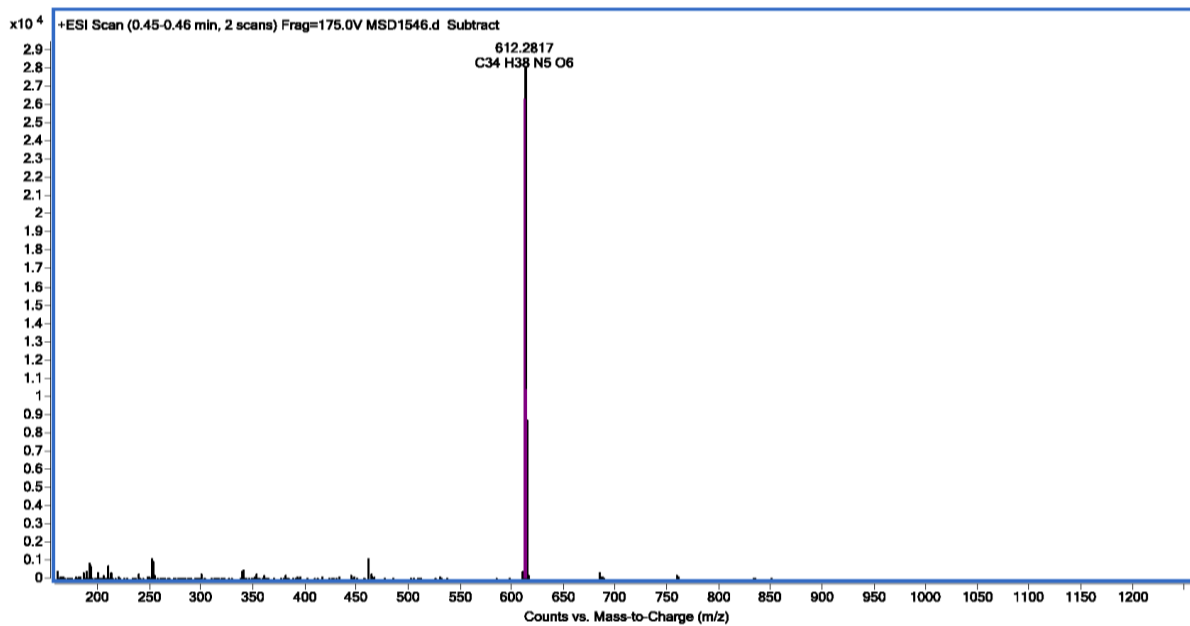

**Figure S61.** HR ESI-MS spectrum of compound **8**.
